# Supplementary material for: Comparative Microarray Analysis of Intestinal Lymphocytes following Eimeria acervulina, E. maxima, or E. tenella Infection in the Chicken
Source: PLoS One. 2011 Nov 28;6(11):e27712. doi: 10.1371/journal.pone.0027712 (PMC3225369; doi:10.1371/journal.pone.0027712)
Supplement: Table S1 — The annotated transcripts (P<0.0005) that were differentially expressed over the entire 6 day infection periods when comparing each infection group with uninfected controls. (XLS) [file pone.0027712.s001.xls]

## Sheet: Sheet1
Table S1. The annotated transcripts (P < 0.0005) that were differentially expressed over the entire 6 day infection periods when comparing each infection group with uninfected controls.
Infection Group	Symbol	Entrez Gene Name	p-value	Fold Change	Location	Type(s)
E. acervulina	TES	testis derived transcript (3 LIM domains)	5.61e-05	2.087	Plasma Membrane	other
Primary infection	GPD1	glycerol-3-phosphate dehydrogenase 1 (soluble)	0.000123	1.85	Cytoplasm	enzyme
	SLC16A10	solute carrier family 16, member 10 (aromatic amino acid transporter)	0.000461	1.588	Plasma Membrane	transporter
	SLC30A9	solute carrier family 30 (zinc transporter), member 9	0.00038	1.477	Nucleus	transporter
	TFG	TRK-fused gene	0.000254	1.477	Cytoplasm	other
	SDHD	succinate dehydrogenase complex, subunit D, integral membrane protein	0.000207	1.45	Cytoplasm	enzyme
	TARP	TCR gamma alternate reading frame protein	0.000217	1.435	Cytoplasm	other
	BSDC1	BSD domain containing 1	0.000182	1.407	unknown	other
	SLC9A3R1	solute carrier family 9 (sodium/hydrogen exchanger), member 3 regulator 1	0.000255	1.377	Plasma Membrane	other
	UBAC2	UBA domain containing 2	0.000155	1.364	unknown	other
	BST1	bone marrow stromal cell antigen 1	0.000292	1.353	Plasma Membrane	enzyme
	SEC14L1	SEC14-like 1 (S. cerevisiae)	0.000226	1.323	Cytoplasm	transporter
	ARPC1A	actin related protein 2/3 complex, subunit 1A, 41kDa	0.000263	1.292	Cytoplasm	other
	SLC4A7	solute carrier family 4, sodium bicarbonate cotransporter, member 7	0.000248	1.286	Plasma Membrane	transporter
	MYL12A	myosin, light chain 12A, regulatory, non-sarcomeric	2.53e-06	1.271	unknown	other
	WDR82	WD repeat domain 82	0.000278	1.23	unknown	other
	KIFAP3	kinesin-associated protein 3	0.000314	1.215	Cytoplasm	other
	STT3B	STT3, subunit of the oligosaccharyltransferase complex, homolog B (S. cerevisiae)	0.000376	1.214	Cytoplasm	enzyme
	C16orf62	chromosome 16 open reading frame 62	0.000462	1.173	unknown	other
	PYGL	phosphorylase, glycogen, liver	0.000183	1.166	unknown	enzyme
	PRDX6	peroxiredoxin 6	0.00022	-1.189	Cytoplasm	enzyme
	CNOT8	CCR4-NOT transcription complex, subunit 8	0.000391	-1.269	Nucleus	transcription regulator
	XRN2	5'-3' exoribonuclease 2	0.000122	-1.274	Nucleus	enzyme
	PUM1	pumilio homolog 1 (Drosophila)	2.01e-05	-1.277	Cytoplasm	other
	ENY2	enhancer of yellow 2 homolog (Drosophila)	0.000191	-1.296	Nucleus	other
	CABIN1	calcineurin binding protein 1	0.000288	-1.3	Nucleus	other
	NR1H3	nuclear receptor subfamily 1, group H, member 3	4.65e-05	-1.342	Nucleus	ligand-dependent nuclear receptor
	ADAM28	ADAM metallopeptidase domain 28	0.000207	-1.355	Plasma Membrane	peptidase
	GPN3	GPN-loop GTPase 3	0.000288	-1.423	unknown	other
	GALNT6	UDP-N-acetyl-alpha-D-galactosamine:polypeptide N-acetylgalactosaminyltransferase 6 (GalNAc-T6)	8.61e-05	-1.431	Cytoplasm	enzyme
	CLCN3	chloride channel 3	0.0005	-1.437	Plasma Membrane	ion channel
	ADHFE1	alcohol dehydrogenase, iron containing, 1	0.000382	-1.447	Cytoplasm	enzyme
	RRAGC	Ras-related GTP binding C	3.23e-05	-1.453	Cytoplasm	enzyme
	ACAD11	acyl-CoA dehydrogenase family, member 11	2.99e-05	-1.455	Cytoplasm	enzyme
	BRWD1	bromodomain and WD repeat domain containing 1	4.41e-05	-1.463	Nucleus	transcription regulator
	VANGL1	vang-like 1 (van gogh, Drosophila)	0.000122	-1.47	Cytoplasm	other
	CDHR2	cadherin-related family member 2	0.000272	-1.479	Plasma Membrane	other
	RAB9B	RAB9B, member RAS oncogene family	3.62e-05	-1.488	Plasma Membrane	enzyme
	LGALS3	lectin, galactoside-binding, soluble, 3	0.000264	-1.491	Extracellular Space	other
	PLBD1	phospholipase B domain containing 1	1.24e-06	-1.497	Extracellular Space	other
	FAM98A	family with sequence similarity 98, member A	2.53e-06	-1.499	unknown	other
	KIAA0586	KIAA0586	0.000248	-1.508	unknown	other
	ANXA11	annexin A11	0.00038	-1.516	Nucleus	other
	TNFRSF21	tumor necrosis factor receptor superfamily, member 21	5.37e-05	-1.524	Plasma Membrane	other
	CDC5L	CDC5 cell division cycle 5-like (S. pombe)	5.8e-06	-1.53	Nucleus	other
	RSPRY1	ring finger and SPRY domain containing 1	0.000213	-1.54	unknown	other
	PTBP1	polypyrimidine tract binding protein 1	0.000292	-1.542	Nucleus	enzyme
	ADAM9	ADAM metallopeptidase domain 9	0.000342	-1.548	Plasma Membrane	peptidase
	ITPK1	inositol-tetrakisphosphate 1-kinase	1.8e-05	-1.563	unknown	kinase
	ERGIC3	ERGIC and golgi 3	0.0005	-1.576	Cytoplasm	other
	CSNK1E	casein kinase 1, epsilon	8.56e-05	-1.589	Cytoplasm	kinase
	SRPR	signal recognition particle receptor (docking protein)	8.89e-05	-1.593	Cytoplasm	other
	PAPOLA	poly(A) polymerase alpha	4.25e-05	-1.601	Nucleus	enzyme
	TCERG1	transcription elongation regulator 1	5.8e-06	-1.634	Nucleus	transcription regulator
	RAB11B	RAB11B, member RAS oncogene family	2.29e-05	-1.635	Cytoplasm	enzyme
	RBBP6	--	2.03e-05	-1.636	Nucleus	other
	BAIAP2L1	BAI1-associated protein 2-like 1	0.0005	-1.643	Cytoplasm	other
	GNPNAT1	glucosamine-phosphate N-acetyltransferase 1	5.8e-06	-1.643	Cytoplasm	enzyme
	ABCB10	ATP-binding cassette, sub-family B (MDR/TAP), member 10	0.00014	-1.647	Cytoplasm	transporter
	WDR36	WD repeat domain 36	2.99e-05	-1.649	unknown	other
	TMEM171	transmembrane protein 171	3.28e-06	-1.65	unknown	other
	RNPEP	arginyl aminopeptidase (aminopeptidase B)	0.000488	-1.655	Cytoplasm	peptidase
	DNAJC3	DnaJ (Hsp40) homolog, subfamily C, member 3	0.000317	-1.659	Cytoplasm	other
	MPST	mercaptopyruvate sulfurtransferase	0.000114	-1.67	Cytoplasm	enzyme
	NRD1	nardilysin (N-arginine dibasic convertase)	0.0002	-1.675	Cytoplasm	peptidase
	CHMP1A	chromatin modifying protein 1A	0.000461	-1.691	Extracellular Space	peptidase
	C3orf52	chromosome 3 open reading frame 52	0.000383	-1.691	unknown	other
	TCP1	t-complex 1	0.000379	-1.724	Cytoplasm	other
	FAM133B	family with sequence similarity 133, member B	6.77e-05	-1.786	unknown	other
	C1orf69	IBA57, iron-sulfur cluster assembly homolog (S. cerevisiae)	1.23e-07	-1.797	Cytoplasm	other
	ELF1	E74-like factor 1 (ets domain transcription factor)	7.57e-05	-1.816	Nucleus	transcription regulator
	ACOX1	acyl-CoA oxidase 1, palmitoyl	0.000283	-1.833	Cytoplasm	enzyme
	NAPG	N-ethylmaleimide-sensitive factor attachment protein, gamma	0.000123	-1.858	Cytoplasm	transporter
	JUN	jun proto-oncogene	9.88e-05	-1.896	Nucleus	transcription regulator
	TXNDC11	thioredoxin domain containing 11	0.000462	-1.912	Cytoplasm	enzyme
	DDX6	DEAD (Asp-Glu-Ala-Asp) box polypeptide 6	0.000461	-1.946	Nucleus	enzyme
	TNRC6B	trinucleotide repeat containing 6B	0.0002	-1.959	unknown	other
	CBWD2	COBW domain containing 2	0.000314	-1.978	unknown	other
	PRPF40A	PRP40 pre-mRNA processing factor 40 homolog A (S. cerevisiae)	1.79e-06	-1.985	Nucleus	other
	FAM83H	family with sequence similarity 83, member H	0.000144	-2.017	unknown	other
	HIPK2	homeodomain interacting protein kinase 2	1.15e-05	-2.048	Nucleus	kinase
	KDM5B	lysine (K)-specific demethylase 5B	1.16e-05	-2.129	Nucleus	transcription regulator
	BTF3	basic transcription factor 3	0.000213	-2.134	Nucleus	transcription regulator
	ADD3	adducin 3 (gamma)	0.000267	-2.146	Cytoplasm	other
	UBE4B	ubiquitination factor E4B	5.76e-05	-2.196	Cytoplasm	enzyme
	FOXM1	forkhead box M1	0.000172	-2.22	Nucleus	transcription regulator
	SDF2L1	stromal cell-derived factor 2-like 1	0.000239	-2.261	Cytoplasm	other
	EEF2	eukaryotic translation elongation factor 2	0.000232	-2.341	Cytoplasm	translation regulator
	SURF4	surfeit 4	2.53e-06	-2.421	Cytoplasm	other
	DCTD	dCMP deaminase	3.51e-06	-2.463	unknown	enzyme
	FDXR	ferredoxin reductase	2.03e-05	-2.609	Cytoplasm	enzyme
	HNRNPH1	heterogeneous nuclear ribonucleoprotein H1 (H)	1.89e-08	-2.828	Nucleus	other
	SMARCA1	SWI/SNF related, matrix associated, actin dependent regulator of chromatin, subfamily a, member 1	2.53e-06	-2.948	Nucleus	transcription regulator
	STK4	serine/threonine kinase 4	2.53e-06	-3.087	Cytoplasm	kinase
	SEC16B	SEC16 homolog B (S. cerevisiae)	6.48e-05	-3.112	Nucleus	other
	SLC41A2	solute carrier family 41, member 2	2.53e-06	-3.692	unknown	transporter
	LUC7L3	LUC7-like 3 (S. cerevisiae)	8.23e-08	-4.141	Nucleus	other
	DIAPH1	diaphanous homolog 1 (Drosophila)	4.01e-05	-4.237	Cytoplasm	other
	FRAS1	Fraser syndrome 1	3.28e-06	-4.291	Extracellular Space	other
	MYST2	MYST histone acetyltransferase 2	1.89e-08	-4.578	Nucleus	enzyme
	ABCB1	ATP-binding cassette, sub-family B (MDR/TAP), member 1	2.52e-06	-6.444	Plasma Membrane	transporter
	SLC43A2	solute carrier family 43, member 2	1.79e-06	-6.968	Plasma Membrane	transporter
	ENPP7	ectonucleotide pyrophosphatase/phosphodiesterase 7	6.2e-06	-22.494	Cytoplasm	enzyme
	FABP6	fatty acid binding protein 6, ileal	4.23e-07	-26.966	Cytoplasm	transporter
E. acervulina	SLC31A2	solute carrier family 31 (copper transporters), member 2	1.11e-05	2.805	Plasma Membrane	transporter
Secondary infection	ATAD1	ATPase family, AAA domain containing 1	4.23e-07	2.665	Cytoplasm	other
	SLC25A12	solute carrier family 25 (mitochondrial carrier, Aralar), member 12	3.94e-07	2.656	Cytoplasm	transporter
	YARS2	tyrosyl-tRNA synthetase 2, mitochondrial	8.25e-08	2.62	Cytoplasm	enzyme
	IYD	iodotyrosine deiodinase	1.73e-07	2.568	Plasma Membrane	enzyme
	GIMAP5	GTPase, IMAP family member 5	1.58e-07	2.547	Cytoplasm	other
	MSMB	microseminoprotein, beta-	3.31e-05	2.522	Extracellular Space	other
	PTGR1	prostaglandin reductase 1	3.49e-07	2.493	Cytoplasm	enzyme
	CALB1	calbindin 1, 28kDa	1.71e-05	2.442	Cytoplasm	other
	WDFY3	WD repeat and FYVE domain containing 3	1.65e-06	2.38	Cytoplasm	enzyme
	LLGL2	lethal giant larvae homolog 2 (Drosophila)	7.19e-05	2.378	Cytoplasm	other
	CELSR3	cadherin, EGF LAG seven-pass G-type receptor 3 (flamingo homolog, Drosophila)	1.63e-06	2.31	Plasma Membrane	G-protein coupled receptor
	FZD4	frizzled family receptor 4	2.54e-08	2.28	Plasma Membrane	G-protein coupled receptor
	LRRC59	leucine rich repeat containing 59	2.38e-06	2.278	Cytoplasm	other
	LETM1	leucine zipper-EF-hand containing transmembrane protein 1	0.000127	2.274	Cytoplasm	other
	LRRFIP2	--	3.03e-08	2.268	unknown	other
	PDIA5	protein disulfide isomerase family A, member 5	4.78e-05	2.262	Cytoplasm	enzyme
	DCAF12	DDB1 and CUL4 associated factor 12	9.76e-06	2.258	unknown	other
	ABI3	ABI family, member 3	4.06e-08	2.255	Plasma Membrane	other
	FES	feline sarcoma oncogene	2.46e-08	2.243	Cytoplasm	kinase
	SDSL	serine dehydratase-like	5.63e-07	2.242	Cytoplasm	enzyme
	IL21R	interleukin 21 receptor	9.47e-07	2.234	Plasma Membrane	transmembrane receptor
	ME1	malic enzyme 1, NADP(+)-dependent, cytosolic	2.21e-09	2.233	Cytoplasm	enzyme
	RNF34	ring finger protein 34	4.44e-07	2.227	Cytoplasm	enzyme
	M6PR	mannose-6-phosphate receptor (cation dependent)	2.45e-07	2.217	Cytoplasm	transporter
	PET112L	PET112 homolog (yeast)	2.39e-07	2.216	Cytoplasm	translation regulator
	ADA	adenosine deaminase	2.3e-07	2.207	Cytoplasm	enzyme
	CYP2J2	cytochrome P450, family 2, subfamily J, polypeptide 2	0.00016	2.205	Cytoplasm	enzyme
	ERLIN2	ER lipid raft associated 2	7.81e-06	2.202	Plasma Membrane	other
	ROD1	ROD1 regulator of differentiation 1 (S. pombe)	0.000108	2.176	Nucleus	other
	CLDN10	claudin 10	2.08e-05	2.173	Plasma Membrane	other
	RNASEH1	ribonuclease H1	2.96e-06	2.162	Nucleus	enzyme
	GABPB1	GA binding protein transcription factor, beta subunit 1	5.38e-07	2.133	Nucleus	transcription regulator
	ATP6V0E2	ATPase, H+ transporting V0 subunit e2	5.96e-08	2.132	unknown	enzyme
	FAAH	fatty acid amide hydrolase	6.76e-06	2.115	Plasma Membrane	enzyme
	EPB41L3	erythrocyte membrane protein band 4.1-like 3	2.22e-05	2.114	Plasma Membrane	other
	NCOA4	nuclear receptor coactivator 4	0.000214	2.111	Nucleus	transcription regulator
	FLOT2	flotillin 2	8.32e-05	2.107	Plasma Membrane	other
	IL16	interleukin 16 (lymphocyte chemoattractant factor)	7.44e-07	2.104	Extracellular Space	cytokine
	STARD5	StAR-related lipid transfer (START) domain containing 5	8.12e-05	2.103	Cytoplasm	transporter
	PHF11	PHD finger protein 11	1.54e-06	2.075	unknown	other
	C7orf23	chromosome 7 open reading frame 23	1.26e-06	2.07	unknown	other
	CDK5RAP2	CDK5 regulatory subunit associated protein 2	1.21e-06	2.063	Cytoplasm	other
	AHCY	adenosylhomocysteinase	2.69e-07	2.06	Cytoplasm	enzyme
	EIF4E	eukaryotic translation initiation factor 4E	0.000134	2.009	Cytoplasm	translation regulator
	BCAR3	breast cancer anti-estrogen resistance 3	5.16e-06	2.005	Cytoplasm	other
	ZNF319	zinc finger protein 319	4.46e-05	1.976	Nucleus	other
	GLIPR1	GLI pathogenesis-related 1	1.22e-07	1.974	Extracellular Space	other
	GPX4	glutathione peroxidase 4 (phospholipid hydroperoxidase)	6.71e-08	1.963	Cytoplasm	enzyme
	SASS6	spindle assembly 6 homolog (C. elegans)	1.26e-06	1.95	Cytoplasm	other
	SVIL	supervillin	0.000113	1.946	Plasma Membrane	other
	PI4K2B	phosphatidylinositol 4-kinase type 2 beta	5.07e-07	1.926	Cytoplasm	kinase
	PLEKHJ1	pleckstrin homology domain containing, family J member 1	8.47e-06	1.923	unknown	other
	DNAJC16	DnaJ (Hsp40) homolog, subfamily C, member 16	7.25e-06	1.921	unknown	other
	NTS	neurotensin	7.62e-08	1.921	Extracellular Space	other
	EIF3I	eukaryotic translation initiation factor 3, subunit I	2.81e-06	1.919	Cytoplasm	translation regulator
	GRAMD3	GRAM domain containing 3	1.47e-09	1.91	unknown	other
	TSPAN5	tetraspanin 5	8.29e-07	1.91	Plasma Membrane	other
	ULK1	unc-51-like kinase 1 (C. elegans)	6.92e-07	1.909	Cytoplasm	kinase
	C6orf192	chromosome 6 open reading frame 192	7.77e-07	1.901	unknown	other
	CYP2C9	cytochrome P450, family 2, subfamily C, polypeptide 9	3.66e-05	1.898	Cytoplasm	enzyme
	EPHX1	epoxide hydrolase 1, microsomal (xenobiotic)	6.82e-06	1.897	Cytoplasm	peptidase
	MAPK1IP1L	mitogen-activated protein kinase 1 interacting protein 1-like	1.09e-06	1.876	Nucleus	other
	PITRM1	pitrilysin metallopeptidase 1	3.34e-08	1.875	Cytoplasm	peptidase
	SLCO2A1	solute carrier organic anion transporter family, member 2A1	6.09e-06	1.867	Plasma Membrane	transporter
	EIF5	eukaryotic translation initiation factor 5	5.45e-06	1.849	Cytoplasm	translation regulator
	CSNK2A2	casein kinase 2, alpha prime polypeptide	6.76e-05	1.846	Cytoplasm	kinase
	FLCN	folliculin	2.84e-06	1.836	unknown	other
	RAB22A	RAB22A, member RAS oncogene family	1.73e-07	1.836	Cytoplasm	enzyme
	DMTF1	cyclin D binding myb-like transcription factor 1	6.98e-06	1.835	Nucleus	transcription regulator
	DYRK2	dual-specificity tyrosine-(Y)-phosphorylation regulated kinase 2	4.37e-05	1.833	Cytoplasm	kinase
	SSX2IP	synovial sarcoma, X breakpoint 2 interacting protein	2.54e-07	1.832	Plasma Membrane	other
	GSTT1	glutathione S-transferase theta 1	3.31e-05	1.83	Cytoplasm	enzyme
	FBP1	fructose-1,6-bisphosphatase 1	9.25e-08	1.812	Cytoplasm	phosphatase
	FAM162B	family with sequence similarity 162, member B	2.27e-06	1.808	unknown	other
	SLMAP	sarcolemma associated protein	3.4e-07	1.802	Plasma Membrane	other
	ACO1	aconitase 1, soluble	2.98e-07	1.787	Cytoplasm	enzyme
	PEPD	peptidase D	3.69e-07	1.783	Cytoplasm	peptidase
	D2HGDH	D-2-hydroxyglutarate dehydrogenase	5.51e-07	1.781	Cytoplasm	other
	INSIG1	insulin induced gene 1	0.000401	1.78	Cytoplasm	other
	BBOX1	butyrobetaine (gamma), 2-oxoglutarate dioxygenase (gamma-butyrobetaine hydroxylase) 1	2.15e-05	1.779	Cytoplasm	enzyme
	GPAM	glycerol-3-phosphate acyltransferase, mitochondrial	1.97e-06	1.769	Cytoplasm	enzyme
	MAP3K14	mitogen-activated protein kinase kinase kinase 14	5.43e-06	1.76	Cytoplasm	kinase
	ZMYM3	zinc finger, MYM-type 3	2.7e-05	1.754	Nucleus	other
	IQSEC1	IQ motif and Sec7 domain 1	5.57e-07	1.748	Cytoplasm	other
	ARCN1	archain 1	2.44e-06	1.744	Cytoplasm	other
	CIDEA	cell death-inducing DFFA-like effector a	2.84e-06	1.742	Cytoplasm	other
	ZCCHC6	zinc finger, CCHC domain containing 6	2.9e-05	1.741	unknown	other
	C17orf103	chromosome 17 open reading frame 103	2e-05	1.737	unknown	other
	GLCCI1	glucocorticoid induced transcript 1	2.8e-06	1.734	unknown	other
	ZDHHC21	zinc finger, DHHC-type containing 21	1.88e-05	1.731	Plasma Membrane	other
	MMD	monocyte to macrophage differentiation-associated	9.54e-05	1.729	Plasma Membrane	other
	MCC	mutated in colorectal cancers	2.39e-07	1.723	Cytoplasm	other
	C20orf108	chromosome 20 open reading frame 108	0.000457	1.721	Extracellular Space	other
	OTUD3	OTU domain containing 3	7.12e-06	1.716	unknown	other
	GRPEL1	GrpE-like 1, mitochondrial (E. coli)	1.4e-06	1.715	Cytoplasm	other
	EIF2AK4	eukaryotic translation initiation factor 2 alpha kinase 4	1.24e-07	1.714	Cytoplasm	kinase
	FANCG	Fanconi anemia, complementation group G	3.54e-07	1.71	Nucleus	other
	CDV3	CDV3 homolog (mouse)	1.39e-06	1.709	unknown	other
	HKDC1	hexokinase domain containing 1	3.41e-07	1.709	Nucleus	kinase
	GPATCH2	--	2.73e-05	1.704	unknown	other
	CLIC5	chloride intracellular channel 5	1.81e-07	1.699	Cytoplasm	ion channel
	EFTUD2	elongation factor Tu GTP binding domain containing 2	5.02e-06	1.698	Nucleus	enzyme
	PAPSS1	3'-phosphoadenosine 5'-phosphosulfate synthase 1	0.000338	1.696	Cytoplasm	enzyme
	DAO	D-amino-acid oxidase	6.98e-06	1.693	Cytoplasm	enzyme
	DEF6	differentially expressed in FDCP 6 homolog (mouse)	2.59e-07	1.693	Extracellular Space	other
	PJA2	praja ring finger 2	9.37e-05	1.693	Cytoplasm	other
	DHDDS	dehydrodolichyl diphosphate synthase	7.47e-08	1.687	unknown	enzyme
	CTSZ	cathepsin Z	7.97e-08	1.686	Cytoplasm	peptidase
	PTPN22	protein tyrosine phosphatase, non-receptor type 22 (lymphoid)	1.52e-07	1.682	Cytoplasm	phosphatase
	LRPPRC	leucine-rich PPR-motif containing	5.21e-05	1.676	Cytoplasm	other
	APOA1	apolipoprotein A-I	4.54e-06	1.672	Extracellular Space	transporter
	PML	promyelocytic leukemia	6.83e-05	1.672	Nucleus	transcription regulator
	KIAA0368	KIAA0368	4.11e-06	1.669	Cytoplasm	other
	SDHD	succinate dehydrogenase complex, subunit D, integral membrane protein	7.62e-08	1.669	Cytoplasm	enzyme
	IQGAP1	IQ motif containing GTPase activating protein 1	8.55e-07	1.668	Cytoplasm	other
	ADIPOR1	adiponectin receptor 1	2.43e-06	1.663	Plasma Membrane	transmembrane receptor
	BHLHE40	basic helix-loop-helix family, member e40	2.05e-05	1.66	Nucleus	transcription regulator
	PGRMC1	progesterone receptor membrane component 1	8.55e-07	1.659	Plasma Membrane	other
	PDCD1	programmed cell death 1	7.19e-05	1.659	Plasma Membrane	other
	MED24	mediator complex subunit 24	6.3e-06	1.657	Nucleus	transcription regulator
	CHERP	calcium homeostasis endoplasmic reticulum protein	1.9e-05	1.653	Cytoplasm	other
	PPP2CB	protein phosphatase 2, catalytic subunit, beta isozyme	2.07e-05	1.653	Cytoplasm	phosphatase
	TCIRG1	T-cell, immune regulator 1, ATPase, H+ transporting, lysosomal V0 subunit A3	1.32e-05	1.652	Plasma Membrane	enzyme
	WDR43	WD repeat domain 43	1.98e-05	1.651	Nucleus	other
	DGAT2	diacylglycerol O-acyltransferase 2	1.49e-05	1.649	Cytoplasm	enzyme
	GK	glycerol kinase	6.83e-05	1.648	Cytoplasm	kinase
	CCBL1	cysteine conjugate-beta lyase, cytoplasmic	0.000112	1.642	Cytoplasm	enzyme
	UGT1A1	UDP glucuronosyltransferase 1 family, polypeptide A1	6.62e-05	1.633	Cytoplasm	enzyme
	TSTD2	thiosulfate sulfurtransferase (rhodanese)-like domain containing 2	3.12e-06	1.632	unknown	other
	STK17B	serine/threonine kinase 17b	0.000121	1.631	Nucleus	kinase
	RB1	retinoblastoma 1	0.000119	1.629	Nucleus	transcription regulator
	ZNF512B	zinc finger protein 512B	7.42e-06	1.629	Nucleus	other
	ARPC1B	actin related protein 2/3 complex, subunit 1B, 41kDa	2.7e-07	1.627	Cytoplasm	other
	ANXA7	annexin A7	7.77e-07	1.621	Plasma Membrane	ion channel
	GLUL	glutamate-ammonia ligase	0.000123	1.618	Cytoplasm	enzyme
	BDH1	3-hydroxybutyrate dehydrogenase, type 1	8.54e-07	1.616	Cytoplasm	enzyme
	RIC8B	resistance to inhibitors of cholinesterase 8 homolog B (C. elegans)	7.28e-06	1.616	unknown	other
	POLR1E	polymerase (RNA) I polypeptide E, 53kDa	2.39e-07	1.61	Nucleus	enzyme
	PFKFB2	6-phosphofructo-2-kinase/fructose-2,6-biphosphatase 2	4.71e-06	1.609	Cytoplasm	kinase
	FASN	fatty acid synthase	3.73e-05	1.604	Cytoplasm	enzyme
	CTSH	cathepsin H	1.49e-07	1.602	Cytoplasm	peptidase
	BSDC1	BSD domain containing 1	5.15e-07	1.599	unknown	other
	GZMK	granzyme K (granzyme 3; tryptase II)	0.000494	1.598	Cytoplasm	peptidase
	TYRO3	TYRO3 protein tyrosine kinase	2.58e-07	1.598	Plasma Membrane	kinase
	ACOT13	acyl-CoA thioesterase 13	7.74e-06	1.597	Cytoplasm	enzyme
	CYP1A1	cytochrome P450, family 1, subfamily A, polypeptide 1	8.89e-05	1.597	Cytoplasm	enzyme
	ZNF706	zinc finger protein 706	2.53e-07	1.597	unknown	other
	ITGB5	integrin, beta 5	0.000246	1.595	Plasma Membrane	other
	HSD17B4	hydroxysteroid (17-beta) dehydrogenase 4	2.54e-07	1.593	Cytoplasm	enzyme
	ADH1B	alcohol dehydrogenase 1B (class I), beta polypeptide	1.75e-06	1.587	Cytoplasm	enzyme
	WWOX	WW domain containing oxidoreductase	1.69e-07	1.586	Cytoplasm	enzyme
	RPL10A	--	1.69e-07	1.585	Cytoplasm	other
	MAK16	MAK16 homolog (S. cerevisiae)	3.46e-06	1.584	Nucleus	other
	SLC35E2B	solute carrier family 35, member E2B	2.04e-06	1.58	unknown	other
	PCSK5	proprotein convertase subtilisin/kexin type 5	9.51e-06	1.579	Extracellular Space	peptidase
	SLC3A1	solute carrier family 3 (cystine, dibasic and neutral amino acid transporters, activator of cystine, dibasic and neutral amino acid transport), member 1	7.44e-05	1.575	Plasma Membrane	transporter
	NAA15	N(alpha)-acetyltransferase 15, NatA auxiliary subunit	0.000234	1.571	Nucleus	transcription regulator
	SDR16C5	short chain dehydrogenase/reductase family 16C, member 5	0.000192	1.57	Cytoplasm	enzyme
	CCDC21	centrosomal protein 85kDa	6.57e-06	1.569	unknown	other
	SLC28A2	solute carrier family 28 (sodium-coupled nucleoside transporter), member 2	1.83e-05	1.569	Plasma Membrane	transporter
	CDKN2B	cyclin-dependent kinase inhibitor 2B (p15, inhibits CDK4)	3.35e-07	1.568	Nucleus	transcription regulator
	RAB10	RAB10, member RAS oncogene family	0.000407	1.568	Cytoplasm	enzyme
	DHX35	DEAH (Asp-Glu-Ala-His) box polypeptide 35	5.72e-06	1.566	unknown	enzyme
	VAV3	vav 3 guanine nucleotide exchange factor	7.18e-05	1.566	Extracellular Space	cytokine
	SEPX1	selenoprotein X, 1	1.14e-06	1.562	unknown	enzyme
	STK10	serine/threonine kinase 10	2.22e-06	1.562	Cytoplasm	kinase
	ACAA2	acetyl-CoA acyltransferase 2	1.11e-08	1.561	Cytoplasm	enzyme
	AQP11	aquaporin 11	6.71e-06	1.56	unknown	transporter
	MAPKAPK3	mitogen-activated protein kinase-activated protein kinase 3	5.63e-07	1.559	Nucleus	kinase
	RHOT2	ras homolog gene family, member T2	1.46e-05	1.555	Cytoplasm	enzyme
	BPNT1	3'(2'), 5'-bisphosphate nucleotidase 1	7.09e-06	1.553	Nucleus	phosphatase
	CA7	carbonic anhydrase VII	1.15e-05	1.553	Cytoplasm	enzyme
	SYAP1	synapse associated protein 1	7.21e-06	1.553	Nucleus	other
	ANGEL2	angel homolog 2 (Drosophila)	2.06e-05	1.55	Nucleus	other
	TM4SF4	transmembrane 4 L six family member 4	0.000258	1.55	Plasma Membrane	other
	SEC24C	SEC24 family, member C (S. cerevisiae)	3.05e-06	1.547	Cytoplasm	transporter
	ELK3	ELK3, ETS-domain protein (SRF accessory protein 2)	0.000179	1.546	Nucleus	transcription regulator
	HSD11B1	hydroxysteroid (11-beta) dehydrogenase 1	6.93e-06	1.544	Cytoplasm	enzyme
	TMEM189-UBE2V1	TMEM189-UBE2V1 readthrough	1.89e-06	1.543	Cytoplasm	other
	IP6K2	inositol hexakisphosphate kinase 2	0.000171	1.542	Cytoplasm	kinase
	RBM39	RNA binding motif protein 39	1.91e-06	1.542	Nucleus	transcription regulator
	DOCK7	dedicator of cytokinesis 7	8.34e-06	1.541	unknown	other
	DUS4L	dihydrouridine synthase 4-like (S. cerevisiae)	0.000268	1.541	unknown	other
	LPIN2	lipin 2	1.35e-06	1.54	Nucleus	phosphatase
	TCEANC	transcription elongation factor A (SII) N-terminal and central domain containing	3.62e-05	1.54	unknown	other
	POR	P450 (cytochrome) oxidoreductase	0.000372	1.539	Cytoplasm	enzyme
	CYB5A	cytochrome b5 type A (microsomal)	0.000156	1.538	Cytoplasm	enzyme
	MDH2	malate dehydrogenase 2, NAD (mitochondrial)	2.48e-07	1.538	Cytoplasm	enzyme
	ALDH3A2	aldehyde dehydrogenase 3 family, member A2	1.83e-07	1.536	Cytoplasm	enzyme
	BROX	--	1.53e-05	1.534	unknown	other
	FABP2	fatty acid binding protein 2, intestinal	2.04e-05	1.528	Cytoplasm	transporter
	C1orf124	chromosome 1 open reading frame 124	6.42e-05	1.527	Nucleus	other
	SDAD1	SDA1 domain containing 1	0.000196	1.526	Nucleus	other
	BTBD9	BTB (POZ) domain containing 9	4.23e-06	1.523	unknown	other
	JMJD6	jumonji domain containing 6	5.03e-05	1.521	Plasma Membrane	other
	MUT	methylmalonyl CoA mutase	9.16e-05	1.521	Cytoplasm	enzyme
	VPS54	vacuolar protein sorting 54 homolog (S. cerevisiae)	7.26e-06	1.52	unknown	other
	GATA5	GATA binding protein 5	2.03e-05	1.519	Nucleus	transcription regulator
	MKKS	McKusick-Kaufman syndrome	5.1e-06	1.519	Cytoplasm	other
	PTP4A3	protein tyrosine phosphatase type IVA, member 3	5.77e-05	1.519	Plasma Membrane	phosphatase
	COX11	COX11 cytochrome c oxidase assembly homolog (yeast)	9.43e-05	1.518	Cytoplasm	enzyme
	CMTM7	CKLF-like MARVEL transmembrane domain containing 7	7.03e-06	1.517	Extracellular Space	cytokine
	RALB	v-ral simian leukemia viral oncogene homolog B (ras related; GTP binding protein)	0.000367	1.517	Cytoplasm	enzyme
	SNX4	sorting nexin 4	2.7e-05	1.514	Cytoplasm	transporter
	TFG	TRK-fused gene	7.59e-06	1.507	Cytoplasm	other
	ARFGAP3	ADP-ribosylation factor GTPase activating protein 3	5.73e-05	1.506	Cytoplasm	transporter
	SRSF3	serine/arginine-rich splicing factor 3	0.0001	1.506	Nucleus	other
	SLC27A4	solute carrier family 27 (fatty acid transporter), member 4	0.000449	1.504	Plasma Membrane	transporter
	USP32	ubiquitin specific peptidase 32	2.39e-07	1.503	Cytoplasm	enzyme
	LYSMD2	LysM, putative peptidoglycan-binding, domain containing 2	1.66e-07	1.502	unknown	other
	SORD	sorbitol dehydrogenase	0.000205	1.502	Cytoplasm	enzyme
	TMEM231	transmembrane protein 231	0.000117	1.502	unknown	other
	BCAR1	breast cancer anti-estrogen resistance 1	1.06e-05	1.501	Plasma Membrane	other
	NFYC	nuclear transcription factor Y, gamma	6.59e-06	1.501	Nucleus	transcription regulator
	GLG1 (includes EG:20340)	golgi glycoprotein 1	0.0001	1.499	Cytoplasm	other
	OPTN	optineurin	1.73e-07	1.498	Cytoplasm	other
	DOCK9	--	5.53e-05	1.497	Cytoplasm	other
	GALM	galactose mutarotase (aldose 1-epimerase)	7.27e-07	1.496	Cytoplasm	enzyme
	HNRNPA2B1	heterogeneous nuclear ribonucleoprotein A2/B1	0.000436	1.495	Nucleus	other
	SDC1	syndecan 1	0.000115	1.495	Plasma Membrane	other
	CPT2	carnitine palmitoyltransferase 2	0.000368	1.493	Cytoplasm	enzyme
	RASGRP1	RAS guanyl releasing protein 1 (calcium and DAG-regulated)	1.82e-05	1.492	Cytoplasm	other
	SERINC1	serine incorporator 1	8.77e-05	1.492	Plasma Membrane	transporter
	UNC93B1	unc-93 homolog B1 (C. elegans)	5.91e-06	1.491	Cytoplasm	other
	AQR	aquarius homolog (mouse)	0.000348	1.488	Nucleus	other
	NDUFA5	NADH dehydrogenase (ubiquinone) 1 alpha subcomplex, 5, 13kDa	4.47e-05	1.488	Cytoplasm	enzyme
	LAP3	leucine aminopeptidase 3	2.06e-07	1.487	Cytoplasm	peptidase
	PSEN1	presenilin 1	4.73e-05	1.487	Plasma Membrane	peptidase
	RHOQ	ras homolog gene family, member Q	2.8e-05	1.486	Plasma Membrane	enzyme
	USP9X	ubiquitin specific peptidase 9, X-linked	5.9e-05	1.486	Plasma Membrane	peptidase
	HLA-DMA	major histocompatibility complex, class II, DM alpha	2.91e-05	1.485	Plasma Membrane	transmembrane receptor
	NSF	N-ethylmaleimide-sensitive factor	1.81e-05	1.484	Cytoplasm	transporter
	BTK	Bruton agammaglobulinemia tyrosine kinase	0.000157	1.482	Cytoplasm	kinase
	ORAI1	ORAI calcium release-activated calcium modulator 1	7.88e-05	1.481	Plasma Membrane	ion channel
	SYNE1	spectrin repeat containing, nuclear envelope 1	3.88e-06	1.481	Nucleus	other
	IVNS1ABP	influenza virus NS1A binding protein	2.35e-05	1.48	Nucleus	other
	PDK4	pyruvate dehydrogenase kinase, isozyme 4	7.77e-05	1.48	Cytoplasm	kinase
	VPS13D	vacuolar protein sorting 13 homolog D (S. cerevisiae)	0.000433	1.479	unknown	other
	LRRC8B	leucine rich repeat containing 8 family, member B	4.81e-07	1.478	unknown	other
	TMBIM4	transmembrane BAX inhibitor motif containing 4	2.59e-05	1.478	Nucleus	other
	S100A6	S100 calcium binding protein A6	9.59e-05	1.477	Cytoplasm	transporter
	B3GNT2	UDP-GlcNAc:betaGal beta-1,3-N-acetylglucosaminyltransferase 2	1.62e-05	1.477	Cytoplasm	enzyme
	UPF2	UPF2 regulator of nonsense transcripts homolog (yeast)	0.000232	1.475	Cytoplasm	other
	PTPRG	protein tyrosine phosphatase, receptor type, G	0.000258	1.474	Plasma Membrane	phosphatase
	ZDHHC23	zinc finger, DHHC-type containing 23	0.000374	1.472	unknown	other
	LIN54	lin-54 homolog (C. elegans)	9.33e-05	1.47	unknown	other
	SLC15A1	solute carrier family 15 (oligopeptide transporter), member 1	2.04e-05	1.469	Plasma Membrane	transporter
	ATG9A	ATG9 autophagy related 9 homolog A (S. cerevisiae)	5.19e-05	1.467	Cytoplasm	other
	TDP2	tyrosyl-DNA phosphodiesterase 2	1.02e-05	1.467	Cytoplasm	transcription regulator
	TSTA3	tissue specific transplantation antigen P35B	1.3e-05	1.466	Plasma Membrane	enzyme
	C10orf26	chromosome 10 open reading frame 26	1.31e-05	1.465	unknown	other
	Gnas (mouse)	GNAS (guanine nucleotide binding protein, alpha stimulating) complex locus	0.000462	1.465	Plasma Membrane	enzyme
	MRPL15	mitochondrial ribosomal protein L15	3.54e-05	1.465	Cytoplasm	other
	ALDOB	aldolase B, fructose-bisphosphate	2.59e-05	1.462	Cytoplasm	enzyme
	C10orf76	chromosome 10 open reading frame 76	2.55e-05	1.462	unknown	other
	VPS16	vacuolar protein sorting 16 homolog (S. cerevisiae)	0.000429	1.458	Cytoplasm	transporter
	THOC5	THO complex 5	0.00018	1.456	Cytoplasm	other
	GSTO1	glutathione S-transferase omega 1	6.2e-05	1.455	Cytoplasm	enzyme
	PSMD1	proteasome (prosome, macropain) 26S subunit, non-ATPase, 1	0.000156	1.455	Cytoplasm	other
	TBC1D24	TBC1 domain family, member 24	2.32e-05	1.454	unknown	other
	RFNG	RFNG O-fucosylpeptide 3-beta-N-acetylglucosaminyltransferase	0.000153	1.453	Cytoplasm	enzyme
	SPPL2A	signal peptide peptidase-like 2A	0.000243	1.453	Plasma Membrane	peptidase
	AKR1B1	aldo-keto reductase family 1, member B1 (aldose reductase)	7.26e-06	1.45	Cytoplasm	enzyme
	PPP2CA	protein phosphatase 2, catalytic subunit, alpha isozyme	2.48e-07	1.45	Cytoplasm	phosphatase
	SLMO2	slowmo homolog 2 (Drosophila)	6.48e-06	1.449	unknown	other
	DPP8	dipeptidyl-peptidase 8	1.14e-06	1.446	Cytoplasm	peptidase
	TANC1	tetratricopeptide repeat, ankyrin repeat and coiled-coil containing 1	1.18e-06	1.445	unknown	other
	C1GALT1	core 1 synthase, glycoprotein-N-acetylgalactosamine 3-beta-galactosyltransferase, 1	0.000226	1.443	Plasma Membrane	enzyme
	GC	group-specific component (vitamin D binding protein)	4.37e-05	1.442	Extracellular Space	transporter
	ZRANB1	zinc finger, RAN-binding domain containing 1	5.24e-06	1.44	Nucleus	other
	SLC40A1	solute carrier family 40 (iron-regulated transporter), member 1	1.34e-05	1.439	Plasma Membrane	transporter
	DLST	dihydrolipoamide S-succinyltransferase (E2 component of 2-oxo-glutarate complex)	0.000104	1.438	Cytoplasm	enzyme
	MOSPD1	--	6.08e-05	1.437	unknown	other
	KIAA1191	KIAA1191	0.000283	1.437	unknown	other
	PLRG1	pleiotropic regulator 1	0.000165	1.437	Nucleus	transcription regulator
	TMEM104	transmembrane protein 104	5.34e-05	1.437	unknown	transporter
	GDPD2	glycerophosphodiester phosphodiesterase domain containing 2	1.05e-05	1.436	Plasma Membrane	enzyme
	SGMS1	sphingomyelin synthase 1	9.79e-06	1.436	Cytoplasm	enzyme
	DROSHA	drosha, ribonuclease type III	7.54e-06	1.435	Nucleus	enzyme
	ATP6AP2	ATPase, H+ transporting, lysosomal accessory protein 2	9.18e-05	1.434	Cytoplasm	transporter
	TATDN1	TatD DNase domain containing 1	3.26e-05	1.433	unknown	other
	TSNAX	translin-associated factor X	7.29e-06	1.432	Nucleus	transporter
	VAT1	vesicle amine transport protein 1 homolog (T. californica)	0.000273	1.432	Plasma Membrane	transporter
	EIF4H	eukaryotic translation initiation factor 4H	9.59e-06	1.43	Cytoplasm	translation regulator
	PKN2	protein kinase N2	0.000449	1.426	Cytoplasm	kinase
	LTA4H	leukotriene A4 hydrolase	0.000202	1.423	Cytoplasm	enzyme
	C18orf1	chromosome 18 open reading frame 1	0.000242	1.422	unknown	other
	RABGGTB	Rab geranylgeranyltransferase, beta subunit	4.61e-05	1.422	Cytoplasm	enzyme
	AK2	adenylate kinase 2	1.48e-05	1.421	Cytoplasm	kinase
	C22orf32	chromosome 22 open reading frame 32	1.82e-06	1.421	Extracellular Space	other
	DISP1	dispatched homolog 1 (Drosophila)	0.00015	1.419	Plasma Membrane	transporter
	UCK1	uridine-cytidine kinase 1	0.000212	1.416	unknown	kinase
	COPB2	coatomer protein complex, subunit beta 2 (beta prime)	6.76e-06	1.414	Cytoplasm	transporter
	TTLL1	tubulin tyrosine ligase-like family, member 1	1.84e-06	1.414	unknown	enzyme
	COX7C	--	4.87e-06	1.412	Cytoplasm	enzyme
	SPATS2L	spermatogenesis associated, serine-rich 2-like	2.71e-05	1.412	unknown	other
	EIF4E3	eukaryotic translation initiation factor 4E family member 3	0.000194	1.411	Cytoplasm	translation regulator
	FBXL3	F-box and leucine-rich repeat protein 3	5.99e-05	1.411	Nucleus	enzyme
	LOC81691	exonuclease NEF-sp	2.91e-05	1.41	Nucleus	enzyme
	IL1R1	interleukin 1 receptor, type I	0.000182	1.41	Plasma Membrane	transmembrane receptor
	MAU2	MAU2 chromatid cohesion factor homolog (C. elegans)	6.44e-05	1.41	Nucleus	other
	GPR55	G protein-coupled receptor 55	0.000121	1.407	Plasma Membrane	G-protein coupled receptor
	SHMT1	serine hydroxymethyltransferase 1 (soluble)	0.000262	1.407	Cytoplasm	enzyme
	COPS4	COP9 constitutive photomorphogenic homolog subunit 4 (Arabidopsis)	0.000363	1.405	Cytoplasm	other
	PLEKHA2	pleckstrin homology domain containing, family A (phosphoinositide binding specific) member 2	5.15e-07	1.405	Cytoplasm	other
	PRRC1	proline-rich coiled-coil 1	6.56e-06	1.405	unknown	other
	GDPD4	glycerophosphodiester phosphodiesterase domain containing 4	0.000146	1.404	unknown	kinase
	IKZF2	IKAROS family zinc finger 2 (Helios)	4.05e-06	1.404	Nucleus	transcription regulator
	ZFHX3	zinc finger homeobox 3	3.81e-05	1.404	Nucleus	transcription regulator
	E4F1	E4F transcription factor 1	0.000126	1.403	Nucleus	transcription regulator
	TOMM34	translocase of outer mitochondrial membrane 34	8.21e-06	1.403	Cytoplasm	other
	CEBPG	CCAAT/enhancer binding protein (C/EBP), gamma	3.61e-06	1.402	Nucleus	transcription regulator
	C1QA	complement component 1, q subcomponent, A chain	0.000173	1.401	Extracellular Space	other
	LGALS8	lectin, galactoside-binding, soluble, 8	3.67e-07	1.401	Extracellular Space	other
	NANS	N-acetylneuraminic acid synthase	6.83e-06	1.4	Cytoplasm	enzyme
	UFM1	ubiquitin-fold modifier 1	3.57e-05	1.4	Cytoplasm	other
	B2M	beta-2-microglobulin	6.01e-07	1.397	Plasma Membrane	transmembrane receptor
	DECR1	2,4-dienoyl CoA reductase 1, mitochondrial	0.000272	1.395	Cytoplasm	enzyme
	SGPL1	sphingosine-1-phosphate lyase 1	3.72e-05	1.395	Cytoplasm	enzyme
	ERI3	ERI1 exoribonuclease family member 3	5.34e-05	1.394	Plasma Membrane	other
	C20orf11	chromosome 20 open reading frame 11	0.000216	1.391	Nucleus	other
	TRIM8	tripartite motif containing 8	9.63e-05	1.39	Nucleus	other
	RBBP6	--	6.17e-07	1.389	Nucleus	other
	SH3KBP1	SH3-domain kinase binding protein 1	8.16e-06	1.387	Cytoplasm	other
	FAM35A	family with sequence similarity 35, member A	0.000477	1.385	unknown	other
	TMEM229B	transmembrane protein 229B	0.000316	1.384	unknown	other
	ACAA1	acetyl-CoA acyltransferase 1	5.56e-05	1.383	Cytoplasm	enzyme
	ALG8	asparagine-linked glycosylation 8, alpha-1,3-glucosyltransferase homolog (S. cerevisiae)	6.75e-06	1.383	Cytoplasm	enzyme
	SDF4	stromal cell derived factor 4	0.00015	1.383	Cytoplasm	other
	ZBTB1	zinc finger and BTB domain containing 1	8.4e-05	1.383	Nucleus	other
	BST1	bone marrow stromal cell antigen 1	6.36e-05	1.382	Plasma Membrane	enzyme
	CD3E	CD3e molecule, epsilon (CD3-TCR complex)	3.31e-05	1.382	Plasma Membrane	transmembrane receptor
	MAPK14	mitogen-activated protein kinase 14	1.54e-05	1.382	Cytoplasm	kinase
	FDFT1	farnesyl-diphosphate farnesyltransferase 1	1.29e-05	1.381	Cytoplasm	enzyme
	SAMM50	sorting and assembly machinery component 50 homolog (S. cerevisiae)	7.75e-05	1.381	Cytoplasm	other
	ABCA1	ATP-binding cassette, sub-family A (ABC1), member 1	2e-05	1.38	Plasma Membrane	transporter
	C9orf80	chromosome 9 open reading frame 80	3.75e-05	1.38	Nucleus	other
	HSD17B10	hydroxysteroid (17-beta) dehydrogenase 10	7.44e-07	1.38	Cytoplasm	enzyme
	ANKRD28	ankyrin repeat domain 28	0.000138	1.379	unknown	other
	FTH1	ferritin, heavy polypeptide 1	2.09e-06	1.379	Cytoplasm	enzyme
	RPE	ribulose-5-phosphate-3-epimerase	5.51e-07	1.379	unknown	enzyme
	APOA4	apolipoprotein A-IV	1.37e-07	1.378	Extracellular Space	transporter
	ZNF652	zinc finger protein 652	0.000252	1.378	unknown	other
	IRAK2	interleukin-1 receptor-associated kinase 2	1.37e-05	1.377	Plasma Membrane	kinase
	OCRL	oculocerebrorenal syndrome of Lowe	2.52e-05	1.377	Cytoplasm	phosphatase
	PPPDE1	PPPDE peptidase domain containing 1	7.32e-05	1.376	unknown	other
	SMYD4	SET and MYND domain containing 4	6.43e-06	1.376	unknown	other
	WASL	Wiskott-Aldrich syndrome-like	8.62e-05	1.373	Cytoplasm	other
	CREB3L3	cAMP responsive element binding protein 3-like 3	8.4e-06	1.372	unknown	other
	CRIPT	cysteine-rich PDZ-binding protein	1.08e-05	1.372	Cytoplasm	other
	DOPEY2	dopey family member 2	0.000267	1.37	Cytoplasm	other
	CLDN2	claudin 2	0.000371	1.369	Plasma Membrane	other
	MFN2	mitofusin 2	6.98e-05	1.367	Cytoplasm	enzyme
	NDE1	nudE nuclear distribution gene E homolog 1 (A. nidulans)	6.97e-05	1.367	Nucleus	other
	YARS	tyrosyl-tRNA synthetase	2.4e-05	1.367	Cytoplasm	enzyme
	PTPN6	protein tyrosine phosphatase, non-receptor type 6	3.16e-06	1.363	Cytoplasm	phosphatase
	ZNF828	zinc finger protein 828	1.92e-05	1.363	unknown	other
	RBBP4	retinoblastoma binding protein 4	1.44e-06	1.362	Nucleus	enzyme
	UEVLD	UEV and lactate/malate dehyrogenase domains	1.99e-05	1.361	Cytoplasm	enzyme
	RCAN3	RCAN family member 3	0.00031	1.359	unknown	other
	CASC4	cancer susceptibility candidate 4	4.3e-05	1.358	unknown	other
	TMEM45B	transmembrane protein 45B	0.000157	1.358	Extracellular Space	other
	UFD1L	ubiquitin fusion degradation 1 like (yeast)	9.59e-06	1.358	Cytoplasm	peptidase
	UBAC2	UBA domain containing 2	1.48e-05	1.357	unknown	other
	EHMT1	euchromatic histone-lysine N-methyltransferase 1	1.6e-05	1.356	Nucleus	transcription regulator
	PANK3	pantothenate kinase 3	3.08e-05	1.356	Cytoplasm	kinase
	HS1BP3	HCLS1 binding protein 3	0.000121	1.353	unknown	other
	SLC4A7	solute carrier family 4, sodium bicarbonate cotransporter, member 7	1.58e-07	1.353	Plasma Membrane	transporter
	HMGN2	high mobility group nucleosomal binding domain 2	8.96e-07	1.352	Nucleus	other
	SC4MOL	sterol-C4-methyl oxidase-like	6.02e-05	1.352	Cytoplasm	enzyme
	MGEA5	meningioma expressed antigen 5 (hyaluronidase)	0.000235	1.351	unknown	enzyme
	ADRB2	adrenergic, beta-2-, receptor, surface	3.98e-05	1.349	Plasma Membrane	G-protein coupled receptor
	CCDC28A	coiled-coil domain containing 28A	5.34e-05	1.349	unknown	other
	TAF5L	TAF5-like RNA polymerase II, p300/CBP-associated factor (PCAF)-associated factor, 65kDa	1.37e-05	1.347	Nucleus	transcription regulator
	MMS19	MMS19 nucleotide excision repair homolog (S. cerevisiae)	0.000335	1.343	Nucleus	transcription regulator
	ADAM33	ADAM metallopeptidase domain 33	8.27e-06	1.342	Plasma Membrane	peptidase
	DBI	diazepam binding inhibitor (GABA receptor modulator, acyl-CoA binding protein)	2.46e-05	1.342	Cytoplasm	other
	DNM1L	dynamin 1-like	3.72e-05	1.341	Cytoplasm	enzyme
	MPST	mercaptopyruvate sulfurtransferase	3.56e-06	1.34	Cytoplasm	enzyme
	AARS	alanyl-tRNA synthetase	0.000113	1.339	Cytoplasm	enzyme
	SNX6	sorting nexin 6	1.77e-05	1.339	Cytoplasm	transporter
	ALDH2	aldehyde dehydrogenase 2 family (mitochondrial)	6.9e-05	1.338	Cytoplasm	enzyme
	EDF1	endothelial differentiation-related factor 1	1.95e-05	1.337	Nucleus	transcription regulator
	PLA2G12B	phospholipase A2, group XIIB	1.08e-06	1.337	Extracellular Space	enzyme
	ITFG3	integrin alpha FG-GAP repeat containing 3	9.78e-05	1.331	unknown	other
	POLR1B	polymerase (RNA) I polypeptide B, 128kDa	6.74e-05	1.331	Nucleus	enzyme
	CACHD1	cache domain containing 1	5.99e-05	1.329	unknown	other
	RNPS1	RNA binding protein S1, serine-rich domain	5.47e-06	1.323	Nucleus	other
	PRPF3	PRP3 pre-mRNA processing factor 3 homolog (S. cerevisiae)	0.00023	1.322	Nucleus	other
	KLHL15	kelch-like 15 (Drosophila)	0.000446	1.321	unknown	other
	RTN4	reticulon 4	1.3e-05	1.321	Cytoplasm	other
	FBXL5	F-box and leucine-rich repeat protein 5	4.86e-05	1.32	Cytoplasm	enzyme
	SPG7	spastic paraplegia 7 (pure and complicated autosomal recessive)	0.000346	1.32	Cytoplasm	peptidase
	SNAP47	synaptosomal-associated protein, 47kDa	3.46e-05	1.32	unknown	other
	C3orf38	chromosome 3 open reading frame 38	9.73e-05	1.319	unknown	peptidase
	NCBP2	nuclear cap binding protein subunit 2, 20kDa	0.000407	1.317	Nucleus	other
	STAM2	signal transducing adaptor molecule (SH3 domain and ITAM motif) 2	7.39e-06	1.317	Cytoplasm	other
	AHCYL1	adenosylhomocysteinase-like 1	7.64e-05	1.315	Cytoplasm	enzyme
	AGR2	anterior gradient homolog 2 (Xenopus laevis)	6.24e-05	1.314	Extracellular Space	other
	ATP6V0A2	ATPase, H+ transporting, lysosomal V0 subunit a2	9.56e-05	1.313	Cytoplasm	transporter
	SPCS2	signal peptidase complex subunit 2 homolog (S. cerevisiae)	0.000108	1.309	Cytoplasm	other
	PMM2	phosphomannomutase 2	0.000379	1.308	Cytoplasm	enzyme
	ARHGAP10	Rho GTPase activating protein 10	0.000406	1.308	Cytoplasm	other
	KIAA0664	KIAA0664	0.000201	1.306	Cytoplasm	translation regulator
	SDHA	succinate dehydrogenase complex, subunit A, flavoprotein (Fp)	3.72e-05	1.305	Cytoplasm	enzyme
	FAM117B	family with sequence similarity 117, member B	0.00023	1.304	unknown	other
	CCL5	chemokine (C-C motif) ligand 5	0.000173	1.303	Extracellular Space	cytokine
	SMCR7	Smith-Magenis syndrome chromosome region, candidate 7	0.000137	1.303	unknown	other
	GGCT	gamma-glutamylcyclotransferase	5.86e-05	1.302	Cytoplasm	other
	SUN1	Sad1 and UNC84 domain containing 1	0.000239	1.302	Nucleus	other
	PHF3	PHD finger protein 3	7.87e-05	1.301	Nucleus	other
	DOCK2	dedicator of cytokinesis 2	0.000401	1.299	Cytoplasm	other
	PPAPDC1B	phosphatidic acid phosphatase type 2 domain containing 1B	0.00031	1.299	unknown	other
	LDHA	lactate dehydrogenase A	0.000463	1.297	Cytoplasm	enzyme
	CYTIP	cytohesin 1 interacting protein	0.000201	1.296	Cytoplasm	other
	ALAS1	aminolevulinate, delta-, synthase 1	6.09e-06	1.293	Cytoplasm	enzyme
	KIF5B	kinesin family member 5B	1.92e-05	1.292	Cytoplasm	other
	PSMD14	proteasome (prosome, macropain) 26S subunit, non-ATPase, 14	0.000457	1.289	Cytoplasm	peptidase
	CDO1	cysteine dioxygenase, type I	0.000112	1.288	Cytoplasm	enzyme
	FAM135A	family with sequence similarity 135, member A	0.000198	1.286	unknown	enzyme
	NONO	non-POU domain containing, octamer-binding	0.000396	1.286	Nucleus	other
	SAT1	spermidine/spermine N1-acetyltransferase 1	2.95e-05	1.286	Cytoplasm	enzyme
	B3GNT5	UDP-GlcNAc:betaGal beta-1,3-N-acetylglucosaminyltransferase 5	5.21e-05	1.284	unknown	enzyme
	ARHGAP12	Rho GTPase activating protein 12	4.25e-05	1.282	Cytoplasm	other
	MAPT	--	0.000202	1.281	Cytoplasm	other
	C2orf3	chromosome 2 open reading frame 3	0.000202	1.279	Nucleus	transcription regulator
	CYFIP2	cytoplasmic FMR1 interacting protein 2	1.23e-05	1.279	Cytoplasm	other
	ANKS1A	ankyrin repeat and sterile alpha motif domain containing 1A	2.54e-05	1.278	Cytoplasm	other
	C12orf4	chromosome 12 open reading frame 4	1.63e-05	1.277	unknown	other
	HMOX1	heme oxygenase (decycling) 1	3.14e-06	1.277	Cytoplasm	enzyme
	HEXA	hexosaminidase A (alpha polypeptide)	0.000343	1.277	Cytoplasm	enzyme
	HCLS1	hematopoietic cell-specific Lyn substrate 1	9.16e-05	1.276	Nucleus	transcription regulator
	SECISBP2	SECIS binding protein 2	6.55e-05	1.276	Cytoplasm	translation regulator
	WDR45L	WDR45-like	5.07e-05	1.276	unknown	other
	MUTED	muted homolog (mouse)	0.000147	1.273	unknown	other
	DKK2	dickkopf homolog 2 (Xenopus laevis)	5.84e-05	1.27	Extracellular Space	other
	MLL	myeloid/lymphoid or mixed-lineage leukemia (trithorax homolog, Drosophila)	0.000498	1.27	Nucleus	transcription regulator
	PPP1R7	protein phosphatase 1, regulatory (inhibitor) subunit 7	1.97e-06	1.27	Nucleus	phosphatase
	C3orf63	chromosome 3 open reading frame 63	1.15e-05	1.269	unknown	other
	SLC9A2	solute carrier family 9 (sodium/hydrogen exchanger), member 2	1.39e-05	1.269	Plasma Membrane	transporter
	AKR7A2	aldo-keto reductase family 7, member A2 (aflatoxin aldehyde reductase)	2.09e-05	1.268	Cytoplasm	enzyme
	CLPX	ClpX caseinolytic peptidase X homolog (E. coli)	8.2e-06	1.268	Cytoplasm	enzyme
	MAP3K7	mitogen-activated protein kinase kinase kinase 7	1.63e-05	1.267	Cytoplasm	kinase
	BRD7	bromodomain containing 7	4.42e-05	1.265	Nucleus	other
	ORC3	origin recognition complex, subunit 3	0.000398	1.263	Nucleus	other
	ARL4A	ADP-ribosylation factor-like 4A	0.000189	1.261	Nucleus	enzyme
	ABCE1	ATP-binding cassette, sub-family E (OABP), member 1	0.000274	1.261	Cytoplasm	transporter
	TBCA	tubulin folding cofactor A	2.84e-05	1.259	Cytoplasm	other
	TNFSF10	tumor necrosis factor (ligand) superfamily, member 10	1.68e-05	1.258	Extracellular Space	cytokine
	GPD1	glycerol-3-phosphate dehydrogenase 1 (soluble)	0.000202	1.256	Cytoplasm	enzyme
	SHISA5	shisa homolog 5 (Xenopus laevis)	0.000337	1.254	Nucleus	other
	ALG13	--	8.8e-05	1.252	Cytoplasm	other
	PRPF6	PRP6 pre-mRNA processing factor 6 homolog (S. cerevisiae)	2.98e-07	1.251	Nucleus	transcription regulator
	KIF1B	kinesin family member 1B	0.000139	1.25	Cytoplasm	transporter
	OTUD4	OTU domain containing 4	0.000239	1.25	unknown	other
	TSPAN13	tetraspanin 13	6.56e-06	1.249	Plasma Membrane	other
	CD3D	CD3d molecule, delta (CD3-TCR complex)	6.79e-05	1.248	Plasma Membrane	transmembrane receptor
	B3GALNT1	beta-1,3-N-acetylgalactosaminyltransferase 1 (globoside blood group)	8.33e-06	1.246	Cytoplasm	enzyme
	FUBP1	far upstream element (FUSE) binding protein 1	0.0003	1.245	Nucleus	transcription regulator
	SLC36A1	solute carrier family 36 (proton/amino acid symporter), member 1	0.000177	1.245	Plasma Membrane	transporter
	STX7	syntaxin 7	5.32e-05	1.245	Plasma Membrane	transporter
	SATB1	SATB homeobox 1	0.000253	1.244	Nucleus	transcription regulator
	C10orf119	minichromosome maintenance complex binding protein	0.000362	1.243	Nucleus	other
	C12orf49	chromosome 12 open reading frame 49	6.85e-05	1.242	unknown	other
	LCP2	lymphocyte cytosolic protein 2 (SH2 domain containing leukocyte protein of 76kDa)	0.000185	1.242	Cytoplasm	other
	USP5	ubiquitin specific peptidase 5 (isopeptidase T)	2.98e-05	1.242	Cytoplasm	peptidase
	TNPO3	transportin 3	0.000198	1.239	Cytoplasm	other
	OASL	2'-5'-oligoadenylate synthetase-like	0.000258	1.238	Cytoplasm	enzyme
	CCDC53	coiled-coil domain containing 53	0.000133	1.238	Cytoplasm	other
	SLC2A5	solute carrier family 2 (facilitated glucose/fructose transporter), member 5	8.1e-06	1.237	Plasma Membrane	transporter
	ZADH2	zinc binding alcohol dehydrogenase domain containing 2	5.28e-05	1.237	Cytoplasm	enzyme
	BLMH	bleomycin hydrolase	0.000423	1.235	Cytoplasm	peptidase
	SQSTM1	sequestosome 1	3.33e-05	1.234	Cytoplasm	transcription regulator
	C5orf4	chromosome 5 open reading frame 4	0.000191	1.23	unknown	other
	PHLPP2	PH domain and leucine rich repeat protein phosphatase 2	0.000141	1.229	Cytoplasm	enzyme
	RIN2	Ras and Rab interactor 2	0.000151	1.228	Cytoplasm	other
	SOAT1	sterol O-acyltransferase 1	0.000395	1.226	Cytoplasm	enzyme
	CCT4	chaperonin containing TCP1, subunit 4 (delta)	0.000376	1.224	Cytoplasm	other
	CD69	CD69 molecule	6.41e-05	1.223	Plasma Membrane	transmembrane receptor
	DPYD	dihydropyrimidine dehydrogenase	6.86e-05	1.223	Cytoplasm	enzyme
	HINT1	histidine triad nucleotide binding protein 1	6.81e-05	1.223	Nucleus	enzyme
	UBA2	ubiquitin-like modifier activating enzyme 2	0.00031	1.223	Cytoplasm	enzyme
	ACSL1	acyl-CoA synthetase long-chain family member 1	2.95e-06	1.221	Cytoplasm	enzyme
	RNF146	ring finger protein 146	0.000269	1.22	unknown	other
	NDUFS3	NADH dehydrogenase (ubiquinone) Fe-S protein 3, 30kDa (NADH-coenzyme Q reductase)	0.000454	1.218	Cytoplasm	enzyme
	PARP14	poly (ADP-ribose) polymerase family, member 14	0.000151	1.218	Cytoplasm	other
	AZIN1	antizyme inhibitor 1	9.26e-05	1.217	Cytoplasm	enzyme
	RNF185	ring finger protein 185	0.000428	1.215	unknown	other
	TPM1	tropomyosin 1 (alpha)	0.000444	1.215	Cytoplasm	other
	SETD5	SET domain containing 5	0.000444	1.214	unknown	other
	FAM134A	family with sequence similarity 134, member A	0.000169	1.212	unknown	other
	ARHGAP18	Rho GTPase activating protein 18	0.000131	1.211	unknown	other
	PAFAH1B1	platelet-activating factor acetylhydrolase 1b, regulatory subunit 1 (45kDa)	0.00013	1.207	Cytoplasm	enzyme
	UQCRFS1	ubiquinol-cytochrome c reductase, Rieske iron-sulfur polypeptide 1	0.000237	1.207	Cytoplasm	enzyme
	PHAX	phosphorylated adaptor for RNA export	3.33e-05	1.204	Cytoplasm	other
	XRCC6BP1	XRCC6 binding protein 1	0.000188	1.204	unknown	kinase
	ACTN1	actinin, alpha 1	2.16e-06	1.201	Cytoplasm	other
	SIGIRR	single immunoglobulin and toll-interleukin 1 receptor (TIR) domain	0.000111	1.198	Plasma Membrane	transmembrane receptor
	TAX1BP1	Tax1 (human T-cell leukemia virus type I) binding protein 1	0.000407	1.195	unknown	other
	CDX1	caudal type homeobox 1	0.0001	1.194	Nucleus	transcription regulator
	C19orf50	chromosome 19 open reading frame 50	6.07e-05	1.192	unknown	other
	PHYH	phytanoyl-CoA 2-hydroxylase	0.000301	1.191	Cytoplasm	enzyme
	EDN2	endothelin 2	0.000275	1.19	Extracellular Space	growth factor
	GORASP1	golgi reassembly stacking protein 1, 65kDa	0.000246	1.189	Cytoplasm	other
	REEP5	receptor accessory protein 5	0.000246	1.189	Extracellular Space	transporter
	NEK1	NIMA (never in mitosis gene a)-related kinase 1	0.000165	1.188	Nucleus	kinase
	TRAM1	translocation associated membrane protein 1	0.000168	1.187	Cytoplasm	other
	EIF4ENIF1	eukaryotic translation initiation factor 4E nuclear import factor 1	0.000128	1.183	Cytoplasm	translation regulator
	APEH	N-acylaminoacyl-peptide hydrolase	0.00012	1.182	Cytoplasm	peptidase
	YIPF5	Yip1 domain family, member 5	0.000327	1.181	unknown	other
	TMEM50B	transmembrane protein 50B	0.000209	1.18	Plasma Membrane	other
	ATP2B1	ATPase, Ca++ transporting, plasma membrane 1	0.000223	1.179	Plasma Membrane	transporter
	ZEB1	zinc finger E-box binding homeobox 1	0.000392	1.179	Nucleus	transcription regulator
	FBXO18	F-box protein, helicase, 18	0.000232	1.177	Nucleus	other
	TRA2A	transformer 2 alpha homolog (Drosophila)	0.000254	1.177	Nucleus	other
	SCFD1	sec1 family domain containing 1	0.000228	1.173	Cytoplasm	transporter
	TOMM22	translocase of outer mitochondrial membrane 22 homolog (yeast)	3.33e-05	1.169	Cytoplasm	transporter
	XPO5	exportin 5	5.86e-05	1.166	Nucleus	transporter
	TMTC1	transmembrane and tetratricopeptide repeat containing 1	9.22e-05	1.165	unknown	other
	PLEKHM1	pleckstrin homology domain containing, family M (with RUN domain) member 1	0.000177	1.163	Cytoplasm	other
	IFIH1	interferon induced with helicase C domain 1	0.000127	1.157	Nucleus	enzyme
	KIAA0174	KIAA0174	7.67e-05	1.156	unknown	other
	MTTP	microsomal triglyceride transfer protein	3.51e-05	1.155	Cytoplasm	transporter
	GPR34	G protein-coupled receptor 34	0.000491	1.152	Plasma Membrane	G-protein coupled receptor
	RASD1	RAS, dexamethasone-induced 1	8.77e-05	1.149	Cytoplasm	enzyme
	CDK5RAP1	CDK5 regulatory subunit associated protein 1	1.54e-05	1.147	Extracellular Space	other
	C6orf62	chromosome 6 open reading frame 62	0.000495	1.143	unknown	other
	GPR171	G protein-coupled receptor 171	0.000354	1.142	Plasma Membrane	G-protein coupled receptor
	HIRA	HIR histone cell cycle regulation defective homolog A (S. cerevisiae)	0.000135	1.142	Nucleus	transcription regulator
	MDH1	malate dehydrogenase 1, NAD (soluble)	0.000298	1.135	Cytoplasm	enzyme
	HSPA9	heat shock 70kDa protein 9 (mortalin)	0.000421	1.121	Cytoplasm	other
	CANT1	calcium activated nucleotidase 1	0.000149	1.096	Extracellular Space	enzyme
	ProSAPiP1	ProSAPiP1 protein	0.000136	-1.106	Cytoplasm	other
	CRYL1	crystallin, lambda 1	0.000245	-1.126	Cytoplasm	enzyme
	UBB	--	0.00042	-1.129	Cytoplasm	other
	ZNF318	zinc finger protein 318	0.000391	-1.13	Nucleus	other
	PPA2	pyrophosphatase (inorganic) 2	2.24e-05	-1.132	Cytoplasm	enzyme
	TRMT2A	TRM2 tRNA methyltransferase 2 homolog A (S. cerevisiae)	0.000448	-1.143	unknown	kinase
	SNX20	sorting nexin 20	0.00013	-1.146	unknown	other
	ERH	enhancer of rudimentary homolog (Drosophila)	0.000482	-1.15	Nucleus	other
	PEBP1	phosphatidylethanolamine binding protein 1	0.00027	-1.151	Cytoplasm	other
	TTC3	tetratricopeptide repeat domain 3	1.28e-05	-1.158	Cytoplasm	enzyme
	WARS	tryptophanyl-tRNA synthetase	2.99e-06	-1.166	Cytoplasm	enzyme
	AUTS2	autism susceptibility candidate 2	8.9e-05	-1.167	unknown	other
	AP3M1	adaptor-related protein complex 3, mu 1 subunit	9.68e-05	-1.169	Cytoplasm	transporter
	RPS4X	ribosomal protein S4, X-linked	8.87e-05	-1.17	Cytoplasm	other
	SAP30BP	SAP30 binding protein	0.000456	-1.172	Nucleus	transcription regulator
	ERN1	endoplasmic reticulum to nucleus signaling 1	0.000455	-1.173	Cytoplasm	kinase
	CAPN1	calpain 1, (mu/I) large subunit	0.000217	-1.175	Cytoplasm	peptidase
	TAF15	TAF15 RNA polymerase II, TATA box binding protein (TBP)-associated factor, 68kDa	0.000126	-1.176	Nucleus	transcription regulator
	COL4A3BP	collagen, type IV, alpha 3 (Goodpasture antigen) binding protein	0.000289	-1.185	Cytoplasm	kinase
	TGFBR2	transforming growth factor, beta receptor II (70/80kDa)	4.31e-05	-1.185	Plasma Membrane	kinase
	ACTB	actin, beta	0.000173	-1.187	Cytoplasm	other
	C17orf63	chromosome 17 open reading frame 63	0.00018	-1.188	unknown	other
	SPAG9	sperm associated antigen 9	8.78e-05	-1.189	Plasma Membrane	other
	NCDN	neurochondrin	8.61e-05	-1.191	Cytoplasm	other
	HSPC159	galectin-related protein	0.000108	-1.192	unknown	other
	ZZEF1	zinc finger, ZZ-type with EF-hand domain 1	0.000102	-1.192	unknown	other
	MARCH3	membrane-associated ring finger (C3HC4) 3	0.000289	-1.194	Cytoplasm	other
	TMEM106B	transmembrane protein 106B	0.000243	-1.194	unknown	other
	MYO6	myosin VI	0.000228	-1.196	Cytoplasm	other
	SLC7A6	solute carrier family 7 (cationic amino acid transporter, y+ system), member 6	0.000319	-1.197	Plasma Membrane	transporter
	LCP1	lymphocyte cytosolic protein 1 (L-plastin)	0.000194	-1.198	Cytoplasm	other
	RPL27	ribosomal protein L27	8e-05	-1.198	Cytoplasm	other
	RPS12	ribosomal protein S12	0.000435	-1.198	Cytoplasm	other
	RRBP1	ribosome binding protein 1 homolog 180kDa (dog)	0.000179	-1.198	Cytoplasm	transporter
	PLSCR1	phospholipid scramblase 1	0.000305	-1.199	Plasma Membrane	enzyme
	PLA2G10	phospholipase A2, group X	0.000499	-1.2	Cytoplasm	enzyme
	CASP1	caspase 1, apoptosis-related cysteine peptidase (interleukin 1, beta, convertase)	1.52e-06	-1.201	Cytoplasm	peptidase
	FARS2	phenylalanyl-tRNA synthetase 2, mitochondrial	0.000322	-1.201	Cytoplasm	enzyme
	SERPINI1	serpin peptidase inhibitor, clade I (neuroserpin), member 1	0.000165	-1.201	Extracellular Space	other
	WDR82	WD repeat domain 82	8.27e-07	-1.201	unknown	other
	GLB1	galactosidase, beta 1	3.11e-05	-1.202	Cytoplasm	enzyme
	THOC7	THO complex 7 homolog (Drosophila)	0.000281	-1.203	Nucleus	other
	ALDH6A1	aldehyde dehydrogenase 6 family, member A1	0.000463	-1.204	Cytoplasm	enzyme
	LONP1	lon peptidase 1, mitochondrial	7.9e-05	-1.204	Cytoplasm	peptidase
	UBE2R2	ubiquitin-conjugating enzyme E2R 2	0.000113	-1.205	unknown	enzyme
	NF1	neurofibromin 1	0.00014	-1.206	Cytoplasm	other
	AHSA1	AHA1, activator of heat shock 90kDa protein ATPase homolog 1 (yeast)	0.000195	-1.208	Cytoplasm	other
	RPS15	ribosomal protein S15	0.000284	-1.209	Cytoplasm	other
	YWHAG	tyrosine 3-monooxygenase/tryptophan 5-monooxygenase activation protein, gamma polypeptide	4.56e-05	-1.209	Cytoplasm	other
	ITPR2	inositol 1,4,5-trisphosphate receptor, type 2	0.000407	-1.212	Cytoplasm	ion channel
	POU2F1	POU class 2 homeobox 1	4.78e-05	-1.213	Nucleus	transcription regulator
	WIPF1	WAS/WASL interacting protein family, member 1	0.000301	-1.214	Cytoplasm	other
	MYL12A	myosin, light chain 12A, regulatory, non-sarcomeric	0.000103	-1.215	unknown	other
	ARHGDIA	Rho GDP dissociation inhibitor (GDI) alpha	3.11e-05	-1.216	Cytoplasm	other
	RNF166	ring finger protein 166	0.000242	-1.217	unknown	other
	SLC9A9	solute carrier family 9 (sodium/hydrogen exchanger), member 9	0.000149	-1.217	Cytoplasm	other
	ASPA	aspartoacylase	9.58e-05	-1.218	Cytoplasm	enzyme
	PGD	phosphogluconate dehydrogenase	0.000265	-1.218	Cytoplasm	enzyme
	AKR1A1	aldo-keto reductase family 1, member A1 (aldehyde reductase)	0.000133	-1.22	Cytoplasm	enzyme
	RGP1	RGP1 retrograde golgi transport homolog (S. cerevisiae)	0.000237	-1.22	unknown	other
	R3HDM1	R3H domain containing 1	5.55e-05	-1.222	unknown	other
	ZNF217	zinc finger protein 217	8.07e-05	-1.223	Nucleus	transcription regulator
	CENPC1	centromere protein C 1	0.000278	-1.224	Nucleus	other
	C15orf41	chromosome 15 open reading frame 41	1.43e-05	-1.226	unknown	other
	SH3BGRL	SH3 domain binding glutamic acid-rich protein like	4.47e-05	-1.227	Cytoplasm	other
	ACVR2A	activin A receptor, type IIA	2.55e-05	-1.228	Plasma Membrane	kinase
	PPP1R8	protein phosphatase 1, regulatory (inhibitor) subunit 8	0.000282	-1.228	Nucleus	phosphatase
	EG668300	ribosomal protein, large, P0, pseudogene 1	1.3e-05	-1.229	Cytoplasm	other
	PSMD7	proteasome (prosome, macropain) 26S subunit, non-ATPase, 7	2.31e-06	-1.23	Cytoplasm	other
	EEF2	eukaryotic translation elongation factor 2	2.04e-05	-1.233	Cytoplasm	translation regulator
	C1orf168	chromosome 1 open reading frame 168	6.39e-05	-1.239	unknown	other
	PEX6	peroxisomal biogenesis factor 6	5.1e-06	-1.239	Cytoplasm	enzyme
	CDC25A	cell division cycle 25 homolog A (S. pombe)	2.92e-05	-1.24	Nucleus	phosphatase
	RPS3A	ribosomal protein S3A	0.000461	-1.241	Cytoplasm	other
	LOC100131713	ribosomal protein L29 pseudogene 11	0.0001	-1.243	Cytoplasm	enzyme
	ATP1B1	ATPase, Na+/K+ transporting, beta 1 polypeptide	0.000303	-1.251	Plasma Membrane	transporter
	COPB1	coatomer protein complex, subunit beta 1	8.96e-07	-1.251	Cytoplasm	transporter
	FAM69B	family with sequence similarity 69, member B	0.000108	-1.251	unknown	other
	HERPUD2	HERPUD family member 2	0.000235	-1.251	unknown	other
	NAIF1	nuclear apoptosis inducing factor 1	6.9e-05	-1.251	Nucleus	other
	SI	sucrase-isomaltase (alpha-glucosidase)	1.29e-05	-1.251	Cytoplasm	enzyme
	PDRG1	p53 and DNA-damage regulated 1	6.19e-06	-1.252	Cytoplasm	other
	ATP6V1B2	ATPase, H+ transporting, lysosomal 56/58kDa, V1 subunit B2	3.09e-05	-1.253	Cytoplasm	transporter
	ACPL2	acid phosphatase-like 2	6.49e-05	-1.254	unknown	phosphatase
	YIPF4	Yip1 domain family, member 4	0.000132	-1.254	Cytoplasm	other
	VAMP4	vesicle-associated membrane protein 4	4.67e-05	-1.256	Cytoplasm	other
	DCAF13	DDB1 and CUL4 associated factor 13	1.13e-05	-1.257	Nucleus	other
	ZP1	zona pellucida glycoprotein 1 (sperm receptor)	0.000196	-1.257	Extracellular Space	other
	KPNA4	karyopherin alpha 4 (importin alpha 3)	8.1e-06	-1.259	Nucleus	transporter
	NPEPPS	aminopeptidase puromycin sensitive	0.000123	-1.261	Cytoplasm	peptidase
	ZCCHC11	zinc finger, CCHC domain containing 11	0.000177	-1.263	Nucleus	enzyme
	HIPK3	homeodomain interacting protein kinase 3	3.22e-06	-1.264	Nucleus	kinase
	FKBP4	FK506 binding protein 4, 59kDa	7.59e-05	-1.268	Nucleus	enzyme
	NDEL1	nudE nuclear distribution gene E homolog (A. nidulans)-like 1	0.000367	-1.27	Nucleus	other
	SRP54	signal recognition particle 54kDa	0.000157	-1.27	Cytoplasm	other
	ACOX3	acyl-CoA oxidase 3, pristanoyl	6.07e-05	-1.271	Cytoplasm	enzyme
	HEPH	hephaestin	3.25e-06	-1.271	Plasma Membrane	transporter
	TALDO1	transaldolase 1	2.91e-05	-1.271	Cytoplasm	enzyme
	ORC4	origin recognition complex, subunit 4	1.29e-05	-1.272	Nucleus	other
	TMEM180	transmembrane protein 180	0.000305	-1.273	unknown	other
	YWHAE	tyrosine 3-monooxygenase/tryptophan 5-monooxygenase activation protein, epsilon polypeptide	0.000153	-1.273	Cytoplasm	other
	OSTalpha	organic solute transporter alpha	1.54e-05	-1.275	Plasma Membrane	transporter
	CRTAM	cytotoxic and regulatory T cell molecule	0.000282	-1.277	Plasma Membrane	other
	XRN2	5'-3' exoribonuclease 2	0.000457	-1.278	Nucleus	enzyme
	AIMP2	aminoacyl tRNA synthetase complex-interacting multifunctional protein 2	0.000492	-1.279	Plasma Membrane	other
	EZH2	enhancer of zeste homolog 2 (Drosophila)	0.000324	-1.279	Nucleus	transcription regulator
	PINK1	PTEN induced putative kinase 1	0.000371	-1.279	Cytoplasm	kinase
	CCT5	chaperonin containing TCP1, subunit 5 (epsilon)	5.26e-05	-1.28	Cytoplasm	other
	RALA	v-ral simian leukemia viral oncogene homolog A (ras related)	0.000419	-1.28	Cytoplasm	enzyme
	RPL39	ribosomal protein L39	2.71e-05	-1.281	Cytoplasm	other
	SORBS1	sorbin and SH3 domain containing 1	1.63e-06	-1.282	Plasma Membrane	other
	ANKS4B	ankyrin repeat and sterile alpha motif domain containing 4B	0.000193	-1.283	Nucleus	transcription regulator
	DDOST	dolichyl-diphosphooligosaccharide--protein glycosyltransferase	0.000246	-1.285	Cytoplasm	enzyme
	RETSAT	retinol saturase (all-trans-retinol 13,14-reductase)	0.000157	-1.285	Cytoplasm	enzyme
	TNFSF8	tumor necrosis factor (ligand) superfamily, member 8	0.000362	-1.285	Extracellular Space	cytokine
	C1orf69	IBA57, iron-sulfur cluster assembly homolog (S. cerevisiae)	0.000246	-1.287	Cytoplasm	other
	GPR137B	G protein-coupled receptor 137B	1.6e-05	-1.289	Plasma Membrane	other
	SDCBP	syndecan binding protein (syntenin)	0.000194	-1.29	Plasma Membrane	enzyme
	TNFRSF1B	tumor necrosis factor receptor superfamily, member 1B	2.62e-05	-1.291	Plasma Membrane	transmembrane receptor
	SP3	Sp3 transcription factor	2.83e-05	-1.292	Nucleus	transcription regulator
	YWHAZ	tyrosine 3-monooxygenase/tryptophan 5-monooxygenase activation protein, zeta polypeptide	2.11e-05	-1.293	Cytoplasm	enzyme
	EXOC7	exocyst complex component 7	0.000374	-1.295	Plasma Membrane	transporter
	BTBD1	BTB (POZ) domain containing 1	0.000131	-1.296	Cytoplasm	other
	DPH5	DPH5 homolog (S. cerevisiae)	1.04e-05	-1.296	unknown	enzyme
	PLS3	plastin 3	0.000107	-1.298	Cytoplasm	other
	SERBP1	SERPINE1 mRNA binding protein 1	0.000267	-1.298	Nucleus	other
	TXNDC17	thioredoxin domain containing 17	0.000466	-1.298	Cytoplasm	enzyme
	DCTN1	dynactin 1	0.000105	-1.299	Cytoplasm	other
	DLG3	discs, large homolog 3 (Drosophila)	0.000149	-1.3	Plasma Membrane	kinase
	GABPA	GA binding protein transcription factor, alpha subunit 60kDa	9.27e-06	-1.3	Nucleus	transcription regulator
	PCDH1	protocadherin 1	0.000285	-1.303	Plasma Membrane	other
	EIF3M	eukaryotic translation initiation factor 3, subunit M	3.93e-05	-1.304	unknown	other
	RIF1	RAP1 interacting factor homolog (yeast)	2.66e-05	-1.305	Nucleus	other
	NUDT12	nudix (nucleoside diphosphate linked moiety X)-type motif 12	1.56e-05	-1.306	Cytoplasm	phosphatase
	RASA3	RAS p21 protein activator 3	1.85e-07	-1.306	Plasma Membrane	other
	SRRD	SRR1 domain containing	3.05e-06	-1.306	unknown	other
	ZWILCH	Zwilch, kinetochore associated, homolog (Drosophila)	1.05e-05	-1.306	Nucleus	other
	MARVELD2	MARVEL domain containing 2	3.78e-05	-1.307	unknown	other
	PARP1	poly (ADP-ribose) polymerase 1	0.000451	-1.307	Nucleus	enzyme
	NMI	N-myc (and STAT) interactor	6.62e-05	-1.308	Cytoplasm	transcription regulator
	GGT1	gamma-glutamyltransferase 1	0.000383	-1.309	Cytoplasm	enzyme
	RBMX	RNA binding motif protein, X-linked	0.000368	-1.31	Nucleus	other
	LOC158381	ATPase, class I, type 8B, member 5, pseudogene	0.000171	-1.312	Cytoplasm	enzyme
	SBNO2	strawberry notch homolog 2 (Drosophila)	3.94e-07	-1.312	unknown	other
	CD38	CD38 molecule	0.00012	-1.315	Plasma Membrane	enzyme
	CD74	CD74 molecule, major histocompatibility complex, class II invariant chain	5.58e-06	-1.315	Plasma Membrane	transmembrane receptor
	ACTL6A	actin-like 6A	0.000114	-1.316	Nucleus	other
	ARHGAP15	Rho GTPase activating protein 15	0.000112	-1.316	unknown	other
	CYTH1	cytohesin 1	3.41e-05	-1.317	Cytoplasm	other
	PTGS2	prostaglandin-endoperoxide synthase 2 (prostaglandin G/H synthase and cyclooxygenase)	0.00015	-1.317	Cytoplasm	enzyme
	THOC4	THO complex 4	0.000401	-1.317	Nucleus	transcription regulator
	CCDC134	coiled-coil domain containing 134	1.39e-05	-1.318	unknown	other
	SRP72	signal recognition particle 72kDa	3.31e-05	-1.318	Nucleus	kinase
	WIPI1	WD repeat domain, phosphoinositide interacting 1	1.06e-06	-1.318	Cytoplasm	other
	CYP46A1	cytochrome P450, family 46, subfamily A, polypeptide 1	2.1e-05	-1.319	Cytoplasm	enzyme
	RIPK1	receptor (TNFRSF)-interacting serine-threonine kinase 1	2.63e-05	-1.319	Plasma Membrane	kinase
	DMXL1	Dmx-like 1	4.77e-05	-1.321	unknown	other
	RPL22	ribosomal protein L22	6.48e-06	-1.321	Nucleus	other
	C14orf159	chromosome 14 open reading frame 159	8.18e-07	-1.322	Cytoplasm	other
	FAM162A	family with sequence similarity 162, member A	7.94e-05	-1.322	Cytoplasm	other
	HSPA8	heat shock 70kDa protein 8	0.000132	-1.323	Cytoplasm	enzyme
	MYO9B	myosin IXB	5.37e-05	-1.324	Cytoplasm	enzyme
	PHKB	phosphorylase kinase, beta	4.31e-06	-1.326	Cytoplasm	kinase
	PAAF1	proteasomal ATPase-associated factor 1	3.75e-05	-1.326	unknown	other
	DFNA5	deafness, autosomal dominant 5	6.99e-06	-1.329	unknown	other
	SH3GLB1	SH3-domain GRB2-like endophilin B1	4.75e-05	-1.33	Cytoplasm	enzyme
	PDPK1	3-phosphoinositide dependent protein kinase-1	2.85e-05	-1.331	Cytoplasm	kinase
	EGR1	early growth response 1	0.000158	-1.331	Nucleus	transcription regulator
	HPSE	heparanase	1.73e-05	-1.331	Plasma Membrane	enzyme
	SLC38A9	solute carrier family 38, member 9	7.42e-05	-1.332	unknown	other
	RNF10	ring finger protein 10	9.13e-07	-1.337	Cytoplasm	other
	SEMA6D	sema domain, transmembrane domain (TM), and cytoplasmic domain, (semaphorin) 6D	2.95e-05	-1.337	Plasma Membrane	other
	ADC	arginine decarboxylase	4.61e-05	-1.338	Cytoplasm	enzyme
	EEF1B2	eukaryotic translation elongation factor 1 beta 2	0.000223	-1.34	Cytoplasm	translation regulator
	GCC1	GRIP and coiled-coil domain containing 1	1.34e-05	-1.34	Cytoplasm	other
	NIPA2	non imprinted in Prader-Willi/Angelman syndrome 2	7.24e-06	-1.34	Cytoplasm	other
	RPS16	ribosomal protein S16	3.6e-06	-1.34	Cytoplasm	other
	HELB	helicase (DNA) B	5.36e-06	-1.341	Nucleus	enzyme
	SPTAN1	spectrin, alpha, non-erythrocytic 1 (alpha-fodrin)	5.34e-05	-1.341	Plasma Membrane	other
	MRPS7	mitochondrial ribosomal protein S7	0.000113	-1.342	Cytoplasm	other
	SLC25A24	solute carrier family 25 (mitochondrial carrier; phosphate carrier), member 24	1.95e-06	-1.342	Cytoplasm	other
	CD151	CD151 molecule (Raph blood group)	1.07e-05	-1.343	Plasma Membrane	other
	RPL4	ribosomal protein L4	8.84e-05	-1.343	Cytoplasm	enzyme
	TSHZ3	teashirt zinc finger homeobox 3	0.000191	-1.343	Nucleus	transcription regulator
	ACOT7	acyl-CoA thioesterase 7	2.55e-05	-1.346	Cytoplasm	enzyme
	CTNS	cystinosin, lysosomal cystine transporter	5.22e-05	-1.346	Cytoplasm	transporter
	RPS15A	--	5.25e-05	-1.348	Cytoplasm	other
	IL2RG	interleukin 2 receptor, gamma	2.73e-05	-1.348	Plasma Membrane	transmembrane receptor
	TXNDC16	thioredoxin domain containing 16	1.7e-06	-1.348	unknown	enzyme
	NUDT7	nudix (nucleoside diphosphate linked moiety X)-type motif 7	1.9e-05	-1.349	Cytoplasm	enzyme
	C6orf106	chromosome 6 open reading frame 106	7.03e-05	-1.35	unknown	other
	GBF1	golgi brefeldin A resistant guanine nucleotide exchange factor 1	2.4e-05	-1.35	Cytoplasm	other
	B4GALT5	UDP-Gal:betaGlcNAc beta 1,4- galactosyltransferase, polypeptide 5	7.44e-05	-1.351	Cytoplasm	enzyme
	WBP2	WW domain binding protein 2	8.86e-06	-1.351	Cytoplasm	other
	CCT2	chaperonin containing TCP1, subunit 2 (beta)	4.54e-05	-1.353	Cytoplasm	kinase
	MMGT1	membrane magnesium transporter 1	8.77e-05	-1.353	Cytoplasm	other
	CABIN1	calcineurin binding protein 1	8.46e-06	-1.354	Nucleus	other
	RPL14	ribosomal protein L14	1.57e-05	-1.354	Cytoplasm	other
	TRIM2	tripartite motif containing 2	9.79e-05	-1.355	Cytoplasm	other
	SYT4	synaptotagmin IV	0.000322	-1.357	Cytoplasm	transporter
	ATHL1	ATH1, acid trehalase-like 1 (yeast)	6.75e-06	-1.358	unknown	other
	PDLIM5	PDZ and LIM domain 5	7.13e-06	-1.358	Cytoplasm	other
	VPS4B	vacuolar protein sorting 4 homolog B (S. cerevisiae)	2.23e-06	-1.36	Cytoplasm	transporter
	C1QBP	complement component 1, q subcomponent binding protein	1.81e-05	-1.362	Cytoplasm	other
	C12orf51	chromosome 12 open reading frame 51	8.48e-05	-1.363	unknown	other
	MYEF2	myelin expression factor 2	4.81e-05	-1.363	Nucleus	transcription regulator
	GALNT6	UDP-N-acetyl-alpha-D-galactosamine:polypeptide N-acetylgalactosaminyltransferase 6 (GalNAc-T6)	4.84e-06	-1.363	Cytoplasm	enzyme
	PTGER4	prostaglandin E receptor 4 (subtype EP4)	0.0002	-1.365	Plasma Membrane	G-protein coupled receptor
	IRF1	interferon regulatory factor 1	0.000169	-1.366	Nucleus	transcription regulator
	SLC7A3	solute carrier family 7 (cationic amino acid transporter, y+ system), member 3	9.63e-05	-1.367	Plasma Membrane	transporter
	TMBIM1	transmembrane BAX inhibitor motif containing 1	1.28e-05	-1.368	unknown	other
	MYC	v-myc myelocytomatosis viral oncogene homolog (avian)	1.66e-07	-1.369	Nucleus	transcription regulator
	CNOT2	CCR4-NOT transcription complex, subunit 2	3.31e-05	-1.37	Nucleus	transcription regulator
	STX12	syntaxin 12	9.82e-07	-1.371	Plasma Membrane	other
	USP54	ubiquitin specific peptidase 54	6.71e-05	-1.371	unknown	peptidase
	CECR1	cat eye syndrome chromosome region, candidate 1	0.000204	-1.372	Extracellular Space	enzyme
	CADM1	cell adhesion molecule 1	0.000248	-1.372	Plasma Membrane	other
	EIF6	eukaryotic translation initiation factor 6	0.000401	-1.373	Cytoplasm	translation regulator
	AKAP13	A kinase (PRKA) anchor protein 13	1.56e-06	-1.374	Cytoplasm	other
	C1orf190	chromosome 1 open reading frame 190	1.47e-05	-1.374	unknown	other
	ELF1	E74-like factor 1 (ets domain transcription factor)	0.000197	-1.374	Nucleus	transcription regulator
	GH1	growth hormone 1	1.26e-05	-1.374	Extracellular Space	cytokine
	RECK	reversion-inducing-cysteine-rich protein with kazal motifs	1.9e-06	-1.377	Plasma Membrane	other
	SET	SET nuclear oncogene	1.35e-05	-1.377	Nucleus	phosphatase
	TSPAN8	tetraspanin 8	1.29e-05	-1.378	Plasma Membrane	other
	ADRM1	adhesion regulating molecule 1	9.43e-05	-1.379	Plasma Membrane	other
	NSDHL	NAD(P) dependent steroid dehydrogenase-like	5.15e-07	-1.379	Cytoplasm	enzyme
	RPS11	ribosomal protein S11	1.23e-05	-1.379	Cytoplasm	other
	RPS25	ribosomal protein S25	4.21e-06	-1.38	Cytoplasm	other
	WBP11	WW domain binding protein 11	0.000153	-1.38	Nucleus	phosphatase
	AP2A2	adaptor-related protein complex 2, alpha 2 subunit	9.55e-09	-1.383	Cytoplasm	transporter
	CDC5L	CDC5 cell division cycle 5-like (S. pombe)	6.49e-06	-1.383	Nucleus	other
	PLAC8	placenta-specific 8	2.71e-05	-1.383	Nucleus	other
	TXNDC5	thioredoxin domain containing 5 (endoplasmic reticulum)	0.000443	-1.383	Cytoplasm	enzyme
	ALDH9A1	aldehyde dehydrogenase 9 family, member A1	0.00029	-1.384	Cytoplasm	enzyme
	PARN	poly(A)-specific ribonuclease (deadenylation nuclease)	8.61e-05	-1.384	Nucleus	enzyme
	GINS3	GINS complex subunit 3 (Psf3 homolog)	1.95e-06	-1.385	unknown	other
	SF3B3	splicing factor 3b, subunit 3, 130kDa	0.000202	-1.385	Nucleus	other
	KDELR2	KDEL (Lys-Asp-Glu-Leu) endoplasmic reticulum protein retention receptor 2	1.39e-05	-1.388	Cytoplasm	transporter
	NDOR1	NADPH dependent diflavin oxidoreductase 1	2.98e-06	-1.388	Cytoplasm	enzyme
	SF3A3	splicing factor 3a, subunit 3, 60kDa	5.05e-07	-1.388	Nucleus	other
	ADAM28	ADAM metallopeptidase domain 28	5.5e-06	-1.389	Plasma Membrane	peptidase
	ABCF2	ATP-binding cassette, sub-family F (GCN20), member 2	1.66e-05	-1.389	Cytoplasm	transporter
	AIFM1	apoptosis-inducing factor, mitochondrion-associated, 1	4.06e-05	-1.39	Cytoplasm	enzyme
	RCSD1	RCSD domain containing 1	2.09e-06	-1.39	unknown	other
	C1orf9	chromosome 1 open reading frame 9	7.33e-06	-1.392	unknown	other
	CTSO	cathepsin O	7.39e-06	-1.393	Cytoplasm	peptidase
	GDF3	growth differentiation factor 3	3.76e-06	-1.395	Extracellular Space	growth factor
	ITPR3	inositol 1,4,5-trisphosphate receptor, type 3	7.96e-07	-1.395	Cytoplasm	ion channel
	NR1H3	nuclear receptor subfamily 1, group H, member 3	3.24e-05	-1.395	Nucleus	ligand-dependent nuclear receptor
	SSBP2	single-stranded DNA binding protein 2	4.36e-09	-1.395	Nucleus	transcription regulator
	TSPAN1	tetraspanin 1	1e-07	-1.398	unknown	other
	GNB2L1	guanine nucleotide binding protein (G protein), beta polypeptide 2-like 1	2.86e-07	-1.399	Cytoplasm	enzyme
	GOLM1	golgi membrane protein 1	3.25e-06	-1.402	Cytoplasm	other
	GCOM1	GRINL1A complex locus	0.000267	-1.402	Nucleus	other
	GNG2	guanine nucleotide binding protein (G protein), gamma 2	7.85e-07	-1.402	Plasma Membrane	enzyme
	C1orf130	chromosome 1 open reading frame 130	2.24e-05	-1.404	unknown	other
	PPP1R12A	protein phosphatase 1, regulatory (inhibitor) subunit 12A	9.53e-07	-1.404	Cytoplasm	phosphatase
	PCCA	propionyl CoA carboxylase, alpha polypeptide	6.17e-05	-1.405	Cytoplasm	enzyme
	DDC	dopa decarboxylase (aromatic L-amino acid decarboxylase)	3.07e-06	-1.407	Cytoplasm	enzyme
	MEP1B	meprin A, beta	1.17e-05	-1.411	Plasma Membrane	peptidase
	SRPR	signal recognition particle receptor (docking protein)	0.000141	-1.412	Cytoplasm	other
	PRKCH	protein kinase C, eta	3.92e-07	-1.414	Cytoplasm	kinase
	ATG4B	ATG4 autophagy related 4 homolog B (S. cerevisiae)	4.47e-07	-1.415	Cytoplasm	peptidase
	ZCCHC14	zinc finger, CCHC domain containing 14	4.97e-07	-1.416	unknown	other
	SRI	sorcin	1.44e-06	-1.418	Cytoplasm	transporter
	PPIP5K1	diphosphoinositol pentakisphosphate kinase 1	0.000287	-1.42	Nucleus	phosphatase
	MOCOS	molybdenum cofactor sulfurase	0.000498	-1.42	Cytoplasm	enzyme
	RRAGC	Ras-related GTP binding C	0.000114	-1.42	Cytoplasm	enzyme
	OBFC2A	oligonucleotide/oligosaccharide-binding fold containing 2A	4.81e-06	-1.422	Nucleus	other
	EIF5B	eukaryotic translation initiation factor 5B	3.1e-06	-1.423	Cytoplasm	translation regulator
	LASS5	LAG1 homolog, ceramide synthase 5	4.89e-05	-1.423	Cytoplasm	transcription regulator
	LIAS	lipoic acid synthetase	6.17e-05	-1.423	Cytoplasm	enzyme
	MYH9	myosin, heavy chain 9, non-muscle	0.000296	-1.424	Cytoplasm	enzyme
	ARPC3	actin related protein 2/3 complex, subunit 3, 21kDa	5.73e-07	-1.425	Cytoplasm	other
	RPS21	ribosomal protein S21	1.13e-05	-1.426	Cytoplasm	other
	UBASH3A	ubiquitin associated and SH3 domain containing A	2.96e-05	-1.426	Cytoplasm	enzyme
	BAIAP2L1	BAI1-associated protein 2-like 1	7.39e-06	-1.427	Cytoplasm	other
	CHMP7	CHMP family, member 7	2.21e-07	-1.427	Cytoplasm	transporter
	ZNF493	zinc finger protein 493	2.56e-06	-1.428	Nucleus	other
	GALNS	galactosamine (N-acetyl)-6-sulfate sulfatase	0.000173	-1.43	Cytoplasm	enzyme
	RAB3IL1	RAB3A interacting protein (rabin3)-like 1	2.72e-06	-1.431	unknown	other
	SPRED1	sprouty-related, EVH1 domain containing 1	0.000307	-1.432	Plasma Membrane	other
	TTLL5	tubulin tyrosine ligase-like family, member 5	0.000352	-1.432	Cytoplasm	enzyme
	RAB24	--	3.98e-07	-1.433	Cytoplasm	enzyme
	RPS10	ribosomal protein S10	1.45e-06	-1.433	Cytoplasm	other
	CEP76	centrosomal protein 76kDa	4.06e-06	-1.437	Cytoplasm	other
	LTV1	LTV1 homolog (S. cerevisiae)	5.77e-05	-1.437	unknown	other
	NOX1	NADPH oxidase 1	4.4e-05	-1.437	Cytoplasm	ion channel
	AGPS	alkylglycerone phosphate synthase	2.15e-05	-1.438	Cytoplasm	enzyme
	ACAD11	acyl-CoA dehydrogenase family, member 11	0.000242	-1.441	Cytoplasm	enzyme
	HSBP1	heat shock factor binding protein 1	2.84e-06	-1.442	Nucleus	transcription regulator
	SEC14L1	SEC14-like 1 (S. cerevisiae)	6.28e-06	-1.442	Cytoplasm	transporter
	ACTR2	ARP2 actin-related protein 2 homolog (yeast)	6.39e-07	-1.443	Plasma Membrane	other
	PAPOLA	poly(A) polymerase alpha	4.78e-06	-1.444	Nucleus	enzyme
	ADHFE1	alcohol dehydrogenase, iron containing, 1	2e-05	-1.445	Cytoplasm	enzyme
	PAN3	PAN3 poly(A) specific ribonuclease subunit homolog (S. cerevisiae)	8.55e-07	-1.445	Cytoplasm	other
	GAPVD1	GTPase activating protein and VPS9 domains 1	4.85e-07	-1.446	Cytoplasm	other
	CSF3R	colony stimulating factor 3 receptor (granulocyte)	2.46e-05	-1.447	Plasma Membrane	transmembrane receptor
	PLEKHG1	pleckstrin homology domain containing, family G (with RhoGef domain) member 1	0.000104	-1.447	unknown	other
	RPS17	--	6.6e-07	-1.449	Cytoplasm	other
	FAM98A	family with sequence similarity 98, member A	6.74e-07	-1.449	unknown	other
	DDX17	DEAD (Asp-Glu-Ala-Asp) box polypeptide 17	2.03e-07	-1.45	Nucleus	enzyme
	RAB5C	RAB5C, member RAS oncogene family	1.93e-05	-1.45	Cytoplasm	enzyme
	RPL19	ribosomal protein L19	4.96e-07	-1.451	Cytoplasm	other
	RPS23	ribosomal protein S23	5.91e-06	-1.452	Cytoplasm	translation regulator
	ENY2	enhancer of yellow 2 homolog (Drosophila)	3.88e-05	-1.453	Nucleus	other
	HPCAL1	hippocalcin-like 1	1.07e-05	-1.453	Cytoplasm	other
	HSPD1	heat shock 60kDa protein 1 (chaperonin)	5.57e-07	-1.455	Cytoplasm	enzyme
	NDUFA10	NADH dehydrogenase (ubiquinone) 1 alpha subcomplex, 10, 42kDa	0.000102	-1.456	Cytoplasm	enzyme
	RPL13	ribosomal protein L13	2.95e-06	-1.459	Cytoplasm	other
	YME1L1	YME1-like 1 (S. cerevisiae)	6.52e-06	-1.459	Cytoplasm	peptidase
	CTNNA1	catenin (cadherin-associated protein), alpha 1, 102kDa	1.07e-05	-1.46	Plasma Membrane	other
	LGALS3	lectin, galactoside-binding, soluble, 3	6.71e-05	-1.46	Extracellular Space	other
	MPP1	membrane protein, palmitoylated 1, 55kDa	3.61e-05	-1.46	Plasma Membrane	kinase
	RPS14	ribosomal protein S14	8.1e-06	-1.46	Cytoplasm	other
	HDAC11	histone deacetylase 11	2.33e-07	-1.461	Nucleus	transcription regulator
	OTUD1	OTU domain containing 1	2.22e-06	-1.461	unknown	other
	DDX4	DEAD (Asp-Glu-Ala-Asp) box polypeptide 4	3.16e-06	-1.462	Nucleus	enzyme
	TP53INP1	tumor protein p53 inducible nuclear protein 1	3.05e-07	-1.462	Nucleus	other
	RPS7	ribosomal protein S7	6.53e-07	-1.464	Cytoplasm	other
	LRWD1	leucine-rich repeats and WD repeat domain containing 1	0.000125	-1.465	unknown	other
	PRKAB2	protein kinase, AMP-activated, beta 2 non-catalytic subunit	4.42e-05	-1.465	Cytoplasm	kinase
	KCNAB2	potassium voltage-gated channel, shaker-related subfamily, beta member 2	0.000103	-1.466	Plasma Membrane	ion channel
	OSGIN1	oxidative stress induced growth inhibitor 1	1.06e-06	-1.468	unknown	growth factor
	CAMK2G	calcium/calmodulin-dependent protein kinase II gamma	6.56e-06	-1.469	Cytoplasm	kinase
	PCGF5	polycomb group ring finger 5	2.87e-06	-1.472	Cytoplasm	other
	SERPINB6	serpin peptidase inhibitor, clade B (ovalbumin), member 6	5.61e-06	-1.472	Cytoplasm	other
	CTNNBL1	catenin, beta like 1	0.000112	-1.474	Nucleus	other
	TTC27	tetratricopeptide repeat domain 27	3.22e-06	-1.475	unknown	other
	CASK	calcium/calmodulin-dependent serine protein kinase (MAGUK family)	2.7e-07	-1.477	Plasma Membrane	kinase
	RND3	Rho family GTPase 3	9.65e-05	-1.477	Cytoplasm	enzyme
	MYBBP1A	MYB binding protein (P160) 1a	0.000383	-1.48	Nucleus	transcription regulator
	RGL1	ral guanine nucleotide dissociation stimulator-like 1	1.22e-06	-1.481	Cytoplasm	other
	PLBD1	phospholipase B domain containing 1	8.77e-06	-1.482	Extracellular Space	other
	C1R	complement component 1, r subcomponent	5.73e-07	-1.483	Extracellular Space	peptidase
	PDIA3	protein disulfide isomerase family A, member 3	9.92e-05	-1.485	Cytoplasm	peptidase
	WDR48	WD repeat domain 48	1.01e-05	-1.486	Cytoplasm	other
	NUCB2	nucleobindin 2	0.000113	-1.49	Nucleus	other
	MTA1	metastasis associated 1	3.1e-05	-1.491	Nucleus	transcription regulator
	SEC24A	SEC24 family, member A (S. cerevisiae)	1.29e-06	-1.492	Cytoplasm	transporter
	KIAA1715	KIAA1715	0.000101	-1.495	unknown	other
	MBD5	methyl-CpG binding domain protein 5	2.19e-05	-1.497	Nucleus	other
	PCK1	phosphoenolpyruvate carboxykinase 1 (soluble)	1.03e-07	-1.498	Cytoplasm	kinase
	PRCC	papillary renal cell carcinoma (translocation-associated)	0.000223	-1.501	Nucleus	other
	NEK9	NIMA (never in mitosis gene a)- related kinase 9	3.53e-05	-1.504	Nucleus	kinase
	RALGAPA1	Ral GTPase activating protein, alpha subunit 1 (catalytic)	7.39e-06	-1.507	Cytoplasm	other
	WDFY1	WD repeat and FYVE domain containing 1	6.61e-05	-1.507	Cytoplasm	other
	AGPAT9	1-acylglycerol-3-phosphate O-acyltransferase 9	6.56e-06	-1.509	Cytoplasm	enzyme
	ACBD5	acyl-CoA binding domain containing 5	1.24e-05	-1.513	unknown	other
	ITGA1	integrin, alpha 1	0.000196	-1.513	Plasma Membrane	other
	LRRC40	leucine rich repeat containing 40	9.36e-05	-1.519	Nucleus	other
	NCOR1	nuclear receptor corepressor 1	0.000459	-1.52	Nucleus	transcription regulator
	RANBP1	RAN binding protein 1	2.73e-05	-1.52	Nucleus	other
	RPL8	--	1.18e-05	-1.526	unknown	other
	TBL3	transducin (beta)-like 3	6.79e-06	-1.526	Cytoplasm	peptidase
	QSER1	glutamine and serine rich 1	8.42e-08	-1.528	unknown	other
	FGFBP1	fibroblast growth factor binding protein 1	0.000304	-1.53	Extracellular Space	other
	CHDH	choline dehydrogenase	0.000325	-1.531	Cytoplasm	enzyme
	TCEA1	transcription elongation factor A (SII), 1	5.63e-07	-1.534	Nucleus	transcription regulator
	DDX26B	DEAD/H (Asp-Glu-Ala-Asp/His) box polypeptide 26B	6.3e-07	-1.535	unknown	other
	MAN1A2	mannosidase, alpha, class 1A, member 2	3.83e-05	-1.539	Cytoplasm	enzyme
	RPL37	ribosomal protein L37	4.74e-05	-1.543	Cytoplasm	other
	Gm5619/Gm5845	ribosomal protein L7A pseudogene	3.35e-07	-1.543	Cytoplasm	other
	SCARB1	scavenger receptor class B, member 1	2.95e-07	-1.546	Plasma Membrane	transporter
	FUNDC2	FUN14 domain containing 2	7.01e-07	-1.548	Cytoplasm	other
	MYOD1	myogenic differentiation 1	0.000134	-1.554	Nucleus	transcription regulator
	HNRNPA3	heterogeneous nuclear ribonucleoprotein A3	3.89e-05	-1.555	Nucleus	other
	RPL35A	ribosomal protein L35a	5.72e-07	-1.556	Cytoplasm	other
	OSBPL2	oxysterol binding protein-like 2	7.18e-09	-1.559	Cytoplasm	other
	RPS6	ribosomal protein S6	4.87e-07	-1.559	Cytoplasm	other
	ZNF207	zinc finger protein 207	0.000287	-1.559	Nucleus	transcription regulator
	HSPA5	heat shock 70kDa protein 5 (glucose-regulated protein, 78kDa)	0.000266	-1.56	Cytoplasm	other
	RPL6	ribosomal protein L6	2.89e-06	-1.56	Cytoplasm	other
	PTBP1	polypyrimidine tract binding protein 1	3.75e-05	-1.563	Nucleus	enzyme
	SGSM3	small G protein signaling modulator 3	7.51e-05	-1.565	Plasma Membrane	other
	JUN	jun proto-oncogene	7.92e-06	-1.566	Nucleus	transcription regulator
	WDR36	WD repeat domain 36	5.91e-07	-1.568	unknown	other
	GNPNAT1	glucosamine-phosphate N-acetyltransferase 1	1.24e-06	-1.571	Cytoplasm	enzyme
	JMJD4	jumonji domain containing 4	0.000333	-1.571	unknown	other
	FRAS1	Fraser syndrome 1	4.87e-06	-1.572	Extracellular Space	other
	RPL5	ribosomal protein L5	7.32e-07	-1.573	Cytoplasm	other
	SYNRG	synergin, gamma	3.46e-06	-1.576	Cytoplasm	other
	EIF3L	eukaryotic translation initiation factor 3, subunit L	3.25e-06	-1.579	Cytoplasm	other
	C20orf112	--	3.05e-06	-1.582	unknown	other
	C9orf64	chromosome 9 open reading frame 64	7.59e-06	-1.584	unknown	other
	Sult1d1	sulfotransferase family 1D, member 1	2.95e-07	-1.586	Cytoplasm	enzyme
	RPL3	ribosomal protein L3	8.25e-08	-1.591	Cytoplasm	other
	IRF7	interferon regulatory factor 7	1.36e-05	-1.593	Nucleus	transcription regulator
	PDLIM1	PDZ and LIM domain 1	3.08e-07	-1.595	Cytoplasm	transcription regulator
	RPS3	ribosomal protein S3	4.11e-06	-1.596	Cytoplasm	enzyme
	C3orf52	chromosome 3 open reading frame 52	0.000144	-1.597	unknown	other
	CLCC1	chloride channel CLIC-like 1	4.5e-05	-1.599	Cytoplasm	ion channel
	COPA	coatomer protein complex, subunit alpha	5.01e-06	-1.599	Cytoplasm	transporter
	NT5C1B	5'-nucleotidase, cytosolic IB	0.000115	-1.6	Cytoplasm	phosphatase
	KIF21B	kinesin family member 21B	2.34e-06	-1.604	Cytoplasm	other
	IRF2	interferon regulatory factor 2	0.000104	-1.605	Nucleus	transcription regulator
	GTF2B	general transcription factor IIB	3.95e-05	-1.606	Nucleus	transcription regulator
	ABCB10	ATP-binding cassette, sub-family B (MDR/TAP), member 10	0.000115	-1.607	Cytoplasm	transporter
	CASP8	caspase 8, apoptosis-related cysteine peptidase	0.000305	-1.607	Nucleus	peptidase
	CTSS	cathepsin S	4.5e-06	-1.607	Cytoplasm	peptidase
	ARHGAP5	Rho GTPase activating protein 5	2.95e-07	-1.618	Cytoplasm	enzyme
	ARID1A	AT rich interactive domain 1A (SWI-like)	2.33e-06	-1.63	Nucleus	transcription regulator
	PCNA	proliferating cell nuclear antigen	5.43e-06	-1.636	Nucleus	other
	ZC3H15	zinc finger CCCH-type containing 15	7.78e-07	-1.637	Nucleus	other
	YLPM1	--	5.68e-05	-1.643	Nucleus	other
	RAPGEF1	--	6.15e-05	-1.644	unknown	other
	CD47	CD47 molecule	0.000175	-1.651	Plasma Membrane	other
	EPS8L2	EPS8-like 2	4.1e-08	-1.654	unknown	other
	RAB11B	RAB11B, member RAS oncogene family	5.13e-06	-1.672	Cytoplasm	enzyme
	CSNK1E	casein kinase 1, epsilon	1.18e-05	-1.673	Cytoplasm	kinase
	ATIC	5-aminoimidazole-4-carboxamide ribonucleotide formyltransferase/IMP cyclohydrolase	9.62e-05	-1.674	Cytoplasm	enzyme
	BRWD1	bromodomain and WD repeat domain containing 1	0.000225	-1.679	Nucleus	transcription regulator
	CHKA	choline kinase alpha	0.000132	-1.68	Cytoplasm	kinase
	CHCHD2	coiled-coil-helix-coiled-coil-helix domain containing 2	3.32e-06	-1.681	Cytoplasm	other
	DNAJC3	DnaJ (Hsp40) homolog, subfamily C, member 3	5.44e-08	-1.686	Cytoplasm	other
	GNB1	guanine nucleotide binding protein (G protein), beta polypeptide 1	7.66e-08	-1.691	Plasma Membrane	enzyme
	MYD88	myeloid differentiation primary response gene (88)	3.13e-06	-1.692	Plasma Membrane	other
	WDR31	WD repeat domain 31	3.97e-05	-1.692	unknown	peptidase
	CDC123	cell division cycle 123 homolog (S. cerevisiae)	5.25e-07	-1.699	Cytoplasm	other
	ENSMUSG00000047676	--	8.1e-09	-1.7	unknown	other
	SLC35A5	solute carrier family 35, member A5	1.32e-05	-1.708	unknown	transporter
	FAM83H	family with sequence similarity 83, member H	0.000173	-1.712	unknown	other
	DKC1	dyskeratosis congenita 1, dyskerin	6.84e-07	-1.713	Nucleus	enzyme
	IFI30	interferon, gamma-inducible protein 30	6.78e-05	-1.716	Cytoplasm	enzyme
	H3F3C	H3 histone, family 3C	5.58e-06	-1.719	Nucleus	other
	SUPT5H	suppressor of Ty 5 homolog (S. cerevisiae)	2.21e-06	-1.722	Nucleus	transcription regulator
	TNRC6B	trinucleotide repeat containing 6B	0.000155	-1.722	unknown	other
	RNPEP	arginyl aminopeptidase (aminopeptidase B)	1.45e-06	-1.725	Cytoplasm	peptidase
	RASSF2	Ras association (RalGDS/AF-6) domain family member 2	0.000225	-1.725	Nucleus	other
	CPEB3	cytoplasmic polyadenylation element binding protein 3	2.1e-05	-1.741	unknown	other
	IFNAR1	interferon (alpha, beta and omega) receptor 1	2.6e-06	-1.745	Plasma Membrane	transmembrane receptor
	WDR3	WD repeat domain 3	0.000408	-1.756	Cytoplasm	other
	HMGCS2	3-hydroxy-3-methylglutaryl-CoA synthase 2 (mitochondrial)	0.000104	-1.773	Cytoplasm	enzyme
	FAS	Fas (TNF receptor superfamily, member 6)	7.66e-07	-1.778	Plasma Membrane	transmembrane receptor
	FADD	Fas (TNFRSF6)-associated via death domain	4.68e-06	-1.782	Cytoplasm	other
	GSS	glutathione synthetase	3.93e-06	-1.787	Cytoplasm	enzyme
	C1QC	complement component 1, q subcomponent, C chain	0.000218	-1.792	Extracellular Space	other
	MATR3	matrin 3	9.09e-05	-1.794	Nucleus	other
	SDF2L1	stromal cell-derived factor 2-like 1	9.99e-05	-1.799	Cytoplasm	other
	MAD2L1	MAD2 mitotic arrest deficient-like 1 (yeast)	3.65e-05	-1.8	Nucleus	other
	GFPT1	glutamine--fructose-6-phosphate transaminase 1	1.23e-07	-1.807	Cytoplasm	enzyme
	PRPF40A	PRP40 pre-mRNA processing factor 40 homolog A (S. cerevisiae)	1.59e-07	-1.808	Nucleus	other
	EIF2S1	eukaryotic translation initiation factor 2, subunit 1 alpha, 35kDa	4.1e-08	-1.809	Cytoplasm	translation regulator
	PLAA	phospholipase A2-activating protein	3.32e-08	-1.815	Cytoplasm	other
	CBLL1	Cas-Br-M (murine) ecotropic retroviral transforming sequence-like 1	4.9e-06	-1.818	Nucleus	enzyme
	SUCLG1	succinate-CoA ligase, alpha subunit	6.76e-07	-1.818	Cytoplasm	enzyme
	MON1A	MON1 homolog A (yeast)	3.05e-07	-1.827	unknown	other
	FBXL20	--	2.43e-06	-1.843	Cytoplasm	enzyme
	CD36	CD36 molecule (thrombospondin receptor)	2.03e-08	-1.845	Plasma Membrane	transmembrane receptor
	TMEM171	transmembrane protein 171	5.93e-09	-1.845	unknown	other
	CCND1	cyclin D1	6.52e-06	-1.849	Nucleus	other
	HBE1	hemoglobin, epsilon 1	5.91e-06	-1.853	Cytoplasm	transporter
	ASS1	argininosuccinate synthase 1	3.06e-07	-1.857	Cytoplasm	enzyme
	VANGL1	vang-like 1 (van gogh, Drosophila)	3.43e-08	-1.863	Cytoplasm	other
	FOXM1	forkhead box M1	7.16e-05	-1.878	Nucleus	transcription regulator
	ANXA13	annexin A13	2.39e-07	-1.888	Plasma Membrane	other
	APBB1IP	amyloid beta (A4) precursor protein-binding, family B, member 1 interacting protein	2.24e-05	-1.892	Cytoplasm	other
	ADAM9	ADAM metallopeptidase domain 9	0.000498	-1.901	Plasma Membrane	peptidase
	CD99	CD99 molecule	0.000307	-1.911	Plasma Membrane	other
	PRCP	prolylcarboxypeptidase (angiotensinase C)	8.4e-06	-1.919	Cytoplasm	peptidase
	PAICS	phosphoribosylaminoimidazole carboxylase, phosphoribosylaminoimidazole succinocarboxamide synthetase	1.52e-06	-1.925	unknown	enzyme
	SPTBN5	spectrin, beta, non-erythrocytic 5	5.56e-05	-1.931	Plasma Membrane	other
	TCP1	t-complex 1	4.82e-07	-1.943	Cytoplasm	other
	SETD1B	SET domain containing 1B	3.93e-05	-1.963	Nucleus	other
	GSN	gelsolin	7.75e-06	-1.969	Extracellular Space	other
	ARRDC3	arrestin domain containing 3	1.69e-08	-1.972	unknown	other
	TCERG1	transcription elongation regulator 1	6.3e-07	-1.974	Nucleus	transcription regulator
	ACOX1	acyl-CoA oxidase 1, palmitoyl	2.04e-06	-1.976	Cytoplasm	enzyme
	RNH1	ribonuclease/angiogenin inhibitor 1	1.38e-06	-1.98	Cytoplasm	other
	ARHGAP17	Rho GTPase activating protein 17	7.93e-06	-1.999	Cytoplasm	other
	ITPK1	inositol-tetrakisphosphate 1-kinase	6.03e-07	-2	Cytoplasm	kinase
	FGFR1OP2	FGFR1 oncogene partner 2	1.68e-06	-2.014	Cytoplasm	other
	PHLDA2	pleckstrin homology-like domain, family A, member 2	9.96e-07	-2.022	Cytoplasm	other
	ZDHHC16	zinc finger, DHHC-type containing 16	1.47e-08	-2.022	Cytoplasm	other
	COPS7A	COP9 constitutive photomorphogenic homolog subunit 7A (Arabidopsis)	4.05e-06	-2.027	Cytoplasm	other
	ANXA11	annexin A11	1.51e-08	-2.049	Nucleus	other
	ABCA3	ATP-binding cassette, sub-family A (ABC1), member 3	9.43e-05	-2.049	Plasma Membrane	transporter
	SNAPC5	small nuclear RNA activating complex, polypeptide 5, 19kDa	8.08e-07	-2.075	Nucleus	transcription regulator
	COG2	component of oligomeric golgi complex 2	2.22e-05	-2.084	Cytoplasm	transporter
	KDM2B	lysine (K)-specific demethylase 2B	1.44e-08	-2.084	Nucleus	other
	RHOB	ras homolog gene family, member B	8.18e-07	-2.096	Cytoplasm	enzyme
	MMP1 (includes EG:300339)	matrix metallopeptidase 1 (interstitial collagenase)	1.24e-07	-2.103	Extracellular Space	peptidase
	TNFRSF21	tumor necrosis factor receptor superfamily, member 21	1.59e-07	-2.105	Plasma Membrane	other
	AMD1	--	2.97e-05	-2.14	Cytoplasm	enzyme
	HNF1A	HNF1 homeobox A	1.62e-05	-2.16	Nucleus	transcription regulator
	CLDN1	claudin 1	6.05e-05	-2.161	Plasma Membrane	other
	Npm1	nucleophosmin (nucleolar phosphoprotein B23, numatrin)	1.52e-06	-2.163	Nucleus	transcription regulator
	KDM5B	lysine (K)-specific demethylase 5B	6.56e-06	-2.173	Nucleus	transcription regulator
	MVP	major vault protein	6.71e-08	-2.196	Nucleus	other
	STAT5B	signal transducer and activator of transcription 5B	8.37e-08	-2.204	Nucleus	transcription regulator
	PDCD6IP	programmed cell death 6 interacting protein	2.23e-08	-2.221	Cytoplasm	other
	PABPC1	poly(A) binding protein, cytoplasmic 1	8.65e-08	-2.235	Cytoplasm	translation regulator
	NET1	neuroepithelial cell transforming 1	6.31e-08	-2.246	Nucleus	other
	TXNDC11	thioredoxin domain containing 11	8.95e-05	-2.335	Cytoplasm	enzyme
	MIA3	melanoma inhibitory activity family, member 3	6.71e-08	-2.363	Cytoplasm	other
	SALL4	sal-like 4 (Drosophila)	3.1e-07	-2.376	Nucleus	other
	ARPC5	actin related protein 2/3 complex, subunit 5, 16kDa	1.46e-05	-2.51	Cytoplasm	other
	BTF3	basic transcription factor 3	1.48e-06	-2.517	Nucleus	transcription regulator
	CEP110	centriolin	0.000169	-2.572	Nucleus	transcription regulator
	SURF4	surfeit 4	2.14e-06	-2.577	Cytoplasm	other
	C14orf153	chromosome 14 open reading frame 153	1.11e-08	-2.605	Cytoplasm	other
	HK1	hexokinase 1	1.66e-06	-2.62	Cytoplasm	kinase
	FDXR	ferredoxin reductase	0.000413	-2.644	Cytoplasm	enzyme
	PARP4	poly (ADP-ribose) polymerase family, member 4	1.41e-06	-2.653	Nucleus	enzyme
	HDLBP	high density lipoprotein binding protein	7.78e-07	-2.76	Nucleus	transporter
	ADD3	adducin 3 (gamma)	9.87e-07	-2.817	Cytoplasm	other
	ANKRD44	ankyrin repeat domain 44	0.000305	-2.848	unknown	other
	STK4	serine/threonine kinase 4	1.07e-05	-2.993	Cytoplasm	kinase
	TGM4	transglutaminase 4 (prostate)	2.87e-08	-3.114	Extracellular Space	enzyme
	PRKAR1A	protein kinase, cAMP-dependent, regulatory, type I, alpha (tissue specific extinguisher 1)	6.34e-08	-3.151	Cytoplasm	kinase
	MMS22L	MMS22-like, DNA repair protein	2.52e-08	-3.182	unknown	other
	HNRNPH1	heterogeneous nuclear ribonucleoprotein H1 (H)	6.31e-08	-3.236	Nucleus	other
	DIAPH1	diaphanous homolog 1 (Drosophila)	3.41e-05	-3.323	Cytoplasm	other
	ACE	angiotensin I converting enzyme (peptidyl-dipeptidase A) 1	9.37e-07	-3.333	Plasma Membrane	peptidase
	SEC16B	SEC16 homolog B (S. cerevisiae)	1.24e-06	-3.392	Nucleus	other
	DHRS7	dehydrogenase/reductase (SDR family) member 7	2.21e-09	-3.595	unknown	enzyme
	LDHB	lactate dehydrogenase B	6.05e-09	-3.601	Cytoplasm	enzyme
	PLA2G2E	phospholipase A2, group IIE	0.000113	-3.717	Extracellular Space	enzyme
	DCTD	dCMP deaminase	2.33e-07	-3.816	unknown	enzyme
	SLC41A2	solute carrier family 41, member 2	8.08e-07	-3.877	unknown	transporter
	NDRG1	N-myc downstream regulated 1	3.52e-06	-4.012	Nucleus	kinase
	CDR2	cerebellar degeneration-related protein 2, 62kDa	6.17e-07	-4.565	Cytoplasm	other
	LUC7L3	LUC7-like 3 (S. cerevisiae)	3.1e-07	-4.606	Nucleus	other
	ABCB1	ATP-binding cassette, sub-family B (MDR/TAP), member 1	1.22e-05	-4.993	Plasma Membrane	transporter
	SLC43A2	solute carrier family 43, member 2	5.79e-08	-5.71	Plasma Membrane	transporter
	MYST2	MYST histone acetyltransferase 2	6.34e-08	-5.877	Nucleus	enzyme
	ARHGEF12	Rho guanine nucleotide exchange factor (GEF) 12	4.06e-08	-6.527	Cytoplasm	other
	STAT4	signal transducer and activator of transcription 4	6.31e-08	-7.692	Nucleus	transcription regulator
	ELOVL1	ELOVL fatty acid elongase 1	2.42e-09	-9.3	Cytoplasm	other
	CCDC46	centrosomal protein 112kDa	7.82e-07	-20.453	unknown	other
	ENPP7	ectonucleotide pyrophosphatase/phosphodiesterase 7	5.24e-07	-27.321	Cytoplasm	enzyme
	FABP6	fatty acid binding protein 6, ileal	2.21e-09	-41.676	Cytoplasm	transporter
E. maxima	ADIPOR1	adiponectin receptor 1	1.59e-05	1.801	Plasma Membrane	transmembrane receptor
Primary infection	ZNF207	zinc finger protein 207	0.000214	1.776	Nucleus	transcription regulator
	VIL1	villin 1	7.09e-05	1.74	Cytoplasm	other
	ADAM28	ADAM metallopeptidase domain 28	3.38e-05	1.578	Plasma Membrane	peptidase
	ILK	integrin-linked kinase	0.000213	1.504	Plasma Membrane	kinase
	PCMTD1	protein-L-isoaspartate (D-aspartate) O-methyltransferase domain containing 1	0.000177	1.499	Cytoplasm	enzyme
	PRPF4	PRP4 pre-mRNA processing factor 4 homolog (yeast)	0.000285	1.493	Nucleus	other
	EHHADH	enoyl-CoA, hydratase/3-hydroxyacyl CoA dehydrogenase	0.000409	1.458	Cytoplasm	enzyme
	B2M	beta-2-microglobulin	8.1e-05	1.362	Plasma Membrane	transmembrane receptor
	AMBRA1	autophagy/beclin-1 regulator 1	0.000339	1.356	Cytoplasm	other
	DNAJC2	DnaJ (Hsp40) homolog, subfamily C, member 2	0.000239	1.336	Nucleus	other
	PLEKHF2	pleckstrin homology domain containing, family F (with FYVE domain) member 2	0.00015	1.303	Cytoplasm	other
	COPE	coatomer protein complex, subunit epsilon	0.000317	1.298	Cytoplasm	transporter
	CLTC	clathrin, heavy chain (Hc)	0.000335	1.296	Plasma Membrane	other
	KIAA0174	KIAA0174	0.000213	1.294	unknown	other
	PECI	enoyl-CoA delta isomerase 2	0.000103	1.291	Cytoplasm	enzyme
	UQCC	ubiquinol-cytochrome c reductase complex chaperone	0.000372	1.281	Cytoplasm	other
	NRAS	neuroblastoma RAS viral (v-ras) oncogene homolog	0.000195	1.277	Plasma Membrane	enzyme
	PHC1	polyhomeotic homolog 1 (Drosophila)	0.000221	1.272	Nucleus	other
	CLTB	clathrin, light chain B	0.000375	1.253	Plasma Membrane	other
	H3F3C	H3 histone, family 3C	4.09e-07	1.248	Nucleus	other
	NFATC2	nuclear factor of activated T-cells, cytoplasmic, calcineurin-dependent 2	4.83e-06	1.246	Nucleus	transcription regulator
	PAK1	p21 protein (Cdc42/Rac)-activated kinase 1	0.000444	1.215	Cytoplasm	kinase
	DYNC1LI1	dynein, cytoplasmic 1, light intermediate chain 1	0.00039	1.214	Cytoplasm	other
	SNRPC	small nuclear ribonucleoprotein polypeptide C	6.84e-05	1.212	Nucleus	other
	IDH3B	isocitrate dehydrogenase 3 (NAD+) beta	0.00039	1.202	Cytoplasm	enzyme
	CNIH	cornichon homolog (Drosophila)	0.000375	1.166	Plasma Membrane	other
	GABPA	GA binding protein transcription factor, alpha subunit 60kDa	0.0001	1.144	Nucleus	transcription regulator
	MTF1	metal-regulatory transcription factor 1	0.00039	-1.151	Nucleus	transcription regulator
	TTF2	transcription termination factor, RNA polymerase II	4.83e-05	-1.179	Nucleus	transcription regulator
	GFOD1	glucose-fructose oxidoreductase domain containing 1	0.000432	-1.254	unknown	enzyme
	RPS12	ribosomal protein S12	0.000239	-1.266	Cytoplasm	other
	HMGXB3	HMG box domain containing 3	0.000227	-1.287	Nucleus	other
	RAB9B	RAB9B, member RAS oncogene family	0.000372	-1.305	Plasma Membrane	enzyme
	BRIX1	BRX1, biogenesis of ribosomes, homolog (S. cerevisiae)	0.000359	-1.316	Nucleus	other
	SETD1B	SET domain containing 1B	0.000329	-1.321	Nucleus	other
	CTNS	cystinosin, lysosomal cystine transporter	0.000172	-1.361	Cytoplasm	transporter
	DDC	dopa decarboxylase (aromatic L-amino acid decarboxylase)	9.07e-05	-1.367	Cytoplasm	enzyme
	KNTC1	kinetochore associated 1	0.000402	-1.378	Nucleus	other
	SSBP2	single-stranded DNA binding protein 2	0.000352	-1.404	Nucleus	transcription regulator
	RLIM	ring finger protein, LIM domain interacting	0.000156	-1.426	Nucleus	enzyme
	MR1	major histocompatibility complex, class I-related	0.000172	-1.437	Plasma Membrane	transmembrane receptor
	GGT1	gamma-glutamyltransferase 1	7.18e-05	-1.446	Cytoplasm	enzyme
	SRPR	signal recognition particle receptor (docking protein)	0.000219	-1.497	Cytoplasm	other
	MAPK11	mitogen-activated protein kinase 11	0.000208	-1.51	Cytoplasm	kinase
	CDO1	cysteine dioxygenase, type I	2.04e-05	-1.541	Cytoplasm	enzyme
	SGSM3	small G protein signaling modulator 3	8.86e-05	-1.542	unknown	other
	GTF2B	general transcription factor IIB	0.000288	-1.564	Nucleus	transcription regulator
	FTH1	ferritin, heavy polypeptide 1	0.000341	-1.604	Cytoplasm	enzyme
	LUC7L3	LUC7-like 3 (S. cerevisiae)	0.000239	-1.619	Nucleus	other
	MPST	mercaptopyruvate sulfurtransferase	3.64e-05	-1.665	Cytoplasm	enzyme
	ACOX1	acyl-CoA oxidase 1, palmitoyl	0.000221	-1.668	Cytoplasm	enzyme
	PAPSS1	3'-phosphoadenosine 5'-phosphosulfate synthase 1	2.85e-07	-1.679	Cytoplasm	enzyme
	NIPA2	non imprinted in Prader-Willi/Angelman syndrome 2	8.84e-06	-1.701	Cytoplasm	other
	AMD1	--	0.000293	-1.73	Cytoplasm	enzyme
	MGEA5	meningioma expressed antigen 5 (hyaluronidase)	0.000347	-1.772	unknown	enzyme
	HEBP1	heme binding protein 1	2.66e-05	-1.79	Cytoplasm	other
	CSNK2A2	casein kinase 2, alpha prime polypeptide	0.000458	-1.795	Cytoplasm	kinase
	FZD4	frizzled family receptor 4	0.000302	-1.802	Plasma Membrane	G-protein coupled receptor
	LETM1	leucine zipper-EF-hand containing transmembrane protein 1	9.89e-05	-1.854	Cytoplasm	other
	NARF	nuclear prelamin A recognition factor	0.00015	-1.877	Nucleus	enzyme
	COPB1	coatomer protein complex, subunit beta 1	6.19e-08	-1.894	Cytoplasm	transporter
	STAT5B	signal transducer and activator of transcription 5B	0.000342	-1.905	Nucleus	transcription regulator
	AKR1A1	aldo-keto reductase family 1, member A1 (aldehyde reductase)	1.27e-05	-1.959	Cytoplasm	enzyme
	RPLP0	ribosomal protein, large, P0, pseudogene 1	1.26e-05	-2.019	Cytoplasm	other
	DIAPH1	diaphanous homolog 1 (Drosophila)	7.85e-06	-2.062	Cytoplasm	other
	PLEKHJ1	pleckstrin homology domain containing, family J member 1	8.46e-05	-2.083	unknown	other
	SASS6	spindle assembly 6 homolog (C. elegans)	0.000213	-2.177	Cytoplasm	other
	DNAJC7	DnaJ (Hsp40) homolog, subfamily C, member 7	1.86e-05	-2.201	Cytoplasm	other
	NCOA4	nuclear receptor coactivator 4	0.000391	-2.214	Nucleus	transcription regulator
	GSTA3	glutathione S-transferase alpha 3	0.000215	-2.289	Cytoplasm	enzyme
	LRRC59	leucine rich repeat containing 59	1.86e-05	-2.436	Cytoplasm	other
	GOLM1	golgi membrane protein 1	9.07e-05	-2.457	Cytoplasm	other
	FBXW8	F-box and WD repeat domain containing 8	6.19e-08	-2.478	unknown	other
	DHRS7	dehydrogenase/reductase (SDR family) member 7	9.04e-07	-2.559	unknown	enzyme
	RFC2	replication factor C (activator 1) 2, 40kDa	3.64e-05	-2.583	Nucleus	other
	SUCLG2	succinate-CoA ligase, GDP-forming, beta subunit	1.6e-07	-2.629	Cytoplasm	enzyme
	MAK16	MAK16 homolog (S. cerevisiae)	1.6e-07	-2.634	Nucleus	other
	SPAG9	sperm associated antigen 9	0.000103	-2.635	Plasma Membrane	other
	MIA3	melanoma inhibitory activity family, member 3	2.1e-07	-2.763	Cytoplasm	other
	MOV10	Mov10, Moloney leukemia virus 10, homolog (mouse)	1.09e-08	-2.809	Nucleus	enzyme
	ENPEP	glutamyl aminopeptidase (aminopeptidase A)	1.09e-08	-2.841	Plasma Membrane	peptidase
	TP53INP1	tumor protein p53 inducible nuclear protein 1	1.09e-08	-2.979	Nucleus	other
	PET112L	PET112 homolog (yeast)	0.000317	-3.14	Cytoplasm	translation regulator
	CYP2C9	cytochrome P450, family 2, subfamily C, polypeptide 9	0.000432	-3.188	Cytoplasm	enzyme
	EIF4E	eukaryotic translation initiation factor 4E	4.37e-06	-3.222	Cytoplasm	translation regulator
	PTGR1	prostaglandin reductase 1	0.00039	-3.73	Cytoplasm	enzyme
	BPNT1	3'(2'), 5'-bisphosphate nucleotidase 1	3.95e-07	-4.108	Nucleus	phosphatase
	CA7	carbonic anhydrase VII	0.000102	-4.48	Cytoplasm	enzyme
	IL21R	interleukin 21 receptor	1.93e-08	-5.094	Plasma Membrane	transmembrane receptor
	STAT4	signal transducer and activator of transcription 4	3.61e-07	-5.439	Nucleus	transcription regulator
	IGJ	immunoglobulin J polypeptide, linker protein for immunoglobulin alpha and mu polypeptides	1.72e-05	-5.866	Extracellular Space	other
	ELOVL1	ELOVL fatty acid elongase 1	1.28e-07	-6.14	Cytoplasm	other
	ATAD1	ATPase family, AAA domain containing 1	3.95e-07	-7.767	Cytoplasm	other
E. maxima	ENPP7	ectonucleotide pyrophosphatase/phosphodiesterase 7	1.19e-07	4.21	Cytoplasm	enzyme
Secondary infection	KIAA1609	KIAA1609	5.48e-05	3.778	unknown	other
	Muc2 (rat)	mucin 2, oligomeric mucus/gel-forming	4.51e-05	3.654	Extracellular Space	other
	RPS15A	--	8.22e-06	2.717	Cytoplasm	other
	DDRGK1	DDRGK domain containing 1	5.3e-06	2.714	Extracellular Space	other
	HNRNPA2B1	heterogeneous nuclear ribonucleoprotein A2/B1	3.93e-06	2.67	Nucleus	other
	KRT20	keratin 20	5.52e-06	2.66	Cytoplasm	other
	NANP	N-acetylneuraminic acid phosphatase	8.67e-06	2.65	unknown	enzyme
	PLB1	phospholipase B1	0.00019	2.541	Cytoplasm	enzyme
	REV1	REV1 homolog (S. cerevisiae)	6.5e-06	2.509	Nucleus	enzyme
	NEDD1	neural precursor cell expressed, developmentally down-regulated 1	9.69e-09	2.456	Cytoplasm	other
	ARPC1B	actin related protein 2/3 complex, subunit 1B, 41kDa	9.41e-07	2.45	Cytoplasm	other
	HKDC1	hexokinase domain containing 1	1.13e-06	2.432	Nucleus	kinase
	VTN	vitronectin	2.92e-06	2.43	Extracellular Space	other
	PARP8	poly (ADP-ribose) polymerase family, member 8	6.35e-05	2.391	unknown	other
	RNASEH1	ribonuclease H1	0.00023	2.358	Nucleus	enzyme
	FABP6	fatty acid binding protein 6, ileal	1.43e-06	2.348	Cytoplasm	transporter
	DOPEY2	dopey family member 2	9.43e-05	2.298	Cytoplasm	other
	PICALM	phosphatidylinositol binding clathrin assembly protein	7.81e-05	2.286	Cytoplasm	other
	YLPM1	--	0.000334	2.285	Nucleus	other
	CTSZ	cathepsin Z	2.45e-06	2.285	Cytoplasm	peptidase
	RASGRP1	RAS guanyl releasing protein 1 (calcium and DAG-regulated)	3.94e-05	2.268	Cytoplasm	other
	TYRO3	TYRO3 protein tyrosine kinase	3.3e-07	2.251	Plasma Membrane	kinase
	DDX6	DEAD (Asp-Glu-Ala-Asp) box polypeptide 6	1.13e-06	2.246	Nucleus	enzyme
	PTP4A3	protein tyrosine phosphatase type IVA, member 3	1.62e-06	2.233	Plasma Membrane	phosphatase
	KARS	lysyl-tRNA synthetase	9.58e-09	2.215	Cytoplasm	enzyme
	AP2A2	adaptor-related protein complex 2, alpha 2 subunit	0.000403	2.198	Cytoplasm	transporter
	PLA2G2E	phospholipase A2, group IIE	3.86e-05	2.19	Extracellular Space	enzyme
	PTPN7	protein tyrosine phosphatase, non-receptor type 7	6.76e-09	2.179	Cytoplasm	phosphatase
	ZNF319	zinc finger protein 319	0.000293	2.166	Nucleus	other
	CDHR2	cadherin-related family member 2	1.79e-06	2.164	Plasma Membrane	other
	RAPGEF1	--	0.000139	2.163	Cytoplasm	other
	RPL10A	--	9.72e-07	2.161	Cytoplasm	other
	ANXA13	annexin A13	4.28e-06	2.144	Plasma Membrane	other
	ORAI2	ORAI calcium release-activated calcium modulator 2	3.74e-06	2.116	unknown	other
	ISOC1	isochorismatase domain containing 1	1.75e-08	2.087	Cytoplasm	enzyme
	VIPAR	VPS33B interacting protein, apical-basolateral polarity regulator	0.000346	2.083	Plasma Membrane	other
	ZFP64	zinc finger protein 64 homolog (mouse)	4.75e-06	2.082	Nucleus	other
	SLC5A9	solute carrier family 5 (sodium/glucose cotransporter), member 9	2.74e-06	2.066	Plasma Membrane	other
	FCGBP	Fc fragment of IgG binding protein	5.18e-05	2.059	Extracellular Space	other
	PIP4K2A	phosphatidylinositol-5-phosphate 4-kinase, type II, alpha	8.95e-09	2.053	Cytoplasm	kinase
	ABHD3	abhydrolase domain containing 3	5.3e-06	2.033	unknown	enzyme
	CTNNA1	catenin (cadherin-associated protein), alpha 1, 102kDa	3.15e-06	1.971	Plasma Membrane	other
	GOLIM4	golgi integral membrane protein 4	0.000158	1.944	Cytoplasm	other
	FTSJ3	FtsJ homolog 3 (E. coli)	4.62e-05	1.943	Nucleus	enzyme
	GMPPB	GDP-mannose pyrophosphorylase B	8.95e-09	1.933	Cytoplasm	enzyme
	C12orf72	methyltransferase like 20	0.000133	1.919	unknown	other
	MYST2	MYST histone acetyltransferase 2	8.14e-07	1.903	Nucleus	enzyme
	PEPD	peptidase D	0.000129	1.903	Cytoplasm	peptidase
	RAB22A	RAB22A, member RAS oncogene family	8.57e-05	1.89	Cytoplasm	enzyme
	RPN1	ribophorin I	4.75e-06	1.864	Cytoplasm	enzyme
	CD47	CD47 molecule	0.000447	1.853	Plasma Membrane	other
	CDV3	CDV3 homolog (mouse)	8.07e-05	1.852	unknown	other
	ZBTB7A	zinc finger and BTB domain containing 7A	6.63e-05	1.847	Nucleus	transcription regulator
	SLC5A11	solute carrier family 5 (sodium/glucose cotransporter), member 11	0.000184	1.819	unknown	transporter
	CLDN10	claudin 10	1.34e-05	1.815	Plasma Membrane	other
	Cr1l	complement component (3b/4b) receptor 1-like	8.68e-05	1.813	Plasma Membrane	other
	HARS	histidyl-tRNA synthetase	4.12e-05	1.811	Cytoplasm	enzyme
	TMEM216	transmembrane protein 216	0.000118	1.795	unknown	other
	MYO1D	myosin ID	0.00024	1.793	Plasma Membrane	other
	DPP4	dipeptidyl-peptidase 4	0.000414	1.792	Plasma Membrane	peptidase
	NAPEPLD	N-acyl phosphatidylethanolamine phospholipase D	0.000247	1.792	Cytoplasm	enzyme
	SLC5A1	solute carrier family 5 (sodium/glucose cotransporter), member 1	4.57e-05	1.79	Plasma Membrane	transporter
	SORD	sorbitol dehydrogenase	3.06e-06	1.77	Cytoplasm	enzyme
	FBXL5	F-box and leucine-rich repeat protein 5	2.59e-06	1.766	Cytoplasm	enzyme
	DNAJC16	DnaJ (Hsp40) homolog, subfamily C, member 16	0.000159	1.765	unknown	other
	SMNDC1	survival motor neuron domain containing 1	0.000207	1.764	Nucleus	other
	THNSL2	threonine synthase-like 2 (S. cerevisiae)	3.88e-05	1.764	unknown	other
	ERI3	ERI1 exoribonuclease family member 3	9.72e-06	1.759	Plasma Membrane	other
	OASL	2'-5'-oligoadenylate synthetase-like	4.22e-05	1.754	Cytoplasm	enzyme
	SGMS1	sphingomyelin synthase 1	3.25e-05	1.744	Cytoplasm	enzyme
	ARCN1	archain 1	0.00016	1.735	Cytoplasm	other
	MICAL1	microtubule associated monoxygenase, calponin and LIM domain containing 1	0.000429	1.731	Cytoplasm	enzyme
	GLUL	glutamate-ammonia ligase	3.37e-05	1.723	Cytoplasm	enzyme
	SCARB1	scavenger receptor class B, member 1	3.45e-05	1.723	Plasma Membrane	transporter
	SGTA	small glutamine-rich tetratricopeptide repeat (TPR)-containing, alpha	5.96e-07	1.718	Cytoplasm	other
	SF3B3	splicing factor 3b, subunit 3, 130kDa	0.000328	1.711	Nucleus	other
	BDH1	3-hydroxybutyrate dehydrogenase, type 1	0.000143	1.708	Cytoplasm	enzyme
	EIF4H	eukaryotic translation initiation factor 4H	1.84e-05	1.707	Cytoplasm	translation regulator
	FNTA	farnesyltransferase, CAAX box, alpha	1.6e-06	1.695	Cytoplasm	enzyme
	ULK1	unc-51-like kinase 1 (C. elegans)	0.000334	1.694	Cytoplasm	kinase
	CNOT8	CCR4-NOT transcription complex, subunit 8	9.87e-05	1.693	Nucleus	transcription regulator
	SPR	sepiapterin reductase (7,8-dihydrobiopterin:NADP+ oxidoreductase)	4.92e-05	1.684	Cytoplasm	enzyme
	CLNS1A	chloride channel, nucleotide-sensitive, 1A	2.52e-05	1.68	Plasma Membrane	ion channel
	PRRC1	proline-rich coiled-coil 1	9.32e-05	1.678	unknown	other
	TNFRSF1A	tumor necrosis factor receptor superfamily, member 1A	0.000214	1.678	Plasma Membrane	transmembrane receptor
	GPR183	G protein-coupled receptor 183	8.87e-06	1.673	Plasma Membrane	G-protein coupled receptor
	RER1	RER1 retention in endoplasmic reticulum 1 homolog (S. cerevisiae)	1.13e-06	1.673	Cytoplasm	other
	SLCO2A1	solute carrier organic anion transporter family, member 2A1	0.00028	1.668	Plasma Membrane	transporter
	VCPIP1	valosin containing protein (p97)/p47 complex interacting protein 1	3.93e-05	1.664	Cytoplasm	peptidase
	FGF19	fibroblast growth factor 19	0.000413	1.663	Extracellular Space	growth factor
	DNASE1L3	deoxyribonuclease I-like 3	2.51e-05	1.662	Nucleus	enzyme
	PRKACB	protein kinase, cAMP-dependent, catalytic, beta	5.53e-05	1.662	Cytoplasm	kinase
	MICALL1	MICAL-like 1	4.39e-06	1.66	Cytoplasm	other
	RPE	ribulose-5-phosphate-3-epimerase	9.85e-06	1.655	unknown	enzyme
	SLC28A2	solute carrier family 28 (sodium-coupled nucleoside transporter), member 2	0.000394	1.654	Plasma Membrane	transporter
	SPG7	spastic paraplegia 7 (pure and complicated autosomal recessive)	1.08e-07	1.647	Cytoplasm	peptidase
	KLHL9	kelch-like 9 (Drosophila)	0.000194	1.644	unknown	other
	USP22	ubiquitin specific peptidase 22	8.59e-08	1.642	Nucleus	peptidase
	ACAD11	acyl-CoA dehydrogenase family, member 11	3.12e-06	1.636	Cytoplasm	enzyme
	MOCS2	molybdenum cofactor synthesis 2	7.01e-05	1.634	Cytoplasm	enzyme
	STK10	serine/threonine kinase 10	8.82e-06	1.626	Cytoplasm	kinase
	PRPF6	PRP6 pre-mRNA processing factor 6 homolog (S. cerevisiae)	1.33e-07	1.623	Nucleus	transcription regulator
	VAPB	VAMP (vesicle-associated membrane protein)-associated protein B and C	3.16e-06	1.619	Plasma Membrane	other
	MAP3K14	mitogen-activated protein kinase kinase kinase 14	2.59e-06	1.614	Cytoplasm	kinase
	GLT1D1	glycosyltransferase 1 domain containing 1	6.61e-05	1.613	Extracellular Space	enzyme
	CD247	CD247 molecule	0.000198	1.609	Plasma Membrane	transmembrane receptor
	CD74	CD74 molecule, major histocompatibility complex, class II invariant chain	4.37e-05	1.605	Plasma Membrane	transmembrane receptor
	HSPA5	heat shock 70kDa protein 5 (glucose-regulated protein, 78kDa)	0.000279	1.593	Cytoplasm	other
	FAM114A2	family with sequence similarity 114, member A2	0.000353	1.589	unknown	other
	MBNL2	muscleblind-like 2 (Drosophila)	0.000305	1.584	unknown	other
	NR3C2	nuclear receptor subfamily 3, group C, member 2	0.000101	1.577	Nucleus	ligand-dependent nuclear receptor
	HSD11B1	hydroxysteroid (11-beta) dehydrogenase 1	2.01e-06	1.569	Cytoplasm	enzyme
	BNIP3	BCL2/adenovirus E1B 19kDa interacting protein 3	2.09e-05	1.565	Cytoplasm	other
	PCDH1	protocadherin 1	0.000139	1.563	Plasma Membrane	other
	RIN2	Ras and Rab interactor 2	3.19e-05	1.563	Cytoplasm	other
	ITPR3	inositol 1,4,5-trisphosphate receptor, type 3	4.22e-05	1.56	Cytoplasm	ion channel
	PHC1	polyhomeotic homolog 1 (Drosophila)	2.46e-06	1.56	Nucleus	other
	TBC1D9	TBC1 domain family, member 9 (with GRAM domain)	0.000109	1.56	Plasma Membrane	other
	ITPK1	inositol-tetrakisphosphate 1-kinase	1.1e-05	1.559	unknown	kinase
	LAD1	ladinin 1	1.17e-06	1.559	Extracellular Space	other
	ECD	ecdysoneless homolog (Drosophila)	4.99e-05	1.556	Nucleus	transcription regulator
	SEC61A1	Sec61 alpha 1 subunit (S. cerevisiae)	4.76e-05	1.556	Cytoplasm	transporter
	THOC2	THO complex 2	8.3e-06	1.556	Nucleus	other
	RAB11A	RAB11A, member RAS oncogene family	0.000222	1.553	Cytoplasm	enzyme
	SPATS2L	spermatogenesis associated, serine-rich 2-like	3.38e-05	1.55	unknown	other
	NRXN1	neurexin 1	3.58e-05	1.549	Plasma Membrane	transporter
	ABHD2	abhydrolase domain containing 2	3.16e-05	1.546	unknown	enzyme
	GCG	glucagon	8.95e-08	1.538	Extracellular Space	other
	C19orf22	chromosome 19 open reading frame 22	1.79e-06	1.533	unknown	other
	IPMK	inositol polyphosphate multikinase	0.000291	1.533	Nucleus	kinase
	MYO1G	myosin IG	3.56e-06	1.531	Cytoplasm	other
	SLC9A3R1	solute carrier family 9 (sodium/hydrogen exchanger), member 3 regulator 1	1.22e-05	1.531	Plasma Membrane	other
	ARHGAP19	Rho GTPase activating protein 19	2.5e-06	1.529	unknown	other
	DEF6	differentially expressed in FDCP 6 homolog (mouse)	5.18e-05	1.522	Extracellular Space	other
	SASH3	SAM and SH3 domain containing 3	4.45e-07	1.521	Cytoplasm	other
	SLC16A1	solute carrier family 16, member 1 (monocarboxylic acid transporter 1)	4.15e-05	1.515	Plasma Membrane	transporter
	SLC41A1	solute carrier family 41, member 1	0.000106	1.514	unknown	transporter
	RHOB	ras homolog gene family, member B	0.000155	1.513	Cytoplasm	enzyme
	CBX4	chromobox homolog 4	4.8e-07	1.512	Nucleus	transcription regulator
	CSNK1E	casein kinase 1, epsilon	8e-05	1.51	Cytoplasm	kinase
	PSMB1	proteasome (prosome, macropain) subunit, beta type, 1	3.06e-06	1.51	Cytoplasm	peptidase
	DISP1	dispatched homolog 1 (Drosophila)	0.000403	1.508	Plasma Membrane	transporter
	PPAPDC1B	phosphatidic acid phosphatase type 2 domain containing 1B	3.56e-06	1.508	unknown	other
	VIL1	villin 1	1.34e-05	1.501	Cytoplasm	other
	ZDHHC23	zinc finger, DHHC-type containing 23	2.36e-05	1.5	unknown	other
	FRMD4B	FERM domain containing 4B	4.15e-05	1.495	Cytoplasm	other
	CEBPG	CCAAT/enhancer binding protein (C/EBP), gamma	2.19e-05	1.494	Nucleus	transcription regulator
	EPS15L1	epidermal growth factor receptor pathway substrate 15-like 1	0.00013	1.494	Plasma Membrane	other
	SECISBP2	SECIS binding protein 2	8.22e-06	1.494	Cytoplasm	translation regulator
	OXNAD1	oxidoreductase NAD-binding domain containing 1	3.71e-05	1.493	unknown	transporter
	RBBP6	--	1.1e-06	1.491	Nucleus	other
	AQP7	aquaporin 7	0.000256	1.491	Plasma Membrane	transporter
	XPA	xeroderma pigmentosum, complementation group A	0.000403	1.488	Nucleus	other
	MLLT6	myeloid/lymphoid or mixed-lineage leukemia (trithorax homolog, Drosophila); translocated to, 6	5.07e-05	1.487	Nucleus	transcription regulator
	SMYD4	SET and MYND domain containing 4	1.1e-05	1.485	unknown	other
	FIP1L1	FIP1 like 1 (S. cerevisiae)	1.67e-05	1.484	Nucleus	other
	PLEKHA2	pleckstrin homology domain containing, family A (phosphoinositide binding specific) member 2	1.89e-06	1.483	Cytoplasm	other
	KIAA0182	KIAA0182	9.08e-05	1.482	unknown	other
	CD82	CD82 molecule	3.5e-05	1.481	Plasma Membrane	other
	EYA3	eyes absent homolog 3 (Drosophila)	0.000196	1.481	Nucleus	phosphatase
	MYOD1	myogenic differentiation 1	0.000277	1.472	Nucleus	transcription regulator
	DCAF4	DDB1 and CUL4 associated factor 4	0.000167	1.47	unknown	other
	CORO1C	coronin, actin binding protein, 1C	9.13e-05	1.469	Cytoplasm	other
	CCDC21	centrosomal protein 85kDa	4.16e-05	1.465	unknown	other
	MIOS	missing oocyte, meiosis regulator, homolog (Drosophila)	2.46e-06	1.459	unknown	other
	SNX4	sorting nexin 4	0.000271	1.459	Cytoplasm	transporter
	JKAMP	JNK1/MAPK8-associated membrane protein	0.000149	1.458	unknown	other
	ORAI1	ORAI calcium release-activated calcium modulator 1	0.000475	1.457	Plasma Membrane	ion channel
	TM4SF4	transmembrane 4 L six family member 4	2.65e-06	1.457	Plasma Membrane	other
	SOAT1	sterol O-acyltransferase 1	0.000323	1.456	Cytoplasm	enzyme
	TUBD1	tubulin, delta 1	0.00011	1.456	Nucleus	other
	AQR	aquarius homolog (mouse)	5.25e-06	1.455	Nucleus	other
	EHHADH	enoyl-CoA, hydratase/3-hydroxyacyl CoA dehydrogenase	1.16e-05	1.453	Cytoplasm	enzyme
	IDH3B	isocitrate dehydrogenase 3 (NAD+) beta	7.67e-06	1.453	Cytoplasm	enzyme
	FYTTD1	forty-two-three domain containing 1	1.06e-06	1.446	Nucleus	other
	ARHGAP10	Rho GTPase activating protein 10	0.000388	1.443	Cytoplasm	other
	CDK5RAP1	CDK5 regulatory subunit associated protein 1	1.46e-06	1.44	Extracellular Space	other
	PHLDA2	pleckstrin homology-like domain, family A, member 2	0.000326	1.439	Cytoplasm	other
	RCAN3	RCAN family member 3	9.69e-06	1.438	unknown	other
	IL12RB2	interleukin 12 receptor, beta 2	0.000187	1.436	Plasma Membrane	transmembrane receptor
	ABCG2	ATP-binding cassette, sub-family G (WHITE), member 2	4.68e-05	1.435	Plasma Membrane	transporter
	PTPN6	protein tyrosine phosphatase, non-receptor type 6	1.25e-05	1.435	Cytoplasm	phosphatase
	OSBPL6	oxysterol binding protein-like 6	0.000333	1.434	Cytoplasm	other
	PIK3R1	phosphoinositide-3-kinase, regulatory subunit 1 (alpha)	0.000149	1.431	Cytoplasm	other
	FBXO9	F-box protein 9	2.81e-05	1.425	Cytoplasm	enzyme
	LY75	lymphocyte antigen 75	6.25e-05	1.424	Plasma Membrane	other
	POC1B	POC1 centriolar protein homolog B (Chlamydomonas)	4.84e-05	1.424	unknown	other
	GATA5	GATA binding protein 5	5.62e-06	1.418	Nucleus	transcription regulator
	CHERP	calcium homeostasis endoplasmic reticulum protein	9.39e-05	1.417	Cytoplasm	other
	RPL7A	ribosomal protein L7A pseudogene	6.05e-08	1.416	Cytoplasm	other
	UFM1	ubiquitin-fold modifier 1	7.73e-05	1.416	Cytoplasm	other
	EIF5	eukaryotic translation initiation factor 5	0.000384	1.415	Cytoplasm	translation regulator
	HADHA	hydroxyacyl-CoA dehydrogenase/3-ketoacyl-CoA thiolase/enoyl-CoA hydratase (trifunctional protein), alpha subunit	0.000228	1.414	Cytoplasm	enzyme
	MPST	mercaptopyruvate sulfurtransferase	1.42e-05	1.414	Cytoplasm	enzyme
	GPRC5C	G protein-coupled receptor, family C, group 5, member C	2.31e-05	1.408	Plasma Membrane	G-protein coupled receptor
	AHCTF1	AT hook containing transcription factor 1	0.000395	1.403	Nucleus	transcription regulator
	HMGN2	high mobility group nucleosomal binding domain 2	3.25e-05	1.403	Nucleus	other
	PPP6R3	protein phosphatase 6, regulatory subunit 3	4.41e-05	1.403	unknown	other
	UBC	ubiquitin C	0.000102	1.403	Cytoplasm	other
	ARL4A	ADP-ribosylation factor-like 4A	3.28e-05	1.402	Nucleus	enzyme
	AZIN1	antizyme inhibitor 1	0.000106	1.402	Cytoplasm	enzyme
	CMIP	c-Maf-inducing protein	0.000345	1.402	Cytoplasm	other
	EIF1AY	eukaryotic translation initiation factor 1A, Y-linked	0.000115	1.399	Cytoplasm	translation regulator
	PTPN22	protein tyrosine phosphatase, non-receptor type 22 (lymphoid)	1.49e-06	1.399	Cytoplasm	phosphatase
	ANGEL2	angel homolog 2 (Drosophila)	0.000349	1.397	Nucleus	other
	SLC25A15	solute carrier family 25 (mitochondrial carrier; ornithine transporter) member 15	0.000485	1.397	Cytoplasm	transporter
	HEATR6	HEAT repeat containing 6	9.22e-05	1.395	unknown	other
	PPP2R4	protein phosphatase 2A activator, regulatory subunit 4	3.72e-05	1.395	Cytoplasm	phosphatase
	GGNBP2	gametogenetin binding protein 2	0.000315	1.393	unknown	other
	KIAA0368	KIAA0368	0.000461	1.392	Cytoplasm	other
	UBE2H	ubiquitin-conjugating enzyme E2H	3.19e-05	1.392	Cytoplasm	enzyme
	CITED4	Cbp/p300-interacting transactivator, with Glu/Asp-rich carboxy-terminal domain, 4	1.41e-05	1.39	Nucleus	transcription regulator
	FAM98A	family with sequence similarity 98, member A	0.000269	1.39	unknown	other
	LRRC8B	leucine rich repeat containing 8 family, member B	0.000401	1.39	unknown	other
	NPRL2	nitrogen permease regulator-like 2 (S. cerevisiae)	1.49e-06	1.39	unknown	other
	P2RX7	purinergic receptor P2X, ligand-gated ion channel, 7	3.71e-05	1.387	Plasma Membrane	ion channel
	AVL9	AVL9 homolog (S. cerevisiase)	0.000393	1.386	unknown	other
	B2M	beta-2-microglobulin	7.27e-06	1.386	Plasma Membrane	transmembrane receptor
	PUS1	pseudouridylate synthase 1	1.6e-06	1.384	Nucleus	enzyme
	HIPK2	homeodomain interacting protein kinase 2	1.28e-05	1.383	Nucleus	kinase
	SERINC2	serine incorporator 2	4.53e-05	1.383	Plasma Membrane	transporter
	SMPD4	sphingomyelin phosphodiesterase 4, neutral membrane (neutral sphingomyelinase-3)	0.000309	1.382	Cytoplasm	enzyme
	PSMD14	proteasome (prosome, macropain) 26S subunit, non-ATPase, 14	0.000484	1.379	Cytoplasm	peptidase
	C14orf138	methyltransferase like 21D	0.000268	1.376	unknown	other
	FOXO1	forkhead box O1	0.000243	1.375	Nucleus	transcription regulator
	CLK3	CDC-like kinase 3	0.000187	1.374	Nucleus	kinase
	SYNRG	synergin, gamma	0.000274	1.374	Cytoplasm	other
	DPYD	dihydropyrimidine dehydrogenase	3.7e-06	1.373	Cytoplasm	enzyme
	LRRC47	leucine rich repeat containing 47	0.000242	1.372	unknown	other
	COPG	coatomer protein complex, subunit gamma	0.000178	1.371	Cytoplasm	transporter
	GPS1	G protein pathway suppressor 1	1.34e-05	1.371	Nucleus	other
	ABCC1	ATP-binding cassette, sub-family C (CFTR/MRP), member 1	2.01e-05	1.37	Plasma Membrane	transporter
	ITFG3	integrin alpha FG-GAP repeat containing 3	1.81e-05	1.37	unknown	other
	NPTN	--	6.04e-06	1.369	Plasma Membrane	other
	IKZF2	IKAROS family zinc finger 2 (Helios)	6.4e-06	1.369	Nucleus	transcription regulator
	MLEC	malectin	0.000102	1.367	Plasma Membrane	other
	ARHGAP22	Rho GTPase activating protein 22	0.000317	1.365	Cytoplasm	other
	SLC29A3	solute carrier family 29 (nucleoside transporters), member 3	2.34e-06	1.36	Plasma Membrane	transporter
	SH3GL1	SH3-domain GRB2-like 1	5.14e-05	1.358	Cytoplasm	other
	RNF213	ring finger protein 213	1.46e-05	1.357	Plasma Membrane	other
	FAM48A	family with sequence similarity 48, member A	0.000263	1.355	unknown	other
	RBM26	RNA binding motif protein 26	0.000499	1.355	unknown	other
	SEC14L1	SEC14-like 1 (S. cerevisiae)	4.16e-05	1.355	Cytoplasm	transporter
	C2orf3	chromosome 2 open reading frame 3	0.00015	1.351	Nucleus	transcription regulator
	C19orf50	chromosome 19 open reading frame 50	1.94e-05	1.349	unknown	other
	DNAJC18	DnaJ (Hsp40) homolog, subfamily C, member 18	2.87e-05	1.349	unknown	enzyme
	HLA-DMA	major histocompatibility complex, class II, DM alpha	2.46e-06	1.349	Plasma Membrane	transmembrane receptor
	ABI3	ABI family, member 3	1.02e-05	1.345	Plasma Membrane	other
	DPYSL2	dihydropyrimidinase-like 2	2.73e-05	1.345	Cytoplasm	enzyme
	SAR1A	SAR1 homolog A (S. cerevisiae)	8.34e-05	1.345	Cytoplasm	enzyme
	FOXP2	forkhead box P2	1.8e-05	1.342	Nucleus	transcription regulator
	WDR61	WD repeat domain 61	1.1e-05	1.342	unknown	other
	KDM1A	lysine (K)-specific demethylase 1A	0.000187	1.341	Nucleus	enzyme
	AP2M1	adaptor-related protein complex 2, mu 1 subunit	0.000383	1.339	Cytoplasm	transporter
	PCSK7	proprotein convertase subtilisin/kexin type 7	0.000106	1.338	Cytoplasm	peptidase
	CDC42BPB	CDC42 binding protein kinase beta (DMPK-like)	0.000107	1.337	Cytoplasm	kinase
	TCEANC	transcription elongation factor A (SII) N-terminal and central domain containing	8.27e-05	1.337	unknown	other
	QRICH1	glutamine-rich 1	0.000158	1.335	unknown	other
	MYD88	myeloid differentiation primary response gene (88)	1.07e-05	1.334	Plasma Membrane	other
	ANKH	ankylosis, progressive homolog (mouse)	0.000295	1.333	Plasma Membrane	transporter
	DAP	death-associated protein	4.32e-05	1.333	Cytoplasm	other
	NEK1	NIMA (never in mitosis gene a)-related kinase 1	1.08e-05	1.332	Nucleus	kinase
	RIOK1	RIO kinase 1 (yeast)	9.13e-05	1.331	unknown	kinase
	ATP2B1	ATPase, Ca++ transporting, plasma membrane 1	0.000134	1.328	Plasma Membrane	transporter
	SLC22A23	solute carrier family 22, member 23	7.65e-05	1.328	unknown	transporter
	TRA2A	transformer 2 alpha homolog (Drosophila)	0.000344	1.328	Nucleus	other
	EMP1	epithelial membrane protein 1	0.000317	1.327	Plasma Membrane	other
	DHRS3	dehydrogenase/reductase (SDR family) member 3	0.000334	1.323	Cytoplasm	enzyme
	PIK3AP1	phosphoinositide-3-kinase adaptor protein 1	0.000116	1.321	Cytoplasm	other
	USP18	ubiquitin specific peptidase 18	6.44e-05	1.321	Cytoplasm	peptidase
	RNASEL	ribonuclease L (2',5'-oligoisoadenylate synthetase-dependent)	0.000384	1.32	Cytoplasm	enzyme
	GBF1	golgi brefeldin A resistant guanine nucleotide exchange factor 1	5.37e-06	1.318	Cytoplasm	other
	ADRB2	adrenergic, beta-2-, receptor, surface	0.000108	1.317	Plasma Membrane	G-protein coupled receptor
	C3	complement component 3	0.000232	1.315	Extracellular Space	peptidase
	ZDHHC3	zinc finger, DHHC-type containing 3	0.000301	1.314	Cytoplasm	peptidase
	ERGIC2	ERGIC and golgi 2	4.71e-05	1.313	Cytoplasm	other
	HPCAL1	hippocalcin-like 1	0.000263	1.313	Cytoplasm	other
	HIST1H1E	histone cluster 1, H1e	0.000125	1.313	Nucleus	other
	ETF1	eukaryotic translation termination factor 1	4.59e-06	1.312	Cytoplasm	translation regulator
	PTPLAD1	protein tyrosine phosphatase-like A domain containing 1	0.000107	1.311	Cytoplasm	other
	NUCB2	nucleobindin 2	0.000392	1.31	Nucleus	other
	C5orf24	chromosome 5 open reading frame 24	0.000258	1.308	unknown	other
	FMR1	fragile X mental retardation 1	7.53e-05	1.308	Nucleus	other
	CHP	calcium binding protein P22	0.000379	1.304	Cytoplasm	transporter
	ZCCHC11	zinc finger, CCHC domain containing 11	0.000231	1.303	Nucleus	enzyme
	CSNK1G1	casein kinase 1, gamma 1	0.000356	1.302	Cytoplasm	kinase
	FAM98B	family with sequence similarity 98, member B	0.00015	1.302	unknown	other
	PKM2	pyruvate kinase, muscle	0.000273	1.302	Cytoplasm	kinase
	COG4	component of oligomeric golgi complex 4	5.36e-05	1.301	Cytoplasm	transporter
	PIGT	phosphatidylinositol glycan anchor biosynthesis, class T	9.09e-05	1.301	Cytoplasm	enzyme
	TRIOBP	TRIO and F-actin binding protein	0.000483	1.3	Nucleus	other
	ACCS	1-aminocyclopropane-1-carboxylate synthase homolog (Arabidopsis)(non-functional)	0.000222	1.299	unknown	enzyme
	DAAM1	dishevelled associated activator of morphogenesis 1	0.000104	1.299	Cytoplasm	other
	ABCC2	--	5.72e-05	1.298	Plasma Membrane	transporter
	FHOD1	formin homology 2 domain containing 1	1.01e-06	1.297	Nucleus	other
	PIGG	phosphatidylinositol glycan anchor biosynthesis, class G	7.78e-05	1.296	Cytoplasm	enzyme
	RPS17	--	0.000479	1.295	Cytoplasm	other
	TBC1D9B	TBC1 domain family, member 9B (with GRAM domain)	0.000223	1.294	unknown	other
	H3F3C	H3 histone, family 3C	1.84e-05	1.293	Nucleus	other
	ADSS	adenylosuccinate synthase	6e-05	1.292	Cytoplasm	enzyme
	SFXN1	sideroflexin 1	0.000138	1.289	Cytoplasm	transporter
	GALNT6	UDP-N-acetyl-alpha-D-galactosamine:polypeptide N-acetylgalactosaminyltransferase 6 (GalNAc-T6)	6.94e-05	1.287	Cytoplasm	enzyme
	CD200R1	CD200 receptor 1	0.000464	1.285	Plasma Membrane	other
	PDE3B	phosphodiesterase 3B, cGMP-inhibited	0.000317	1.282	Cytoplasm	enzyme
	TMEM231	transmembrane protein 231	0.000476	1.282	unknown	other
	GSS	glutathione synthetase	1.41e-06	1.281	Cytoplasm	enzyme
	DNAH17	dynein, axonemal, heavy chain 17	9.13e-05	1.28	Cytoplasm	other
	BRF1 (includes EG:2972)	BRF1 homolog, subunit of RNA polymerase III transcription initiation factor IIIB (S. cerevisiae)	3.78e-07	1.279	Nucleus	transcription regulator
	LGALS3	lectin, galactoside-binding, soluble, 3	0.000418	1.277	Extracellular Space	other
	PYGL	phosphorylase, glycogen, liver	2.94e-05	1.277	unknown	enzyme
	TMEM66	transmembrane protein 66	0.000492	1.274	unknown	other
	CASP1	caspase 1, apoptosis-related cysteine peptidase (interleukin 1, beta, convertase)	0.000116	1.272	Cytoplasm	peptidase
	DNAJB4	DnaJ (Hsp40) homolog, subfamily B, member 4	2.6e-05	1.272	Nucleus	other
	NMT2	N-myristoyltransferase 2	0.000214	1.272	Cytoplasm	enzyme
	SLC37A2	solute carrier family 37 (glycerol-3-phosphate transporter), member 2	0.000459	1.272	unknown	transporter
	CDKN1B	cyclin-dependent kinase inhibitor 1B (p27, Kip1)	0.000378	1.27	Nucleus	other
	GLG1	golgi glycoprotein 1	0.000435	1.269	Cytoplasm	other
	CTSD	cathepsin D	3.36e-05	1.268	Cytoplasm	peptidase
	ACAD10	acyl-CoA dehydrogenase family, member 10	0.000495	1.267	Cytoplasm	enzyme
	SSRP1	structure specific recognition protein 1	0.000148	1.266	Nucleus	other
	TXNDC9	thioredoxin domain containing 9	0.000176	1.265	unknown	other
	MAP3K7	mitogen-activated protein kinase kinase kinase 7	1.58e-05	1.262	Cytoplasm	kinase
	TSPAN6	tetraspanin 6	2.06e-05	1.262	Plasma Membrane	other
	WHSC1L1	Wolf-Hirschhorn syndrome candidate 1-like 1	5.39e-05	1.26	Nucleus	enzyme
	OFD1	oral-facial-digital syndrome 1	4.59e-06	1.259	Plasma Membrane	other
	ZEB1	zinc finger E-box binding homeobox 1	1.92e-06	1.259	Nucleus	transcription regulator
	SPINK5	serine peptidase inhibitor, Kazal type 5	0.000341	1.257	Extracellular Space	other
	SLC31A1	solute carrier family 31 (copper transporters), member 1	0.000242	1.257	Plasma Membrane	transporter
	GNB1	guanine nucleotide binding protein (G protein), beta polypeptide 1	0.000345	1.256	Plasma Membrane	enzyme
	MFN1	mitofusin 1	0.000216	1.255	Cytoplasm	enzyme
	VANGL1	vang-like 1 (van gogh, Drosophila)	0.000485	1.254	Cytoplasm	other
	MAPK1	mitogen-activated protein kinase 1	0.000376	1.253	Cytoplasm	kinase
	DNAJC2	DnaJ (Hsp40) homolog, subfamily C, member 2	0.000113	1.251	Nucleus	other
	POLE	polymerase (DNA directed), epsilon	7.64e-05	1.251	Nucleus	enzyme
	SATB1	SATB homeobox 1	0.000363	1.246	Nucleus	transcription regulator
	USP37	ubiquitin specific peptidase 37	7.66e-05	1.245	Nucleus	peptidase
	MALL	mal, T-cell differentiation protein-like	0.000271	1.242	Plasma Membrane	other
	PPPDE1	PPPDE peptidase domain containing 1	1.03e-05	1.242	unknown	other
	ATP2C1	ATPase, Ca++ transporting, type 2C, member 1	7.73e-06	1.241	Cytoplasm	transporter
	FAM192A	family with sequence similarity 192, member A	0.000418	1.241	Nucleus	other
	SYNJ1	synaptojanin 1	0.000339	1.241	Cytoplasm	phosphatase
	FUBP1	far upstream element (FUSE) binding protein 1	0.000392	1.24	Nucleus	transcription regulator
	GOT2	glutamic-oxaloacetic transaminase 2, mitochondrial (aspartate aminotransferase 2)	1.08e-05	1.235	Cytoplasm	enzyme
	ARFGAP2	ADP-ribosylation factor GTPase activating protein 2	9.23e-05	1.231	Nucleus	other
	RPA2	replication protein A2, 32kDa	3.5e-05	1.231	Nucleus	other
	EIF5B	eukaryotic translation initiation factor 5B	2.16e-05	1.23	Cytoplasm	translation regulator
	TUBB6	tubulin, beta 6	4.89e-05	1.227	Cytoplasm	other
	IK	IK cytokine, down-regulator of HLA II	7.4e-07	1.225	Extracellular Space	cytokine
	UGGT1	UDP-glucose glycoprotein glucosyltransferase 1	0.000378	1.22	Cytoplasm	enzyme
	PGK1	phosphoglycerate kinase 1	0.000461	1.219	Cytoplasm	kinase
	COL4A3BP	collagen, type IV, alpha 3 (Goodpasture antigen) binding protein	0.000157	1.216	Cytoplasm	kinase
	KIF1B	kinesin family member 1B	0.000108	1.216	Cytoplasm	transporter
	SWAP70	SWAP switching B-cell complex 70kDa subunit	0.000158	1.216	Cytoplasm	other
	PECI	enoyl-CoA delta isomerase 2	7.7e-05	1.207	Cytoplasm	enzyme
	UQCC	ubiquinol-cytochrome c reductase complex chaperone	0.000438	1.207	Cytoplasm	other
	SIGIRR	single immunoglobulin and toll-interleukin 1 receptor (TIR) domain	0.000175	1.206	Plasma Membrane	transmembrane receptor
	SNX25	sorting nexin 25	2.97e-05	1.201	unknown	other
	HLA-DMB	major histocompatibility complex, class II, DM beta	0.000346	1.196	Plasma Membrane	transmembrane receptor
	C12orf4	chromosome 12 open reading frame 4	1.06e-05	1.195	unknown	other
	NF1	neurofibromin 1	9.27e-05	1.189	Cytoplasm	other
	YWHAG	tyrosine 3-monooxygenase/tryptophan 5-monooxygenase activation protein, gamma polypeptide	0.00042	1.186	Cytoplasm	other
	GNPNAT1	glucosamine-phosphate N-acetyltransferase 1	1.95e-05	1.184	Cytoplasm	enzyme
	WDR36	WD repeat domain 36	3.21e-05	1.184	unknown	other
	STAT5B	signal transducer and activator of transcription 5B	3.28e-05	1.18	Nucleus	transcription regulator
	RSBN1L	round spermatid basic protein 1-like	0.000214	1.179	unknown	other
	CEP76	centrosomal protein 76kDa	7.86e-05	1.176	Cytoplasm	other
	PARVG	parvin, gamma	2.1e-05	1.17	Cytoplasm	other
	CDC42	cell division cycle 42 (GTP binding protein, 25kDa)	0.000411	1.168	Cytoplasm	enzyme
	FAM114A1	family with sequence similarity 114, member A1	0.000472	1.158	unknown	other
	MYC	v-myc myelocytomatosis viral oncogene homolog (avian)	0.000118	1.155	Nucleus	transcription regulator
	PLBD1	phospholipase B domain containing 1	2.72e-05	1.154	Extracellular Space	other
	WARS	tryptophanyl-tRNA synthetase	0.000495	1.152	Cytoplasm	enzyme
	ARL16	ADP-ribosylation factor-like 16	0.000212	1.15	unknown	other
	IQGAP1	IQ motif containing GTPase activating protein 1	0.000121	1.15	Cytoplasm	other
	ADIPOR1	adiponectin receptor 1	0.000459	1.149	Plasma Membrane	transmembrane receptor
	C20orf43	chromosome 20 open reading frame 43	0.000496	1.149	unknown	other
	KLHDC2	kelch domain containing 2	2.03e-05	1.149	Cytoplasm	other
	TWF2	twinfilin, actin-binding protein, homolog 2 (Drosophila)	0.000105	1.144	Cytoplasm	kinase
	ACTR3B	ARP3 actin-related protein 3 homolog B (yeast)	1.24e-05	1.143	unknown	other
	C6orf106	chromosome 6 open reading frame 106	0.000176	1.14	unknown	other
	FAM134A	family with sequence similarity 134, member A	0.000157	1.14	unknown	other
	SFSWAP	splicing factor, suppressor of white-apricot homolog (Drosophila)	0.000157	1.136	Nucleus	other
	TASP1	taspase, threonine aspartase, 1	0.000106	1.135	Nucleus	peptidase
	ALG13	--	1.1e-05	1.134	Cytoplasm	other
	C22orf32	chromosome 22 open reading frame 32	0.000107	1.122	Extracellular Space	other
	PUS7	pseudouridylate synthase 7 homolog (S. cerevisiae)	9.66e-05	-1.102	unknown	other
	LAG3	lymphocyte-activation gene 3	0.000112	-1.111	Plasma Membrane	transmembrane receptor
	TIPARP	TCDD-inducible poly(ADP-ribose) polymerase	7.93e-05	-1.119	Nucleus	other
	SRPR	signal recognition particle receptor (docking protein)	0.000233	-1.137	Cytoplasm	other
	ATP5O	ATP synthase, H+ transporting, mitochondrial F1 complex, O subunit	8.35e-05	-1.14	Cytoplasm	transporter
	EEF2	eukaryotic translation elongation factor 2	2.49e-05	-1.153	Cytoplasm	translation regulator
	SLC9A2	solute carrier family 9 (sodium/hydrogen exchanger), member 2	0.000458	-1.155	Plasma Membrane	transporter
	UBE2D2	ubiquitin-conjugating enzyme E2D 2	6.64e-05	-1.166	Cytoplasm	enzyme
	KIAA1109	KIAA1109	3.29e-05	-1.168	unknown	other
	CCDC80	coiled-coil domain containing 80	0.000265	-1.172	Nucleus	other
	CCL5	chemokine (C-C motif) ligand 5	3.45e-05	-1.179	Extracellular Space	cytokine
	CYTIP	cytohesin 1 interacting protein	0.000306	-1.18	Cytoplasm	other
	MICALL2	MICAL-like 2	8.67e-06	-1.18	Cytoplasm	other
	CRIPT	cysteine-rich PDZ-binding protein	0.000231	-1.181	Cytoplasm	other
	NLK	nemo-like kinase	0.000451	-1.184	Nucleus	kinase
	ERCC6	excision repair cross-complementing rodent repair deficiency, complementation group 6	0.000249	-1.185	Nucleus	transcription regulator
	DRAM1	DNA-damage regulated autophagy modulator 1	0.000251	-1.186	unknown	other
	PHAX	phosphorylated adaptor for RNA export	0.000179	-1.186	Cytoplasm	other
	IDH3A	isocitrate dehydrogenase 3 (NAD+) alpha	0.000279	-1.189	Cytoplasm	enzyme
	TMEM180	transmembrane protein 180	0.000284	-1.19	unknown	other
	CRYL1	crystallin, lambda 1	2.93e-05	-1.196	Cytoplasm	other
	NR5A2	nuclear receptor subfamily 5, group A, member 2	0.00048	-1.196	Nucleus	ligand-dependent nuclear receptor
	ELOVL6	ELOVL fatty acid elongase 6	5.43e-05	-1.197	Cytoplasm	enzyme
	HCLS1	hematopoietic cell-specific Lyn substrate 1	0.000133	-1.199	Nucleus	transcription regulator
	CYP46A1	cytochrome P450, family 46, subfamily A, polypeptide 1	0.000205	-1.2	Cytoplasm	enzyme
	EIF2S1	eukaryotic translation initiation factor 2, subunit 1 alpha, 35kDa	3.84e-05	-1.2	Cytoplasm	translation regulator
	PMM2	phosphomannomutase 2	9.99e-06	-1.203	Cytoplasm	enzyme
	TPI1	triosephosphate isomerase 1	0.000326	-1.204	Cytoplasm	enzyme
	SRPK1	SRSF protein kinase 1	0.000271	-1.205	Nucleus	kinase
	RPL39	ribosomal protein L39	0.000181	-1.206	Cytoplasm	other
	ATP1B1	ATPase, Na+/K+ transporting, beta 1 polypeptide	7.79e-05	-1.207	Plasma Membrane	transporter
	PFKL	phosphofructokinase, liver	0.000414	-1.208	Cytoplasm	kinase
	USP8	ubiquitin specific peptidase 8	0.000137	-1.208	Cytoplasm	peptidase
	ST7	suppression of tumorigenicity 7	0.000222	-1.21	unknown	other
	GCNT4	glucosaminyl (N-acetyl) transferase 4, core 2	0.000448	-1.211	unknown	enzyme
	SH2D2A	SH2 domain containing 2A	7.88e-05	-1.211	Cytoplasm	other
	GFPT1	glutamine--fructose-6-phosphate transaminase 1	0.000139	-1.212	Cytoplasm	enzyme
	ATF4	activating transcription factor 4 (tax-responsive enhancer element B67)	2.99e-05	-1.216	Nucleus	transcription regulator
	RFXANK	regulatory factor X-associated ankyrin-containing protein	0.000229	-1.216	Nucleus	transcription regulator
	SDHA	succinate dehydrogenase complex, subunit A, flavoprotein (Fp)	0.00019	-1.216	Cytoplasm	enzyme
	ENOPH1	enolase-phosphatase 1	0.000149	-1.218	Cytoplasm	enzyme
	NARS	asparaginyl-tRNA synthetase	0.000202	-1.221	Cytoplasm	enzyme
	SUCLG1	succinate-CoA ligase, alpha subunit	5.18e-05	-1.222	Cytoplasm	enzyme
	SP3	Sp3 transcription factor	1.95e-05	-1.223	Nucleus	transcription regulator
	ATF1	activating transcription factor 1	0.000248	-1.226	Nucleus	transcription regulator
	ADAM33	ADAM metallopeptidase domain 33	0.000145	-1.226	Plasma Membrane	peptidase
	TAF2	TAF2 RNA polymerase II, TATA box binding protein (TBP)-associated factor, 150kDa	0.000344	-1.226	Nucleus	transcription regulator
	RPS12	ribosomal protein S12	0.000334	-1.227	Cytoplasm	other
	RPL19	ribosomal protein L19	0.000114	-1.235	Cytoplasm	other
	CHCHD2	coiled-coil-helix-coiled-coil-helix domain containing 2	2.72e-06	-1.236	Cytoplasm	other
	KLHL5	--	0.000366	-1.237	unknown	other
	CTNNB1	catenin (cadherin-associated protein), beta 1, 88kDa	0.000334	-1.238	Nucleus	transcription regulator
	COX4I1	cytochrome c oxidase subunit IV isoform 1	0.000102	-1.241	Cytoplasm	enzyme
	SLC40A1	solute carrier family 40 (iron-regulated transporter), member 1	0.000178	-1.244	Plasma Membrane	transporter
	SAP30BP	SAP30 binding protein	0.000281	-1.245	Nucleus	transcription regulator
	MMD	monocyte to macrophage differentiation-associated	0.000425	-1.251	Plasma Membrane	other
	AKAP9	A kinase (PRKA) anchor protein (yotiao) 9	0.00024	-1.253	Cytoplasm	other
	PM20D1	peptidase M20 domain containing 1	4.54e-06	-1.253	unknown	peptidase
	WBP2	WW domain binding protein 2	2.65e-05	-1.253	Cytoplasm	other
	AKR7A2	aldo-keto reductase family 7, member A2 (aflatoxin aldehyde reductase)	0.000334	-1.258	Cytoplasm	enzyme
	UQCRQ	ubiquinol-cytochrome c reductase, complex III subunit VII, 9.5kDa	0.000106	-1.259	Cytoplasm	enzyme
	RGL1	ral guanine nucleotide dissociation stimulator-like 1	0.000108	-1.263	Cytoplasm	other
	TET1	tet oncogene 1	0.00031	-1.263	Nucleus	other
	ADAM28	ADAM metallopeptidase domain 28	5.25e-05	-1.266	Plasma Membrane	peptidase
	RPS10	ribosomal protein S10	0.000196	-1.266	Cytoplasm	other
	EHD3	EH-domain containing 3	0.000111	-1.267	Cytoplasm	other
	PDK4	pyruvate dehydrogenase kinase, isozyme 4	1.46e-06	-1.267	Cytoplasm	kinase
	KDM2B	lysine (K)-specific demethylase 2B	0.00015	-1.268	Nucleus	other
	MRPL3	mitochondrial ribosomal protein L3	5.26e-06	-1.271	Cytoplasm	other
	HADHB	hydroxyacyl-CoA dehydrogenase/3-ketoacyl-CoA thiolase/enoyl-CoA hydratase (trifunctional protein), beta subunit	0.000124	-1.272	Cytoplasm	enzyme
	AOC3	amine oxidase, copper containing 3 (vascular adhesion protein 1)	9.47e-05	-1.274	Plasma Membrane	enzyme
	KPNA4	karyopherin alpha 4 (importin alpha 3)	2.36e-05	-1.275	Nucleus	transporter
	MEP1B	meprin A, beta	0.000302	-1.275	Plasma Membrane	peptidase
	ARHGAP5	Rho GTPase activating protein 5	0.000344	-1.276	Cytoplasm	enzyme
	CTSH	cathepsin H	8.46e-05	-1.278	Cytoplasm	peptidase
	KRT8	keratin 8	0.000139	-1.278	Cytoplasm	other
	EPS8L2	EPS8-like 2	4.12e-05	-1.281	unknown	other
	CASK	calcium/calmodulin-dependent serine protein kinase (MAGUK family)	2.49e-05	-1.282	Plasma Membrane	kinase
	NDUFS3	NADH dehydrogenase (ubiquinone) Fe-S protein 3, 30kDa (NADH-coenzyme Q reductase)	0.000108	-1.288	Cytoplasm	enzyme
	SGSM3	small G protein signaling modulator 3	9.99e-06	-1.288	unknown	other
	GUCY2C	guanylate cyclase 2C (heat stable enterotoxin receptor)	7.93e-05	-1.289	Plasma Membrane	kinase
	GALNT1	UDP-N-acetyl-alpha-D-galactosamine:polypeptide N-acetylgalactosaminyltransferase 1 (GalNAc-T1)	0.000139	-1.296	Cytoplasm	enzyme
	YIPF5	Yip1 domain family, member 5	2.14e-05	-1.298	unknown	other
	SDCBP	syndecan binding protein (syntenin)	0.000358	-1.299	Plasma Membrane	enzyme
	GPBP1L1	GC-rich promoter binding protein 1-like 1	0.000479	-1.3	unknown	other
	PSMA3	proteasome (prosome, macropain) subunit, alpha type, 3	0.000364	-1.3	Cytoplasm	peptidase
	MBD5	methyl-CpG binding domain protein 5	8.39e-05	-1.302	Nucleus	other
	TBRG4	transforming growth factor beta regulator 4	0.000139	-1.304	Cytoplasm	other
	UBASH3A	ubiquitin associated and SH3 domain containing A	0.000129	-1.304	Cytoplasm	enzyme
	TCEA1	transcription elongation factor A (SII), 1	8.67e-06	-1.305	Nucleus	transcription regulator
	TALDO1	transaldolase 1	0.00016	-1.306	Cytoplasm	enzyme
	HEBP1	heme binding protein 1	5.7e-05	-1.307	Cytoplasm	other
	MRPL15	mitochondrial ribosomal protein L15	0.000133	-1.31	Cytoplasm	other
	PRDX6	peroxiredoxin 6	8.07e-05	-1.31	Cytoplasm	enzyme
	DDX26B	DEAD/H (Asp-Glu-Ala-Asp/His) box polypeptide 26B	1.6e-05	-1.311	unknown	other
	USP5	ubiquitin specific peptidase 5 (isopeptidase T)	5.07e-05	-1.312	Cytoplasm	peptidase
	RPL27	ribosomal protein L27	6.62e-05	-1.313	Cytoplasm	other
	NDFIP2	Nedd4 family interacting protein 2	0.000179	-1.315	Cytoplasm	other
	RBMX	RNA binding motif protein, X-linked	0.000269	-1.318	Nucleus	other
	STX2	syntaxin 2	7.24e-05	-1.323	Cytoplasm	transporter
	ETFA	electron-transfer-flavoprotein, alpha polypeptide	0.00033	-1.327	Cytoplasm	transporter
	DNMBP	dynamin binding protein	3.53e-05	-1.333	Cytoplasm	other
	RLIM	ring finger protein, LIM domain interacting	2.96e-05	-1.334	Nucleus	enzyme
	DDC	dopa decarboxylase (aromatic L-amino acid decarboxylase)	4.68e-05	-1.336	Cytoplasm	enzyme
	XYLB	xylulokinase homolog (H. influenzae)	8.38e-06	-1.337	unknown	kinase
	PDLIM5	PDZ and LIM domain 5	9.18e-05	-1.339	Cytoplasm	other
	GOLGB1	golgin B1	7.66e-05	-1.34	Cytoplasm	other
	TTF2	transcription termination factor, RNA polymerase II	0.000326	-1.34	Nucleus	transcription regulator
	RQCD1	RCD1 required for cell differentiation1 homolog (S. pombe)	0.000418	-1.343	unknown	other
	CBR1	carbonyl reductase 1	5.3e-05	-1.344	Cytoplasm	enzyme
	RAN	RAN, member RAS oncogene family	4.28e-05	-1.344	Nucleus	enzyme
	C11orf54	chromosome 11 open reading frame 54	1.03e-05	-1.345	Nucleus	other
	TOMM34	translocase of outer mitochondrial membrane 34	0.000235	-1.345	Cytoplasm	other
	HNRNPH1	heterogeneous nuclear ribonucleoprotein H1 (H)	2.16e-05	-1.346	Nucleus	other
	IRAK2	interleukin-1 receptor-associated kinase 2	0.000364	-1.346	Plasma Membrane	kinase
	SDF4	stromal cell derived factor 4	0.000116	-1.346	Cytoplasm	other
	TDP2	tyrosyl-DNA phosphodiesterase 2	0.000136	-1.349	Cytoplasm	transcription regulator
	TRIO	triple functional domain (PTPRF interacting)	0.000299	-1.351	Plasma Membrane	kinase
	C3AR1	complement component 3a receptor 1	0.000163	-1.353	Plasma Membrane	G-protein coupled receptor
	UQCRFS1	ubiquinol-cytochrome c reductase, Rieske iron-sulfur polypeptide 1	0.000112	-1.353	Cytoplasm	enzyme
	RPL3	ribosomal protein L3	1.49e-05	-1.359	Cytoplasm	other
	DHX35	DEAH (Asp-Glu-Ala-His) box polypeptide 35	1.12e-06	-1.361	unknown	enzyme
	EIF3L	eukaryotic translation initiation factor 3, subunit L	4.99e-05	-1.361	Cytoplasm	other
	TTC17	tetratricopeptide repeat domain 17	0.000232	-1.364	unknown	other
	C6orf192	chromosome 6 open reading frame 192	0.000229	-1.365	unknown	other
	CD36	CD36 molecule (thrombospondin receptor)	7.96e-05	-1.368	Plasma Membrane	transmembrane receptor
	MVP	major vault protein	0.000242	-1.368	Nucleus	other
	SKIV2L2	superkiller viralicidic activity 2-like 2 (S. cerevisiae)	9.18e-05	-1.369	Nucleus	other
	BRIX1	BRX1, biogenesis of ribosomes, homolog (S. cerevisiae)	4.93e-06	-1.37	Nucleus	other
	MARVELD2	MARVEL domain containing 2	0.00018	-1.37	unknown	other
	NCOR1	nuclear receptor corepressor 1	5.43e-05	-1.372	Nucleus	transcription regulator
	MAPK11	mitogen-activated protein kinase 11	0.000166	-1.373	Cytoplasm	kinase
	RPS6	ribosomal protein S6	2.45e-06	-1.377	Cytoplasm	other
	NAA50	N(alpha)-acetyltransferase 50, NatE catalytic subunit	1.6e-05	-1.378	Cytoplasm	enzyme
	SLC4A7	solute carrier family 4, sodium bicarbonate cotransporter, member 7	0.000113	-1.378	Plasma Membrane	transporter
	AQP11	aquaporin 11	0.000112	-1.381	unknown	transporter
	FLCN	folliculin	0.000302	-1.381	Cytoplasm	other
	CD44	CD44 molecule (Indian blood group)	0.000163	-1.383	Plasma Membrane	other
	NOS2	nitric oxide synthase 2, inducible	2.14e-05	-1.383	Cytoplasm	enzyme
	CPA1	carboxypeptidase A1 (pancreatic)	0.000131	-1.385	Extracellular Space	peptidase
	XPO1	exportin 1 (CRM1 homolog, yeast)	0.000115	-1.386	Nucleus	transporter
	PABPC1	poly(A) binding protein, cytoplasmic 1	7.93e-05	-1.387	Cytoplasm	translation regulator
	TCEB3	transcription elongation factor B (SIII), polypeptide 3 (110kDa, elongin A)	7.87e-05	-1.392	Nucleus	transcription regulator
	IFNAR1	interferon (alpha, beta and omega) receptor 1	0.000353	-1.396	Plasma Membrane	transmembrane receptor
	TXNDC5	thioredoxin domain containing 5 (endoplasmic reticulum)	8.89e-05	-1.4	Cytoplasm	enzyme
	XPR1	xenotropic and polytropic retrovirus receptor 1	1.46e-05	-1.401	Plasma Membrane	G-protein coupled receptor
	ERGIC3	ERGIC and golgi 3	6.08e-05	-1.403	Cytoplasm	other
	RPL5	ribosomal protein L5	7.34e-05	-1.403	Cytoplasm	other
	DBR1	debranching enzyme homolog 1 (S. cerevisiae)	4.1e-06	-1.404	Nucleus	enzyme
	BPI	bactericidal/permeability-increasing protein	0.000484	-1.405	Plasma Membrane	transporter
	C1orf69	IBA57, iron-sulfur cluster assembly homolog (S. cerevisiae)	0.000403	-1.405	Cytoplasm	other
	BBOX1	butyrobetaine (gamma), 2-oxoglutarate dioxygenase (gamma-butyrobetaine hydroxylase) 1	0.000476	-1.406	Cytoplasm	enzyme
	CYTH4	cytohesin 4	2.51e-05	-1.406	Cytoplasm	other
	TMEM189-UBE2V1	TMEM189-UBE2V1 readthrough	0.000149	-1.406	Cytoplasm	other
	OSBPL2	oxysterol binding protein-like 2	2.96e-05	-1.409	Cytoplasm	other
	LPAR6	lysophosphatidic acid receptor 6	9.18e-05	-1.411	Plasma Membrane	G-protein coupled receptor
	FBXL20	--	3.4e-05	-1.412	Cytoplasm	enzyme
	CELSR3	cadherin, EGF LAG seven-pass G-type receptor 3 (flamingo homolog, Drosophila)	0.00034	-1.414	Plasma Membrane	G-protein coupled receptor
	GHITM	growth hormone inducible transmembrane protein	0.000177	-1.416	Cytoplasm	other
	WDR77	WD repeat domain 77	5.62e-06	-1.419	Nucleus	other
	CBWD2	COBW domain containing 2	0.000291	-1.421	unknown	other
	HEATR1	HEAT repeat containing 1	4.58e-05	-1.421	Nucleus	other
	ENY2	enhancer of yellow 2 homolog (Drosophila)	0.000134	-1.422	Nucleus	other
	NANS	N-acetylneuraminic acid synthase	0.000112	-1.423	Cytoplasm	enzyme
	NDUFA9	NADH dehydrogenase (ubiquinone) 1 alpha subcomplex, 9, 39kDa	5.39e-05	-1.423	Cytoplasm	enzyme
	ISX	intestine-specific homeobox	1.22e-05	-1.424	unknown	other
	DCAF13	DDB1 and CUL4 associated factor 13	0.000401	-1.428	Nucleus	other
	SDR16C5	short chain dehydrogenase/reductase family 16C, member 5	4.42e-05	-1.429	Cytoplasm	enzyme
	CYB5A	cytochrome b5 type A (microsomal)	0.000319	-1.43	Cytoplasm	enzyme
	NIPA2	non imprinted in Prader-Willi/Angelman syndrome 2	1.6e-06	-1.432	Cytoplasm	other
	SLC39A11	solute carrier family 39 (metal ion transporter), member 11	0.000214	-1.432	unknown	transporter
	COPA	coatomer protein complex, subunit alpha	0.000114	-1.443	Cytoplasm	transporter
	RPIA	ribose 5-phosphate isomerase A	0.000122	-1.448	Cytoplasm	enzyme
	DECR1	2,4-dienoyl CoA reductase 1, mitochondrial	3.18e-05	-1.45	Cytoplasm	enzyme
	PSMD1	proteasome (prosome, macropain) 26S subunit, non-ATPase, 1	1.04e-06	-1.459	Cytoplasm	other
	Npm1	nucleophosmin (nucleolar phosphoprotein B23, numatrin)	7.96e-05	-1.46	Nucleus	transcription regulator
	RNF34	ring finger protein 34	6.61e-05	-1.46	Cytoplasm	enzyme
	TSTA3	tissue specific transplantation antigen P35B	1.51e-05	-1.46	Plasma Membrane	enzyme
	WWOX	WW domain containing oxidoreductase	1.32e-06	-1.462	Cytoplasm	enzyme
	ZNFX1	zinc finger, NFX1-type containing 1	0.000125	-1.462	Nucleus	transcription regulator
	RAP1B	RAP1B, member of RAS oncogene family	0.000116	-1.467	Cytoplasm	enzyme
	C6orf72	chromosome 6 open reading frame 72	0.000131	-1.471	unknown	other
	PDK3	pyruvate dehydrogenase kinase, isozyme 3	1.76e-06	-1.473	Cytoplasm	kinase
	SUB1	SUB1 homolog (S. cerevisiae)	6.22e-05	-1.474	Nucleus	transcription regulator
	PCNA	proliferating cell nuclear antigen	0.000434	-1.482	Nucleus	other
	CAPZA2	capping protein (actin filament) muscle Z-line, alpha 2	3.45e-06	-1.483	Cytoplasm	other
	ENPP6	ectonucleotide pyrophosphatase/phosphodiesterase 6	0.000209	-1.486	Cytoplasm	enzyme
	FUNDC2	FUN14 domain containing 2	4.76e-05	-1.486	Cytoplasm	other
	CENPL	centromere protein L	7.37e-06	-1.49	unknown	other
	ERAP1	endoplasmic reticulum aminopeptidase 1	8.22e-08	-1.49	Extracellular Space	peptidase
	MCC	mutated in colorectal cancers	0.000122	-1.492	Cytoplasm	other
	MR1	major histocompatibility complex, class I-related	7.51e-09	-1.493	Plasma Membrane	transmembrane receptor
	PHB	prohibitin	0.000161	-1.493	Nucleus	transcription regulator
	ACOT13	acyl-CoA thioesterase 13	5.68e-05	-1.494	Cytoplasm	enzyme
	CLCC1	chloride channel CLIC-like 1	0.000106	-1.495	Cytoplasm	ion channel
	GPD1	glycerol-3-phosphate dehydrogenase 1 (soluble)	4.09e-06	-1.5	Cytoplasm	enzyme
	SLC16A10	solute carrier family 16, member 10 (aromatic amino acid transporter)	5.55e-05	-1.505	Plasma Membrane	transporter
	SLC2A5	solute carrier family 2 (facilitated glucose/fructose transporter), member 5	6.5e-06	-1.505	Plasma Membrane	transporter
	SECISBP2L	SECIS binding protein 2-like	0.000112	-1.507	unknown	other
	HSPD1	heat shock 60kDa protein 1 (chaperonin)	3.39e-07	-1.525	Cytoplasm	enzyme
	PYGB	phosphorylase, glycogen; brain	6.15e-05	-1.526	Cytoplasm	enzyme
	ACAA2	acetyl-CoA acyltransferase 2	2.98e-05	-1.527	Cytoplasm	enzyme
	CCND1	cyclin D1	4.68e-05	-1.528	Nucleus	other
	PIK3C2B	phosphoinositide-3-kinase, class 2, beta polypeptide	1.42e-05	-1.531	Cytoplasm	kinase
	SREBF2	sterol regulatory element binding transcription factor 2	2.19e-05	-1.531	Nucleus	transcription regulator
	ACO1	aconitase 1, soluble	1.84e-06	-1.533	Cytoplasm	enzyme
	IRF2	interferon regulatory factor 2	1.48e-05	-1.534	Nucleus	transcription regulator
	SSH1	slingshot homolog 1 (Drosophila)	4.76e-05	-1.537	Cytoplasm	phosphatase
	KIAA1715	KIAA1715	0.000213	-1.544	unknown	other
	CD69	CD69 molecule	0.000184	-1.546	Plasma Membrane	transmembrane receptor
	SURF1	surfeit 1	1.42e-05	-1.546	Cytoplasm	enzyme
	JMJD4	jumonji domain containing 4	5.74e-06	-1.548	unknown	other
	PGD	phosphogluconate dehydrogenase	7.07e-05	-1.552	Cytoplasm	enzyme
	SLMAP	sarcolemma associated protein	5.32e-05	-1.554	Plasma Membrane	other
	ITGA1	integrin, alpha 1	0.000102	-1.558	Plasma Membrane	other
	CD83	CD83 molecule	0.000468	-1.559	Plasma Membrane	other
	GGT1	gamma-glutamyltransferase 1	2.05e-05	-1.559	Cytoplasm	enzyme
	ASS1	argininosuccinate synthase 1	5.78e-05	-1.568	Cytoplasm	enzyme
	RANBP1	RAN binding protein 1	2.47e-05	-1.577	Nucleus	other
	TMEM184C	transmembrane protein 184C	6.56e-06	-1.586	unknown	other
	TYMS	thymidylate synthetase	4.42e-05	-1.588	Nucleus	enzyme
	CECR1	cat eye syndrome chromosome region, candidate 1	0.000126	-1.589	Extracellular Space	enzyme
	KNTC1	kinetochore associated 1	4.16e-05	-1.589	Nucleus	other
	C1QBP	complement component 1, q subcomponent binding protein	2.78e-05	-1.593	Cytoplasm	other
	PCCA	propionyl CoA carboxylase, alpha polypeptide	2.46e-06	-1.595	Cytoplasm	enzyme
	SQRDL	sulfide quinone reductase-like (yeast)	7.91e-05	-1.595	Cytoplasm	enzyme
	NADK	NAD kinase	8.45e-05	-1.596	Cytoplasm	kinase
	PLAC8	placenta-specific 8	5.43e-05	-1.6	Nucleus	other
	STARD5	StAR-related lipid transfer (START) domain containing 5	2.47e-05	-1.6	Cytoplasm	transporter
	DKC1	dyskeratosis congenita 1, dyskerin	4.1e-06	-1.603	Nucleus	enzyme
	ALDH2	aldehyde dehydrogenase 2 family (mitochondrial)	5.72e-05	-1.609	Cytoplasm	enzyme
	CTNS	cystinosin, lysosomal cystine transporter	2.62e-06	-1.609	Cytoplasm	transporter
	MMS22L	MMS22-like, DNA repair protein	1.02e-05	-1.61	unknown	other
	RBP2	retinol binding protein 2, cellular	5.07e-05	-1.613	Cytoplasm	transporter
	ANXA6	annexin A6	0.000216	-1.619	Plasma Membrane	other
	C16orf5	chromosome 16 open reading frame 5	0.000112	-1.634	Nucleus	other
	MAD2L1	MAD2 mitotic arrest deficient-like 1 (yeast)	0.000259	-1.635	Nucleus	other
	MGST3	microsomal glutathione S-transferase 3	3.43e-05	-1.637	Cytoplasm	enzyme
	TTC38	tetratricopeptide repeat domain 38	1.23e-05	-1.637	unknown	other
	VAT1	vesicle amine transport protein 1 homolog (T. californica)	5.16e-06	-1.642	Plasma Membrane	transporter
	ERLIN2	ER lipid raft associated 2	1.43e-05	-1.648	Plasma Membrane	other
	AHCY	adenosylhomocysteinase	1.29e-06	-1.653	Cytoplasm	enzyme
	GTF2B	general transcription factor IIB	1.97e-07	-1.654	Nucleus	transcription regulator
	BTF3	basic transcription factor 3	1.51e-05	-1.655	Nucleus	transcription regulator
	LOC81691	exonuclease NEF-sp	9.18e-05	-1.656	Nucleus	enzyme
	ABCA1	ATP-binding cassette, sub-family A (ABC1), member 1	3.95e-07	-1.658	Plasma Membrane	transporter
	CD8B	CD8b molecule	1.06e-05	-1.66	Plasma Membrane	other
	STAM2	signal transducing adaptor molecule (SH3 domain and ITAM motif) 2	0.000408	-1.666	Cytoplasm	other
	PAPSS1	3'-phosphoadenosine 5'-phosphosulfate synthase 1	0.000191	-1.667	Cytoplasm	enzyme
	AP1G1	adaptor-related protein complex 1, gamma 1 subunit	2.19e-05	-1.668	Cytoplasm	transporter
	DCAF12	DDB1 and CUL4 associated factor 12	4.54e-06	-1.677	unknown	other
	GZMA	granzyme A (granzyme 1, cytotoxic T-lymphocyte-associated serine esterase 3)	0.000115	-1.681	Cytoplasm	peptidase
	WDR31	WD repeat domain 31	0.000157	-1.682	unknown	peptidase
	BLMH	bleomycin hydrolase	2.14e-05	-1.685	Cytoplasm	peptidase
	CD81	CD81 molecule	6.5e-05	-1.685	Plasma Membrane	other
	ADH5	alcohol dehydrogenase 5 (class III), chi polypeptide	2.17e-05	-1.689	Cytoplasm	enzyme
	GSTT1	glutathione S-transferase theta 1	2.43e-06	-1.691	Cytoplasm	enzyme
	NDRG1	N-myc downstream regulated 1	2.81e-05	-1.691	Nucleus	kinase
	MDH2	malate dehydrogenase 2, NAD (mitochondrial)	2.47e-07	-1.692	Cytoplasm	enzyme
	YARS	tyrosyl-tRNA synthetase	2.87e-05	-1.7	Cytoplasm	enzyme
	NARF	nuclear prelamin A recognition factor	0.000106	-1.703	Nucleus	enzyme
	DUS2L	dihydrouridine synthase 2-like, SMM1 homolog (S. cerevisiae)	4.99e-05	-1.704	Cytoplasm	other
	Sult1d1	sulfotransferase family 1D, member 1	0.000123	-1.704	Cytoplasm	enzyme
	KRTCAP3	keratinocyte associated protein 3	7.65e-05	-1.718	unknown	other
	ACOX1	acyl-CoA oxidase 1, palmitoyl	1.65e-05	-1.72	Cytoplasm	enzyme
	SUV420H1	suppressor of variegation 4-20 homolog 1 (Drosophila)	8.76e-05	-1.724	Nucleus	enzyme
	GCC1	GRIP and coiled-coil domain containing 1	2.51e-05	-1.737	Cytoplasm	other
	WHSC2	Wolf-Hirschhorn syndrome candidate 2	4.32e-05	-1.741	Nucleus	other
	GRAMD3	GRAM domain containing 3	3.58e-05	-1.758	unknown	other
	TES	testis derived transcript (3 LIM domains)	1.56e-07	-1.764	Plasma Membrane	other
	DROSHA	drosha, ribonuclease type III	9.85e-06	-1.772	Nucleus	enzyme
	RABGGTB	Rab geranylgeranyltransferase, beta subunit	1.29e-06	-1.772	Cytoplasm	enzyme
	USP24	ubiquitin specific peptidase 24	1.41e-05	-1.779	unknown	peptidase
	PRCC	papillary renal cell carcinoma (translocation-associated)	6.49e-05	-1.796	Nucleus	other
	PRDX1	peroxiredoxin 1	4.64e-07	-1.81	Cytoplasm	enzyme
	KDM5B	lysine (K)-specific demethylase 5B	4.05e-05	-1.814	Nucleus	transcription regulator
	CCDC88C	coiled-coil domain containing 88C	2.01e-05	-1.816	unknown	other
	AKR1B1	aldo-keto reductase family 1, member B1 (aldose reductase)	8.38e-08	-1.853	Cytoplasm	enzyme
	LRRC59	leucine rich repeat containing 59	1.97e-07	-1.856	Cytoplasm	other
	MATR3	matrin 3	7.86e-05	-1.857	Nucleus	other
	ARRDC3	arrestin domain containing 3	8.82e-06	-1.866	unknown	other
	C10orf118	chromosome 10 open reading frame 118	0.000299	-1.869	unknown	other
	CSNK2A2	casein kinase 2, alpha prime polypeptide	2.51e-07	-1.881	Cytoplasm	kinase
	MYH10	myosin, heavy chain 10, non-muscle	1.4e-05	-1.881	Cytoplasm	other
	PAICS	phosphoribosylaminoimidazole carboxylase, phosphoribosylaminoimidazole succinocarboxamide synthetase	5.07e-05	-1.882	unknown	enzyme
	CDO1	cysteine dioxygenase, type I	1.81e-06	-1.887	Cytoplasm	enzyme
	CHMP1A	chromatin modifying protein 1A	7.34e-08	-1.891	Extracellular Space	peptidase
	PLAU	plasminogen activator, urokinase	3.56e-06	-1.892	Extracellular Space	peptidase
	CEP170	centrosomal protein 170kDa	8.76e-05	-1.896	Nucleus	other
	PLEKHJ1	pleckstrin homology domain containing, family J member 1	4e-08	-1.897	unknown	other
	DNAJC7	DnaJ (Hsp40) homolog, subfamily C, member 7	8.59e-08	-1.9	Cytoplasm	other
	FBXW8	F-box and WD repeat domain containing 8	6.71e-09	-1.905	unknown	other
	APBB1IP	amyloid beta (A4) precursor protein-binding, family B, member 1 interacting protein	0.000114	-1.912	Cytoplasm	other
	FAM35A	family with sequence similarity 35, member A	3.63e-05	-1.915	unknown	other
	MGEA5	meningioma expressed antigen 5 (hyaluronidase)	2.46e-06	-1.919	unknown	enzyme
	AMD1	--	2.18e-08	-1.922	Cytoplasm	enzyme
	CTSO	cathepsin O	0.000185	-1.935	Cytoplasm	peptidase
	SVIL	supervillin	1.23e-05	-1.939	Plasma Membrane	other
	WDR3	WD repeat domain 3	5.46e-05	-1.961	Cytoplasm	other
	IGF2R	insulin-like growth factor 2 receptor	1.74e-06	-1.962	Plasma Membrane	transmembrane receptor
	IGJ	immunoglobulin J polypeptide, linker protein for immunoglobulin alpha and mu polypeptides	2.34e-05	-1.976	Extracellular Space	other
	FAM117B	family with sequence similarity 117, member B	1.9e-06	-1.989	unknown	other
	FTH1	ferritin, heavy polypeptide 1	4.75e-06	-1.989	Cytoplasm	enzyme
	NCOA4	nuclear receptor coactivator 4	1.78e-07	-1.992	Nucleus	transcription regulator
	COPB1	coatomer protein complex, subunit beta 1	1.06e-06	-1.996	Cytoplasm	transporter
	NDE1	nudE nuclear distribution gene E homolog 1 (A. nidulans)	1.83e-06	-2.007	Nucleus	other
	MGST1	microsomal glutathione S-transferase 1	6.59e-07	-2.012	Cytoplasm	enzyme
	MOV10	Mov10, Moloney leukemia virus 10, homolog (mouse)	2.05e-09	-2.014	Nucleus	enzyme
	DPP8	dipeptidyl-peptidase 8	1.74e-06	-2.017	Cytoplasm	peptidase
	MTERFD3	MTERF domain containing 3	4.97e-08	-2.021	Cytoplasm	other
	PDCD6IP	programmed cell death 6 interacting protein	1.08e-06	-2.051	Cytoplasm	other
	C1R	complement component 1, r subcomponent	4.51e-05	-2.059	Extracellular Space	peptidase
	ANXA5	annexin A5	4.22e-05	-2.069	Plasma Membrane	other
	DDX27	DEAD (Asp-Glu-Ala-Asp) box polypeptide 27	4.22e-07	-2.079	Nucleus	enzyme
	GOLM1	golgi membrane protein 1	1.03e-06	-2.08	Cytoplasm	other
	LRRFIP2	--	1.25e-06	-2.101	unknown	other
	C1QC	complement component 1, q subcomponent, C chain	0.000398	-2.102	Extracellular Space	other
	SALL4	sal-like 4 (Drosophila)	0.000268	-2.103	Nucleus	other
	SEPT5	septin 5	6.88e-08	-2.134	Cytoplasm	enzyme
	AKR1A1	aldo-keto reductase family 1, member A1 (aldehyde reductase)	1.09e-06	-2.141	Cytoplasm	enzyme
	WDFY3	WD repeat and FYVE domain containing 3	7.51e-09	-2.143	Cytoplasm	enzyme
	RPLP0	ribosomal protein, large, P0, pseudogene 1	4.63e-06	-2.145	Cytoplasm	other
	ENPEP	glutamyl aminopeptidase (aminopeptidase A)	2.26e-09	-2.171	Plasma Membrane	peptidase
	EPB41L3	erythrocyte membrane protein band 4.1-like 3	7.26e-07	-2.184	Plasma Membrane	other
	ADD3	adducin 3 (gamma)	6.85e-06	-2.197	Cytoplasm	other
	TP53INP1	tumor protein p53 inducible nuclear protein 1	1.14e-08	-2.203	Nucleus	other
	DCTD	dCMP deaminase	5.62e-06	-2.205	unknown	enzyme
	IL2RG	interleukin 2 receptor, gamma	6.47e-08	-2.23	Plasma Membrane	transmembrane receptor
	SUCLG2	succinate-CoA ligase, GDP-forming, beta subunit	7.51e-09	-2.23	Cytoplasm	enzyme
	ENSMUSG00000047676	--	7.34e-08	-2.261	unknown	other
	KIAA0247	KIAA0247	3.39e-07	-2.261	unknown	other
	HK1	hexokinase 1	1.51e-05	-2.263	Cytoplasm	kinase
	RFC2	replication factor C (activator 1) 2, 40kDa	1.81e-05	-2.276	Nucleus	other
	LETM1	leucine zipper-EF-hand containing transmembrane protein 1	9.25e-06	-2.297	Cytoplasm	other
	ADK	adenosine kinase	3e-07	-2.302	Nucleus	kinase
	PDIA5	protein disulfide isomerase family A, member 5	3.84e-09	-2.315	Cytoplasm	enzyme
	ANKRD44	ankyrin repeat domain 44	1.89e-06	-2.325	unknown	other
	GRK4	G protein-coupled receptor kinase 4	2.82e-07	-2.335	Plasma Membrane	kinase
	PET112L	PET112 homolog (yeast)	1.76e-06	-2.343	Cytoplasm	translation regulator
	MAPRE1	microtubule-associated protein, RP/EB family, member 1	1.14e-08	-2.354	Cytoplasm	other
	IL8	interleukin 8	0.000398	-2.365	Extracellular Space	cytokine
	AMY2A	amylase, alpha 2A (pancreatic)	0.000198	-2.37	Extracellular Space	enzyme
	CYP2C9	cytochrome P450, family 2, subfamily C, polypeptide 9	3.71e-05	-2.389	Cytoplasm	enzyme
	GSTA3	glutathione S-transferase alpha 3	2.69e-05	-2.393	Cytoplasm	enzyme
	MAK16	MAK16 homolog (S. cerevisiae)	1.08e-07	-2.402	Nucleus	other
	CUBN	cubilin (intrinsic factor-cobalamin receptor)	6.03e-07	-2.412	Plasma Membrane	transmembrane receptor
	ACE	angiotensin I converting enzyme (peptidyl-dipeptidase A) 1	3.07e-06	-2.429	Plasma Membrane	peptidase
	LRP3	low density lipoprotein receptor-related protein 3	6.19e-06	-2.429	Plasma Membrane	transmembrane receptor
[truncated: 2,156 more rows]
